# Supplementary material for: Tandem approach for the synthesis of 3-sulfenylimidazo[1,5-a]pyridines from dithioesters
Source: Royal Society of Chemistry journal article supplement (doi:10.1039/c6ra03771b), 2016-01-01

## Tandem Approach for the Synthesis of 3-Sulfenylimidazo[1,5-*a*]pyridines from Dithioesters

Ajjahalli. B. Ramesha,<sup>a</sup> Chottanahalli. S. Pavan Kumar,<sup>a</sup> Nagarakere. C. Sandhya,<sup>a</sup>  
Manikyanahalli. N. Kumara,<sup>b</sup> Kempegowda Mantelingu<sup>a\*</sup> and Kanchugarakoppal. S.  
Rangappa,<sup>a\*</sup>

*Synthetic Laboratory, DOS in Chemistry, University of Mysore, Manasagangotri,  
Mysore-570006, Karnataka, India*  
*Department of Chemistry, Yuvaraja's College, University of Mysore, Mysore 570005,  
Karnataka, India*

### Table of contents

|                                                                                                         |       |
|---------------------------------------------------------------------------------------------------------|-------|
| 1. General information and procedures                                                                   | 2     |
| 2. ORTEP of Compound <b>4h</b>                                                                          | 3     |
| 3. Tables                                                                                               | 4-5   |
| 4. Characterization for compounds <b>4a-4n</b> and <b>5a-5h</b>                                         | 6-12  |
| 5. H <sup>1</sup> NMR and C <sup>13</sup> NMR images for the compounds<br><b>4a-4n</b> and <b>5a-5h</b> | 13-60 |

**General Information:** 2-methylaminopyridine, 2-hydrazinylpyridine, sulfonyl hydrazides and iodine were purchased from commercial sources and used as received. Reagent grade THF was purchased from Sigma-Aldrich and distilled over sodium. Purification of reaction products was carried out by flash column chromatography using Sorbent Technologies Standard Grade silica gel (60 Å, 230–400 mesh). Analytical thin layer chromatography was performed on EM Reagent 0.25 mm silica gel 60 F254 plates. Visualization was accomplished with UV light, potassium permanganate and DragendorffMunier stains followed by heating. Melting points were recorded on a Thomas Hoover capillary melting point apparatus and are uncorrected. Proton nuclear magnetic resonance spectra (<sup>1</sup>H-NMR) were recorded on Agilent-400 MHz and are reported in ppm using chloroform as the internal standard (7.24 ppm). Data are reported as app = apparent, s = singlet, d = doublet, t = triplet, q = quartet, m = multiplet, comp = complex, br = broad; and coupling constant(s) in Hz. Proton-decoupled carbon nuclear magnetic resonance spectra (<sup>13</sup>C-NMR) were recorded on a Agilent-400 MHz, Bruker-400 MHz and are reported in ppm using chloroform as the internal standard (77.0 ppm). Mass spectra were recorded on Agilent mass spectrum

**General Procedure for the oxidative desulfurative cyclization of dithioesters :**

To a solution of dithioester (1.0 eq, 1.0 mmol) in ethanol (5 mL) was added amine or hydrazine (1.1 eq, 1.1 mmol) at room temperature, the resulting mixture was stirred for 45 min. monitored the dithioester could no longer be detected. To the above mixture was added I<sub>2</sub> (2.2 equiv, 2.2 mmol). The mixture was stirred at room temperature for 2h and progress was monitored by TLC. The reaction mixture was heated to 80 °C for 12-24 hrs. Once the reaction was completed, the reaction mixture was cooled to room temperature and ethanol was removed using rotary evaporator. The reaction mixture was quenched with 10 mL of water and; the aqueous layer was extracted with EtOAc (15 mL X 3). The combined organic layers were washed with water, dried over anhydrous Na<sub>2</sub>SO<sub>4</sub>. The solvent was removed under reduced pressure; the residue was purified by silica gel chromatography.

**General Procedure for the oxidative desulfurative cyclization of dithioesters :** To a solution of dithioester (1.0 eq, 1.0 mmol) in THF (2 mL) was added amine or hydrazine (1.1 eq, 1.1 mmol) at room temperature, the resulting mixture was stirred for 45 min. monitored the dithioester could no longer be detected. To the above mixture was added I<sub>2</sub> (2.0 equiv. The mixture was stirred at room temperature for 1.5 h and progress was monitored by TLC. The reaction mixture was diluted with EtOAc neutralized with saturated sodium bicarbonate solution, separated organic layer; the aqueous layer was extracted with EtOAc (25 mL X 3). The combined organic layers were washed with water, dried over anhydrous Na<sub>2</sub>SO<sub>4</sub>. The solvent was removed under reduced pressure; the residue was purified by silica gel chromatography.

### Ortep of Compound - 4h

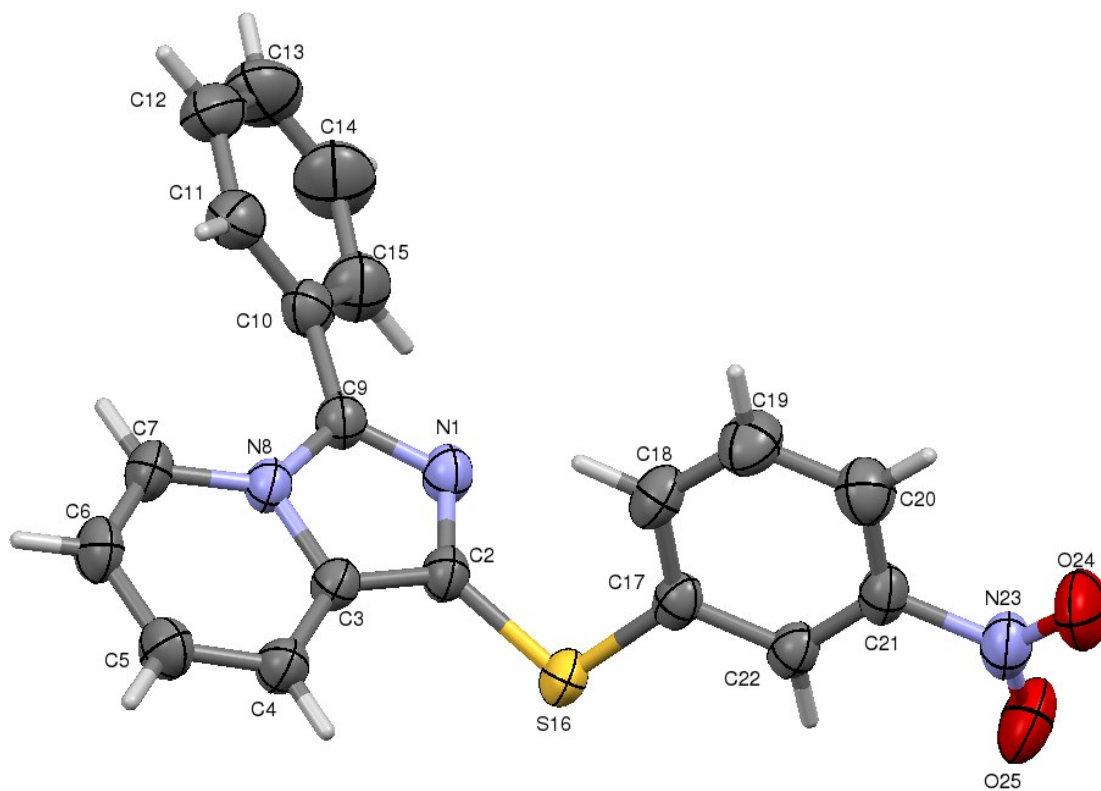

### ORTEP of 4h

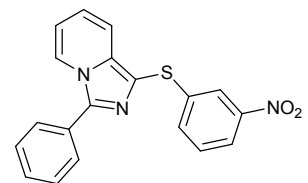

Table 1: Crystal data and structure refinement details.

|                                   |                                                                 |                 |  |
|-----------------------------------|-----------------------------------------------------------------|-----------------|--|
| Empirical formula                 | C <sub>19</sub> H <sub>13</sub> N <sub>3</sub> O <sub>2</sub> S |                 |  |
| Formula weight                    | 347.38                                                          |                 |  |
| Temperature                       | 296(2) K                                                        |                 |  |
| Wavelength                        | 1.54178 Å                                                       |                 |  |
| Reflns. for cell determination    | 2729                                                            |                 |  |
| θ range for above                 | 4.65° to 64.53°                                                 |                 |  |
| Crystal system                    | Monoclinic                                                      |                 |  |
| Space group                       | P 21/c                                                          |                 |  |
| Cell dimensions                   |                                                                 |                 |  |
| a = 9.6224(12) Å                  | b = 14.7044(19) Å                                               | c = 11.8502(16) |  |
| α = 90.00°                        | β = 98.565(4)°                                                  | γ = 90.00°      |  |
| Volume                            | 1658.0(4) Å <sup>3</sup>                                        |                 |  |
| Z                                 | 4                                                               |                 |  |
| Density(calculated)               | 1.392 Mg m <sup>-3</sup>                                        |                 |  |
| Absorption coefficient            | 1.885 mm <sup>-1</sup>                                          |                 |  |
| F <sub>000</sub>                  | 720                                                             |                 |  |
| Crystal size                      | 0.27 × 0.25 × 0.22 mm                                           |                 |  |
| θ range for data collection       | 4.65° to 64.53°                                                 |                 |  |
| Index ranges                      | -11 ≤ h ≤ 11                                                    |                 |  |
|                                   | -16 ≤ k ≤ 17                                                    |                 |  |
|                                   | -13 ≤ l ≤ 13                                                    |                 |  |
| Reflections collected             | 16278                                                           |                 |  |
| Independent reflections           | 2729 [R <sub>int</sub> = 0.0399]                                |                 |  |
| Absorption correction             | multi-scan                                                      |                 |  |
| Refinement method                 | Full matrix least-squares on F <sup>2</sup>                     |                 |  |
| Data / restraints / parameters    | 2729 / 0 / 226                                                  |                 |  |
| Goodness-of-fit on F <sup>2</sup> | 1.052                                                           |                 |  |
| Final [I > 2σ(I)]                 | R1 = 0.0355, wR2 = 0.0938                                       |                 |  |
| R indices (all data)              | R1 = 0.0368, wR2 = 0.0949                                       |                 |  |
| Largest diff. peak and hole       | 0.210 and -0.212 e Å <sup>-3</sup>                              |                 |  |

Table 2: Bond lengths (Å).

| Atoms   | Length     | Atoms   | Length     |
|---------|------------|---------|------------|
| N1-C9   | 1.324(2)   | C11-C12 | 1.390(3)   |
| N1-C2   | 1.364(2)   | C12-C13 | 1.362(4)   |
| C2-C3   | 1.388(2)   | C13-C14 | 1.378(4)   |
| C2-S16  | 1.7412(15) | C14-C15 | 1.377(3)   |
| C3-N8   | 1.3969(19) | S16-C17 | 1.7715(16) |
| C3-C4   | 1.409(2)   | C17-C18 | 1.385(2)   |
| C4-C5   | 1.360(2)   | C17-C22 | 1.398(2)   |
| C5-C6   | 1.418(3)   | C18-C19 | 1.384(3)   |
| C6-C7   | 1.341(2)   | C19-C20 | 1.382(3)   |
| C7-N8   | 1.3851(19) | C20-C21 | 1.377(2)   |
| N8-C9   | 1.380(2)   | C21-C22 | 1.379(2)   |
| C9-C10  | 1.466(2)   | C21-N23 | 1.473(2)   |
| C10-C11 | 1.391(3)   | N23-O25 | 1.211(2)   |
| C10-C15 | 1.395(3)   | N23-O24 | 1.220(2)   |

Table 3: Bond angles (°).

| Atoms       | Angle      | Atoms       | Angle      |
|-------------|------------|-------------|------------|
| C9-N1-C2    | 106.75(12) | C12-C11-C10 | 120.08(19) |
| N1-C2-C3    | 110.66(12) | C13-C12-C11 | 120.4(2)   |
| N1-C2-S16   | 122.71(11) | C12-C13-C14 | 120.1(2)   |
| C3-C2-S16   | 126.42(12) | C15-C14-C13 | 120.4(2)   |
| C2-C3-N8    | 104.66(12) | C14-C15-C10 | 120.2(2)   |
| C2-C3-C4    | 136.07(14) | C2-S16-C17  | 103.58(7)  |
| N8-C3-C4    | 119.26(13) | C18-C17-C22 | 119.38(15) |
| C5-C4-C3    | 119.17(15) | C18-C17-S16 | 123.72(12) |
| C4-C5-C6    | 120.25(15) | C22-C17-S16 | 116.90(12) |
| C7-C6-C5    | 120.94(15) | C19-C18-C17 | 120.46(15) |
| C6-C7-N8    | 119.61(15) | C20-C19-C18 | 121.07(16) |
| C9-N8-C7    | 132.00(13) | C21-C20-C19 | 117.41(16) |
| C9-N8-C3    | 107.21(12) | C20-C21-C22 | 123.39(15) |
| C7-N8-C3    | 120.68(13) | C20-C21-N23 | 118.90(15) |
| N1-C9-N8    | 110.70(13) | C22-C21-N23 | 117.69(15) |
| N1-C9-C10   | 123.62(14) | C21-C22-C17 | 118.27(14) |
| N8-C9-C10   | 125.67(13) | O25-N23-O24 | 123.22(15) |
| C11-C10-C15 | 118.76(16) | O25-N23-C21 | 118.59(15) |
| C11-C10-C9  | 123.33(16) | O24-N23-C21 | 118.19(16) |
| C15-C10-C9  | 117.82(16) |             |            |

## Experimental section: Characterization for compounds 4a-3q and 5a-5e

### 3-phenyl-1-(p-tolylthio)imidazo[1,5-a]pyridine (4a):

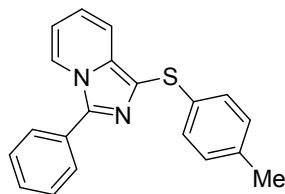

Pale yellow solid (160mg, 80%); M.p. 85–87 °C; <sup>1</sup>H NMR (400 MHz DMSO-d<sub>6</sub>): δ 8.49 (s, 1H), 7.85 (s, 2H), 7.59-7.53 (m, 3H), 7.47 (s, 1H), 7.06-7.0 (m, 5H), 6.81 (d, *J* = 5.6 Hz, 1H), 2.16 (s, 3H); <sup>13</sup>C NMR (100 MHz, DMSO-d<sub>6</sub>): δ 139.0, 135.4, 134.7, 129.6, 129.5, 128.99, 128.93, 128.2, 127.8, 121.9, 120.7, 118.5, 113.7, 20.8; HRMS (ESI-MS) *m/z*: Calcd for C<sub>14</sub>H<sub>12</sub>N<sub>2</sub> [M + H]<sup>+</sup> 317.1034 found: 317.1049.

### 3-(3-methoxyphenyl)-1-(p-tolylthio)imidazo[1,5-a]pyridine (4b):

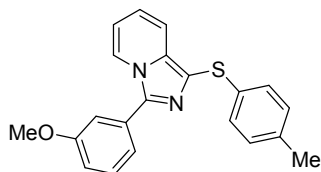

Brown solid (136mg, 82%); mp. 122–124 °C; <sup>1</sup>H NMR (400 MHz DMSO-d<sub>6</sub>): δ 8.53 (br s, 1H), 7.59 (br s, 1H), 7.47-7.38 (m, 3H), 7.04 (br s, 6H), 6.82 (d, *J* = 5.2 Hz, 1H), 3.83 (s, 3H), 2.18 (s, 3H); <sup>13</sup>C NMR (100 MHz, DMSO-d<sub>6</sub>): δ 160.1, 138.9, 135.4, 134.8, 134.5, 130.8, 129.9, 129.5, 127.7, 122.1, 120.8, 120.1, 118.4, 115.2, 113.7, 113.6, 55.4, 20.8; HRMS (ESI-MS) *m/z*: Calcd for C<sub>14</sub>H<sub>12</sub>N<sub>2</sub>O [M + H]<sup>+</sup> 347.1140 found: 347.1129.

### 1-((4-methoxyphenyl)thio)-3-phenylimidazo[1,5-a]pyridine (4c):

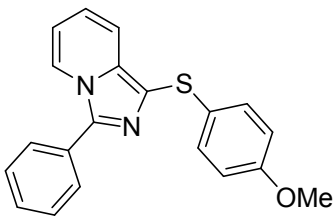

Oily compound (168mg, 84%); <sup>1</sup>H NMR (400 MHz DMSO-d<sub>6</sub>): δ 8.48 (d, *J* = 6.4 Hz, 1H), 7.85 (d, *J* = 6.8 Hz, 2H), 7.64 (t, *J* = 5.2 Hz, 1H), 7.54 (d, *J* = 7.2 Hz, 2H), 7.47 (t, *J* = 6.4 Hz, 1H), 7.24-7.22 (m, 2H), 7.01-6.96 (m, 1H), 6.85-6.78 (m, 3H), 3.66 (s, 3H); <sup>13</sup>C NMR (100 MHz, DMSO-d<sub>6</sub>) δ 158.5, 138.7, 134.6, 130.2, 129.7, 129.5, 129.4, 128.3, 123.3, 122.4, 120.8, 117.8, 115.2, 114.7, 113.1, 55.6 ppm. HRMS (ESI-MS) *m/z*: Calcd for C<sub>14</sub>H<sub>11</sub>FN<sub>2</sub> [M + H]<sup>+</sup> 333.0983 found: 333.0912.

### 3-(4-fluorophenyl)-1-((4-methoxyphenyl)thio)imidazo[1,5-a]pyridine (4d):

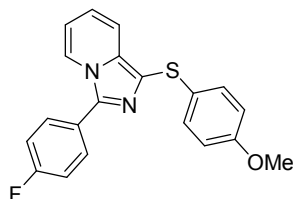

Pale yellow solid (172mg, 86%); mp. 105–107 °C; <sup>1</sup>H NMR (400MHz DMSO-d<sub>6</sub>): δ 8.44 (s, 1H), 7.89 (d, *J* = 5.2 Hz, 2H), 7.63 (d, *J* = 6.4 Hz, 1H), 7.37 (d, *J* = 6.4 Hz, 2H), 7.21 (d, *J* = 4.4 Hz, 2H), 7.98 (t, *J* = 6 Hz, 1H), 6.82 (d, *J* = 6.4 Hz, 3H), 3.66 (s, 3H); <sup>13</sup>C NMR (100 MHz,

DMSO- $d_6$ )  $\delta$  163.9, 161.5, 158.5, 137.9, 134.5, 130.79, 130.70, 130.2, 128.3, 127.5, 126.3, 126.2, 123.2, 120.7, 117.8, 116.6, 116.3, 115.2, 114.7, 113.1, 55.6 ppm. HRMS (ESI-MS)  $m/z$ : Calcd for  $C_{13}H_9ClN_2$   $[M + H]^+$  351.0889 found: 351.0881.

### 3-((4-methoxyphenyl)thio)-1-phenylimidazo[1,5-a]quinoline (4e):

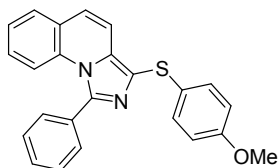

Pale brown solid (160mg, 80%); mp. 106–108 °C;  $^1H$  NMR (400 MHz DMSO- $d_6$ ):  $\delta$  7.87 (br s, 1H), 7.6 (s, 2H), 7.59 (d,  $J$  = 15.2 Hz, 4H), 7.42–7.34 (m, 4H), 7.26 (t,  $J$  = 4.4 Hz, 2H), 6.88–6.86 (m, 2H), 3.69 (s, 3H);  $^{13}C$  NMR (100 MHz, DMSO- $d_6$ ):  $\delta$  158.6, 142.7, 133.4, 133.3, 132.1, 130.5, 130.2, 130.0, 129.6, 129.3, 128.5, 127.7, 126.2, 125.5, 124.2, 123.4, 117.0, 116.3, 115.3, 55.6 ppm. HRMS (ESI-MS)  $m/z$ : Calcd for  $C_{11}H_8N_2S$   $[M + H]^+$  383.1140 found: 383.1139.

### 1-phenyl-3-(p-tolylthio)imidazo[1,5-a]quinoline (4f):

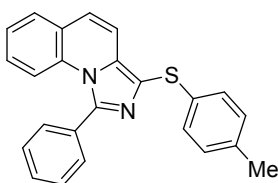

Pale green solid (138mg, 85%). mp. 90–92 °C;  $^1H$  NMR (400MHz DMSO- $d_6$ ):  $\delta$  7.88 (br s, 1H), 7.68–7.61 (m, 5H), 7.54 (d,  $J$  = 6.8 Hz, 1H), 7.41 (d,  $J$  = 11.6 Hz, 3H), 7.35 (s, 1H), 7.10 (d,  $J$  = 10.4 Hz, 2.22 (s, 3H);  $^{13}C$  NMR (100 MHz, DMSO- $d_6$ ):  $\delta$  142.9, 135.7, 134.2, 133.8, 133.4, 132.2, 130.9, 130.2, 130.0, 129.7, 129.4, 128.6, 128.3, 127.7, 126.3, 125.5, 124.4, 122.1, 117.0, 116.2, 20.9 ppm. HRMS (ESI-MS)  $m/z$ : Calcd for  $C_{14}H_{12}N_2$   $[M + H]^+$  367.1191 found: 367.1199.

### 1-((3,4-difluorophenyl)thio)-3-phenylimidazo[1,5-a]pyridine (4g):

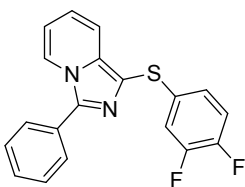

Pale yellow solid (164mg, 82%); mp. 101–103 °C;  $^1H$  NMR (400 MHz DMSO- $d_6$ ):  $\delta$  8.54 (s, 1H), 7.87 (s, 2H), 7.63–7.50 (m, 4H), 7.30 (d,  $J$  = Hz, 1H), 7.19 (br s, 1H), 7.06 (br s, 1H), 6.95 (br s, 1H), 6.86 (d,  $J$  = 4.4 Hz, 1H);  $^{13}C$  NMR (100 MHz, DMSO- $d_6$ ):  $\delta$  151.7, 151.5, 150.0, 149.8, 149.2, 149.0, 147.5, 147.4, 139.6, 135.1, 134.8, 129.3, 129.2, 129.0, 128.2, 123.17, 123.12, 123.0, 122.1, 121.5, 119.3, 118.0, 117.5, 117.3, 116.3, 116.1, 113.9; HRMS (ESI-MS):  $m/z$   $[M+H]^+$  Calcd for  $C_{13}H_{10}N_2$ : 339.0689 found: 339.0631.

### 1-((3-nitrophenyl)thio)-3-phenylimidazo[1,5-a]pyridine (4h):

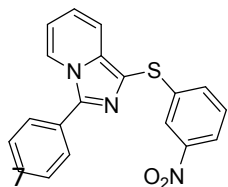

Yellow solid (178mg, 89%); mp. 132–134 °C;  $^1H$  NMR (400 MHz DMSO- $d_6$ ):  $\delta$  8.52 (d,  $J$  = 6 Hz, 1H), 7.88 (t,  $J$  = 7.2 Hz, 4H), 7.61–7.47 (m, 6H), 7.03

(t,  $J = 7.6$  Hz, 1H), 6.85 (d,  $J = 6.4$ Hz, 1H);  $^{13}\text{C}$  NMR (100 MHz, DMSO- $d_6$ ):  $\delta$  148.6, 141.5, 139.8, 135.7, 132.6, 130.9, 129.7, 129.5, 129.4, 128.4, 123.6, 123.5, 120.8, 120.4, 117.4, 116.5, 115.0 ppm. HRMS (ESI-MS)  $m/z$ : Calcd for  $\text{C}_{12}\text{H}_8\text{FN}_3$   $[\text{M} + \text{H}]^+$  348.0728 found: 348.0773.

### 3-(4-methoxyphenyl)-1-((3-nitrophenyl)thio)imidazo[1,5-a]pyridine (4i):

Yellow solid (162mg, 81%); mp. 102–104 °C;  $^1\text{H}$  NMR (400 MHz DMSO- $d_6$ ):  $\delta$  8.62 (s, 1H), 7.98-7.94 (m, 2H), 7.68 (t,  $J = 5.2$  Hz, 1H), 7.56-7.51 (m, 3H), 7.46 (s, 1H), 7.42 (s, 1H), 7.11 (br s, 2H), 6.92 (d,  $J = 5.6$  Hz, 1H), 3.86 (s, 3H);  $^{13}\text{C}$  NMR (100 MHz, DMSO- $d_6$ ):  $\delta$  160.1, 148.6, 141.6, 139.9, 135.5, 132.1, 130.4, 130.0, 129.3, 122.4, 121.9, 121.1, 120.2, 120.1, 117.8, 115.5, 114.0, 113.7, 55.4; HRMS (ESI-MS)  $m/z$ : Calcd for  $\text{C}_{17}\text{H}_{12}\text{N}_2$   $[\text{M} + \text{H}]^+$  378.0834 found: 378.0862.

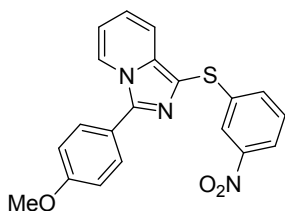

### 3-(3-methoxyphenyl)-1-((4-(trifluoromethyl)phenyl)thio)imidazo[1,5-a]pyridine (4j)

Pale yellow solid (140mg, 78%); mp. 90–92 °C;  $^1\text{H}$  NMR (400M Hz DMSO- $d_6$ ):  $\delta$  8.60 (d,  $J = 6$  Hz, 1H), 7.60 (d,  $J = 9.2$  Hz, 1H), 7.55 (d,  $J = 8.4$  Hz, 2H), 7.47 (d,  $J = 10$  Hz, 2H), 7.41 (s, 1H), 7.26 (d,  $J = 6.8$  Hz, 2H), 7.07 (d,  $J = 7.2$  Hz, 2H), 6.89 (d,  $J = 6$ Hz, 1H), 3.84 (s, 3H);  $^{13}\text{C}$  NMR (100 MHz, DMSO- $d_6$ )  $\delta$  164.8, 162.8, 160.1, 149.2, 148.8, 144.7, 139.5, 139.0, 135.8, 135.1, 130.8, 130.6, 128.7, 128.5, 126.36, 126.30, 126.2, 126.1, 123.8, 123.3, 123.2, 120.6, 120.1, 119.3, 117.4, 116.5, 115.6, 114.9, 113.6, 55.7 ppm. HRMS (ESI-MS):  $m/z$   $[\text{M} + \text{H}]^+$  Calcd for  $\text{C}_{15}\text{H}_{14}\text{N}_2$ : 401.0908 found: 401.0919.

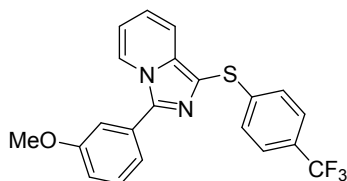

### 3-phenyl-1-((4-(trifluoromethyl)phenyl)thio)imidazo[1,5-a]pyridine (4k):

Oily compound (152mg, 76%);  $^1\text{H}$  NMR (400 MHz DMSO- $d_6$ ):  $\delta$  8.60 (d,  $J = 8$  Hz, 1H), 7.89 (d,  $J = 3.2$  Hz, 2H), 7.60-7.54 (m, 5H), 7.53 (br s, 1H) 7.27 (d,  $J = 7.6$  Hz, 2H), 7.09 (d,  $J = 8.4$  Hz, 1H), 6.92 (d,  $J = 3.6$  Hz, 1H);  $^{13}\text{C}$  NMR (100 MHz, DMSO- $d_6$ ):  $\delta$  144.8, 139.7, 135.7, 129.64, 129.60, 128.5, 126.39, 126.32, 126.1, 126.0, 123.7, 123.4, 117.4, 116.5, 114.9; HRMS (ESI-MS)  $m/z$ : Calcd for  $\text{C}_{19}\text{H}_{17}\text{FN}_2\text{S}$   $[\text{M} + \text{H}]^+$  371.0752 found: 371.0767.

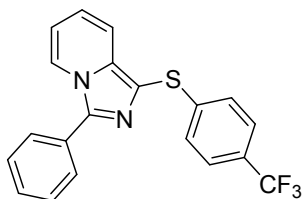



### 1-phenyl-3-((4-(trifluoromethyl)phenyl)thio)imidazo[1,5-a]quinoline (4l):

Oily Compound (176mg, 84%); <sup>1</sup>H NMR (400 MHz DMSO-d<sub>6</sub>): δ 7.93 (br s, 1H), 7.22 (s, 2H), 6.22 (t, *J* = 8 Hz, 5H), 7.55 (d, *J* = 8 Hz, 1H), 7.49 (d, *J* = 5.2 Hz, 2H), 7.40 (d, *J* = 6.4, 2H), 7.33 (d, *J* = 6.4 Hz, 2H); <sup>13</sup>C NMR (100 MHz, DMSO-d<sub>6</sub>) δ 144.3, 143.6, 134.6, 133.4, 132.2, 130.4, 130.1, 129.8, 129.4, 128.8, 126.6, 126.4, 126.37, 123.33, 125.5, 125.1, 119.2, 117.0, 115.9 ppm.

HRMS (ESI-MS) *m/z*: Calcd for C<sub>17</sub>H<sub>11</sub>FN<sub>2</sub> [M + H]<sup>+</sup> 421.0908 found: 421.0967.

### 1-(cyclopropylthio)-3-phenylimidazo[1,5-a]pyridine (4m)

Oily compound (152mg, 72%); <sup>1</sup>H NMR (400 MHz DMSO-d<sub>6</sub>): δ 8.24 (d, *J* = 7.6 Hz, 1H), 7.81 (d, *J* = 6.8 Hz, 2H), 7.64 (d, *J* = 9.2 Hz, 1H), 7.51 (t, *J* = 8.2 Hz, 2H), 7.43 (t, *J* = 7.6 Hz, 1H), 6.83-6.79 (m, 1H), 6.60 (t, *J* = 6.4 Hz, 1H), 2.36-2.30 (m, 1H), 0.83-0.78 (m, 2H), 0.77-0.73 (m, 2H); <sup>13</sup>C NMR (100 MHz, DMSO-d<sub>6</sub>): δ 138.4, 133.8, 129.8, 128.9, 128.8, 128.1, 123.9, 121.7, 120.0, 118.6, 113.4, 29.6, 16.7, 8.4 HRMS (ESI-MS) *m/z*: Calcd for C<sub>19</sub>H<sub>17</sub>FN<sub>2</sub>S [M + H]<sup>+</sup> 267.0878 found: 267.0866.

### 1-(phenethylthio)-3-phenylimidazo[1,5-a]pyridine(4n)

Oily compound (152mg, 76%); <sup>1</sup>H NMR (400 MHz DMSO-d<sub>6</sub>): δ 8.23 (d, *J* = 7.6 Hz, 1H), 7.81 (d, *J* = 7.2 Hz, 2H), 7.60 (d, *J* = 8.8 Hz, 1H), 7.52 (t, *J* = 7.6 Hz, 2H), 7.44 (t, *J* = 7.6 Hz, 1H), 7.22 (t, *J* = 3.6 Hz, 2H), 7.17 (t, *J* = 6.8 Hz, 3H), 6.81-6.78 (m, 1H), 6.60 (t, *J* = 6.8 Hz, 1H), 3.18-3.12 (m, 2H), 2.93 (t, *J* = 7.2 Hz, 2H); <sup>13</sup>C NMR (100 MHz, DMSO-d<sub>6</sub>): δ 148.2, 138.0, 137.5, 133.7, 130.5, 130.4, 130.1, 130.0, 127.7, 125.9, 123.9, 123.3, 121.4, 120.0, 118.6, 116.1, 115.9, 113.6, 38.2, 35.8; HRMS (ESI-MS) *m/z*: Calcd for C<sub>19</sub>H<sub>17</sub>FN<sub>2</sub>S [M + H]<sup>+</sup> 331.1191 found: 331.1186.

### 3-phenylimidazo[1,5-a]pyridine (5a):

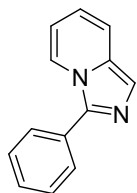

Pale yellow solid (164mg, 82%); mp. 101–103 °C; <sup>1</sup>H NMR (400 MHz DMSO-*d*<sub>6</sub>): δ 6.70–6.66 (m, 1H), 6.82–6.79 (m, 1H), 7.45 (t, *J* = 7.2 Hz, 1H), 7.54–7.50 (m, 3H), 7.62 (d, *J* = 8.8 Hz, 1H), 7.81–7.79 (m, 2H), 8.42 (d, *J* = 6.8 Hz, 1H); <sup>13</sup>C NMR (100 MHz, DMSO-*d*<sub>6</sub>): δ 137.7, 131.8, 130.6, 128.5, 128.1, 127.8, 122.4, 122.1, 121.4, 119.1, 118.9, 113.9, 113.8; HRMS (ESI-MS): *m/z* [M+H]<sup>+</sup> Calcd for C<sub>13</sub>H<sub>10</sub>N<sub>2</sub>: 195.2319 found: 195.2321.

### (3g):8-methyl-3-(p-tolyl)imidazo[1,5-a]pyridine (5b):

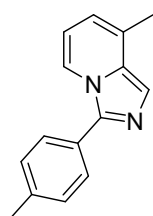

Pale yellow solid (140mg, 70%); mp. 90–92 °C; <sup>1</sup>H NMR (400M Hz DMSO-*d*<sub>6</sub>): δ 2.30 (s, 3H), 2.32 (s, 3H), 6.38–6.37 (m, 2H), 7.21 (d, *J* = 7.6 Hz, 2H), 7.41 (d, *J* = 0.8 Hz, 1H), 7.57 (d, *J* = 7.6 Hz, 2H), 8.00–7.98 (m, 1H); <sup>13</sup>C NMR (100 MHz, DMSO-*d*<sub>6</sub>): δ 138.7, 138.6, 132.6, 129.7, 129.5, 128.6, 128.0, 127.8, 127.4, 119.3, 119.2, 118.9, 118.7, 117.7, 117.6, 117.5, 113.3, 113.2, 113.1, 21.4, 17.8; HRMS (ESI-MS): *m/z* [M+H]<sup>+</sup> Calcd for C<sub>15</sub>H<sub>14</sub>N<sub>2</sub>: 222.2851 found: 222.2864.

### 3-(4-Fluorophenyl)-8-methylimidazo[1,5-a]pyridine (5c):

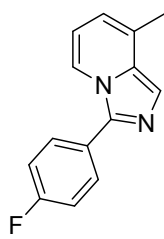

Oily compound (168mg, 84%); <sup>1</sup>H NMR (400 MHz DMSO-*d*<sub>6</sub>): δ 2.37 (s, 3H), 6.61–6.60 (m, 2H), 7.36–7.31 (m, 2H), 7.51 (s, 1H), 7.84–7.80 (m, 2H), 7.51 (s, 1H), 7.84–7.80 (m, 2H), 8.23–8.21 (m, 1H); <sup>13</sup>C NMR (100 MHz, DMSO-*d*<sub>6</sub>): δ 164.2, 161.8, 141.0, 132.3, 132.2, 132.0, 130.63, 130.60, 129.4, 128.1, 125.8, 125.6, 122.7, 122.6, 121.8, 117.6, 116.8, 116.4, 116.2; HRMS (ESI-MS) *m/z*: Calcd for C<sub>14</sub>H<sub>11</sub>FN<sub>2</sub> [M + H]<sup>+</sup> 227.2489 found: 227.2488.

### 1-(4-fluorophenyl)imidazo[1,5-a]quinoline (5d):

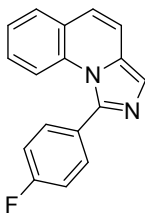

Oily Compound (176mg, 88%); <sup>1</sup>H NMR (400 MHz DMSO-*d*<sub>6</sub>): δ 7.19 (d, *J* = 9.6 Hz, 1H), 7.41 (m, 5H), 7.50 (d, *J* = 9.6 Hz, 1H), 7.53 (s, 1H), 7.66–7.62 (m, 2H), 7.78 (d, *J* = 7.6 Hz, 1H); <sup>13</sup>C NMR (100 MHz, DMSO-*d*<sub>6</sub>): δ 164.0, 161.6, 146.9, 143.7, 143.6, 143.5, 138.0, 130.7, 130.6, 130.5, 129.4, 127.6, 126.6, 126.0, 125.6, 116.6, 116.4; HRMS (ESI-MS) *m/z*: Calcd for C<sub>17</sub>H<sub>11</sub>FN<sub>2</sub> [M + H]<sup>+</sup> 263.2810 found: 263.2818.

### 3-(thiophen-3-yl)imidazo[1,5-a]pyridine (5e):

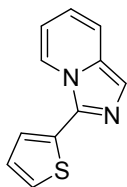

Pale brown solid (160mg, 80%); mp. 106–108 °C; <sup>1</sup>H NMR (400 MHz DMSO-d<sub>6</sub>): δ 6.82–6.74 (m, 2H), 7.19–7.17 (m, 1H), 7.50 (s, 1H), 7.66–7.58 (m, 3H), 8.49 (d, *J* = 6.4 Hz, 1H); <sup>13</sup>C NMR (100 MHz, DMSO-d<sub>6</sub>): δ 133.1, 132.7, 131.9, 128.5, 126.7, 126.6, 124.28, 124.23, 122.6, 121.08, 121.03, 119.6, 118.9, 114.5; HRMS (ESI-MS) *m/z*: Calcd for C<sub>11</sub>H<sub>8</sub>N<sub>2</sub>S [M + H]<sup>+</sup> 201.2596 found: 201.2593.

### 3-(tert-butyl)imidazo[1,5-a]pyridine (5f):

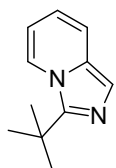

Oily Compound; yield: 138mg (69%); <sup>1</sup>H NMR (400 MHz DMSO-d<sub>6</sub>): δ = 1.45 (s, 9H), 6.58 (t, *J* = 6.8 Hz, 1H), 6.70–6.65 (m, 1H), 7.22 (s, 1H), 7.50 (d, *J* = 9.6 Hz, 1H), 8.34 (d, *J* = 7.6 Hz, 1H), <sup>13</sup>C NMR (100 MHz, DMSO-d<sub>6</sub>): δ = 27.4, 28.2, 112.0, 117.83, 117.89, 118.9, 123.8, 131.6, 145.0; HRMS (ESI-MS) *m/z*: Calcd for C<sub>11</sub>H<sub>14</sub>N<sub>2</sub> [M + H]<sup>+</sup> 174.2423 found: 174.2427.

### 3-(p-tolyl)-[1,2,4]triazolo[4,3-a]pyridine (5g):

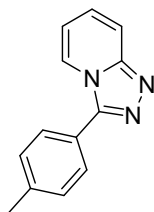

Pale yellow solid; yield: 170mg (85%); MP 118–120 °C; <sup>1</sup>H NMR (400 MHz DMSO-d<sub>6</sub>): δ 8.19 (t, *J* = 6.8 Hz, 1H), 7.70 (t, *J* = 9.2 Hz, 1H), 7.64–7.60 (m, 2H), 7.30 (d, *J* = 7.6 Hz, 2H), 7.20–7.18 (m, 1H), 6.78 (t, *J* = 6.4 Hz, 1H), 2.37 (s, 3H); <sup>13</sup>C NMR (100 MHz, DMSO-d<sub>6</sub>): δ 150.3, 146.7, 140.3, 129.9, 28.0, 126.6, 122.6, 116.6, 116.5, 114.0, 21.4; HRMS (ESI-MS) *m/z*: Calcd for C<sub>13</sub>H<sub>11</sub>N<sub>3</sub> [M + H]<sup>+</sup> 209.2465 found: 209.2462.

### 3-(4-methoxyphenyl)-[1,2,4]triazolo[4,3-a]pyridine (5h):

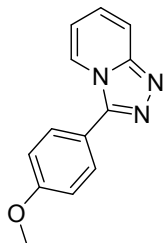

Pale yellow solid; yield: 168mg (84%); MP 121–123 °C; <sup>1</sup>H NMR (400 MHz DMSO-d<sub>6</sub>): δ 8.20 (d, *J* = 6.8 Hz, 1H), 7.77–7.71 (m, 3H), 7.22 (t, *J* = 7.2 Hz, 1H), 7.06 (d, *J* = 8 Hz, 2H), 6.81 (t, *J* = 6.4 Hz, 1H), 3.86 (s, 3H); <sup>13</sup>C NMR (100 MHz, DMSO-d<sub>6</sub>) δ 161.0, 129.7, 126.6, 122.5, 118.9, 116.7, 113.9, 55.4; HRMS (ESI-MS) *m/z*: Calcd for C<sub>13</sub>H<sub>11</sub>N<sub>3</sub>O [M + H]<sup>+</sup> 225.2459 found: 225.2458.

### 3-(2-methoxyphenyl)imidazo[1,5-a]pyridine (5i):

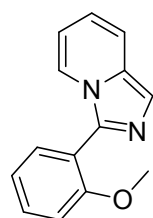

Pale brown solid (143mg, 76%); mp. 119–121 °C; <sup>1</sup>H NMR (400 MHz DMSO-d<sub>6</sub>): 7.61-7.56 (m, 3H), 7.47-7.42 (m, 2H), 7.09 (t, *J* = 7.2 Hz, 1H), 7.03 (d, *J* = 8.8 Hz, 1H), 6.73-6.69 (m, 1H), 6.49 (t, *J* = 6.8 Hz, 1H), 3.79 (s, 3H); <sup>13</sup>C NMR (100 MHz, DMSO-d<sub>6</sub>): δ 157.3, 136.1, 132.4, 131.2, 130.5, 123.0, 121.1, 120.0, 119.4, 118.4, 118.1, 111.7, 111.2, 55.5; HRMS (ESI-MS) *m/z*: Calcd for C<sub>14</sub>H<sub>12</sub>N<sub>2</sub>O [M + H]<sup>+</sup> 225.2579 found: 225.2566.

### 3-(naphthalen-1-yl)imidazo[1,5-a]pyridine (5j):

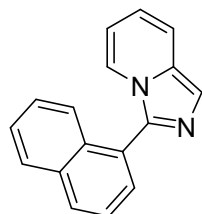

Pale brown solid (154mg, 73%); mp. 104–106°C; <sup>1</sup>H NMR (400 MHz DMSO-d<sub>6</sub>): δ 7.98-7.91 (m, 2H), 7.73-7.71 (m, 2H), 7.66-7.64 (m, 2H), 7.60-7.53 (m, 1H), 7.51-7.49 (m, 2H), 7.46-7.42 (m, 2H), 6.74-6.70 (m, 1H), 6.54-6.41 (m, 1H); <sup>13</sup>C NMR (100 MHz, DMSO-d<sub>6</sub>): δ 136.9, 133.9, 131.9, 131.0, 129.7, 128.5, 127.4, 126.9, 125.5, 125.3, 121.7, 120.2, 118.8, 118.5, 112.5; HRMS (ESI-MS) *m/z*: Calcd for C<sub>17</sub>H<sub>12</sub>N<sub>2</sub> [M + H]<sup>+</sup> 225.2906 found: 225.2911.

<sup>1</sup>H NMR of 4a

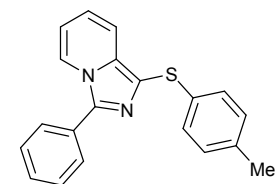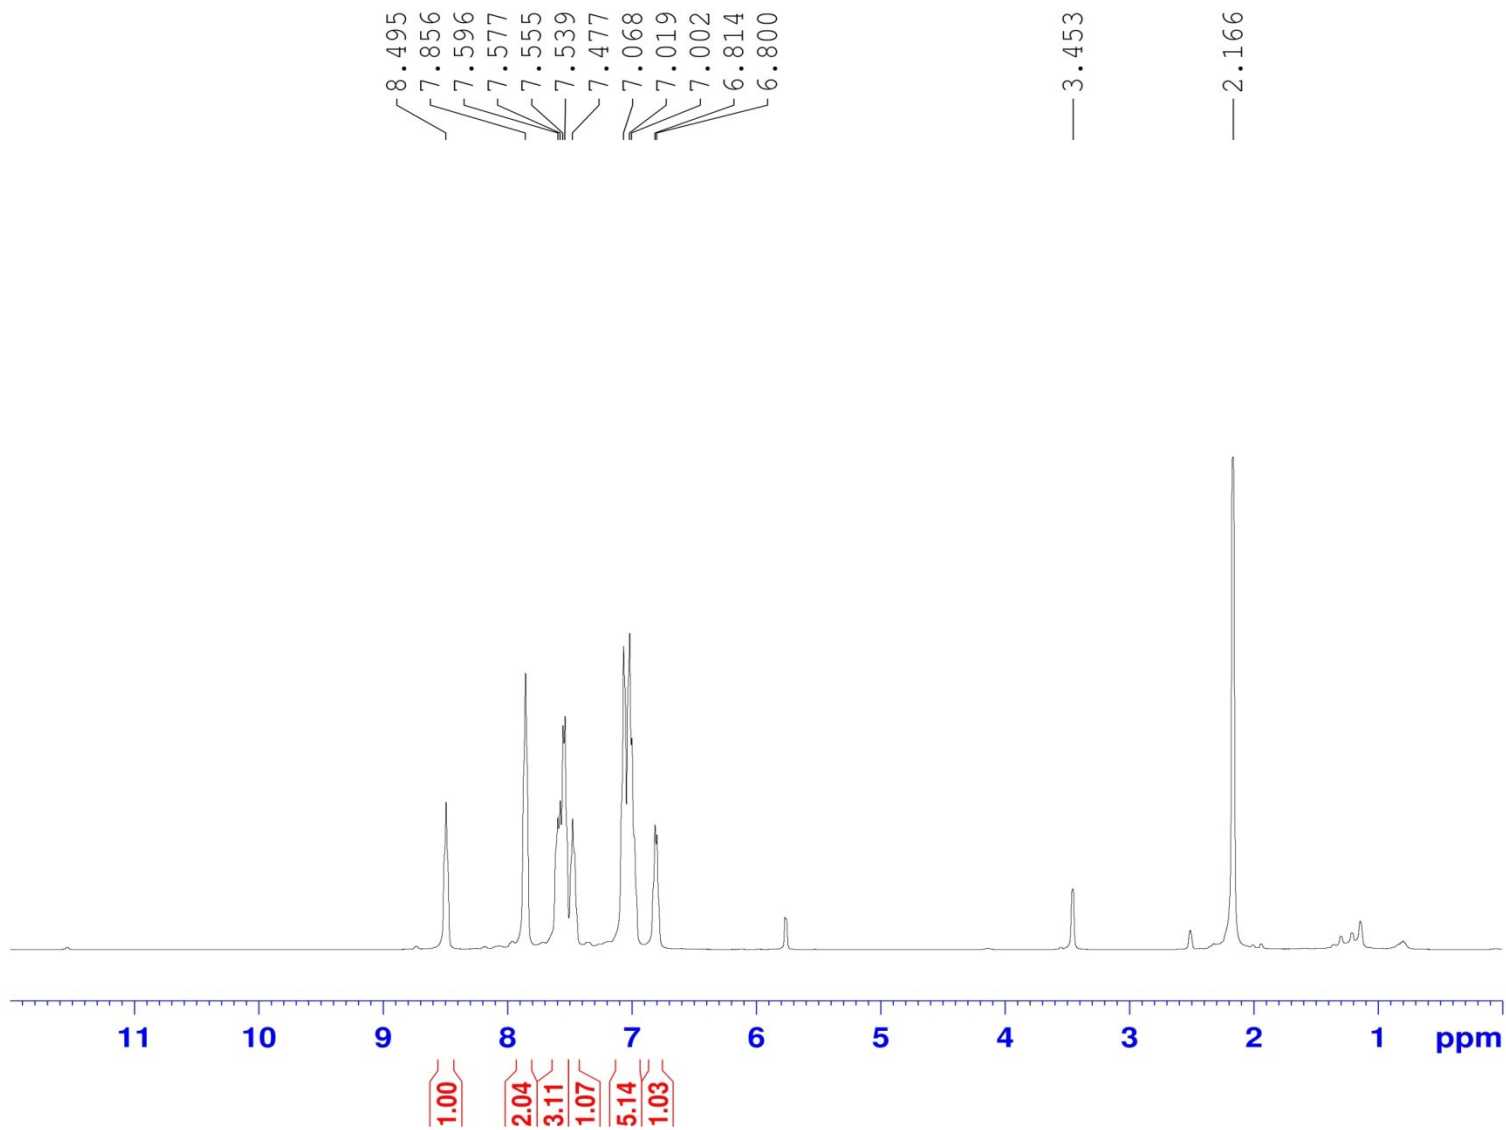

<sup>13</sup>C Spectra of 4a

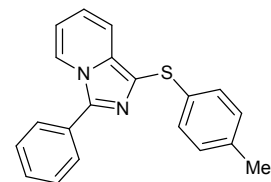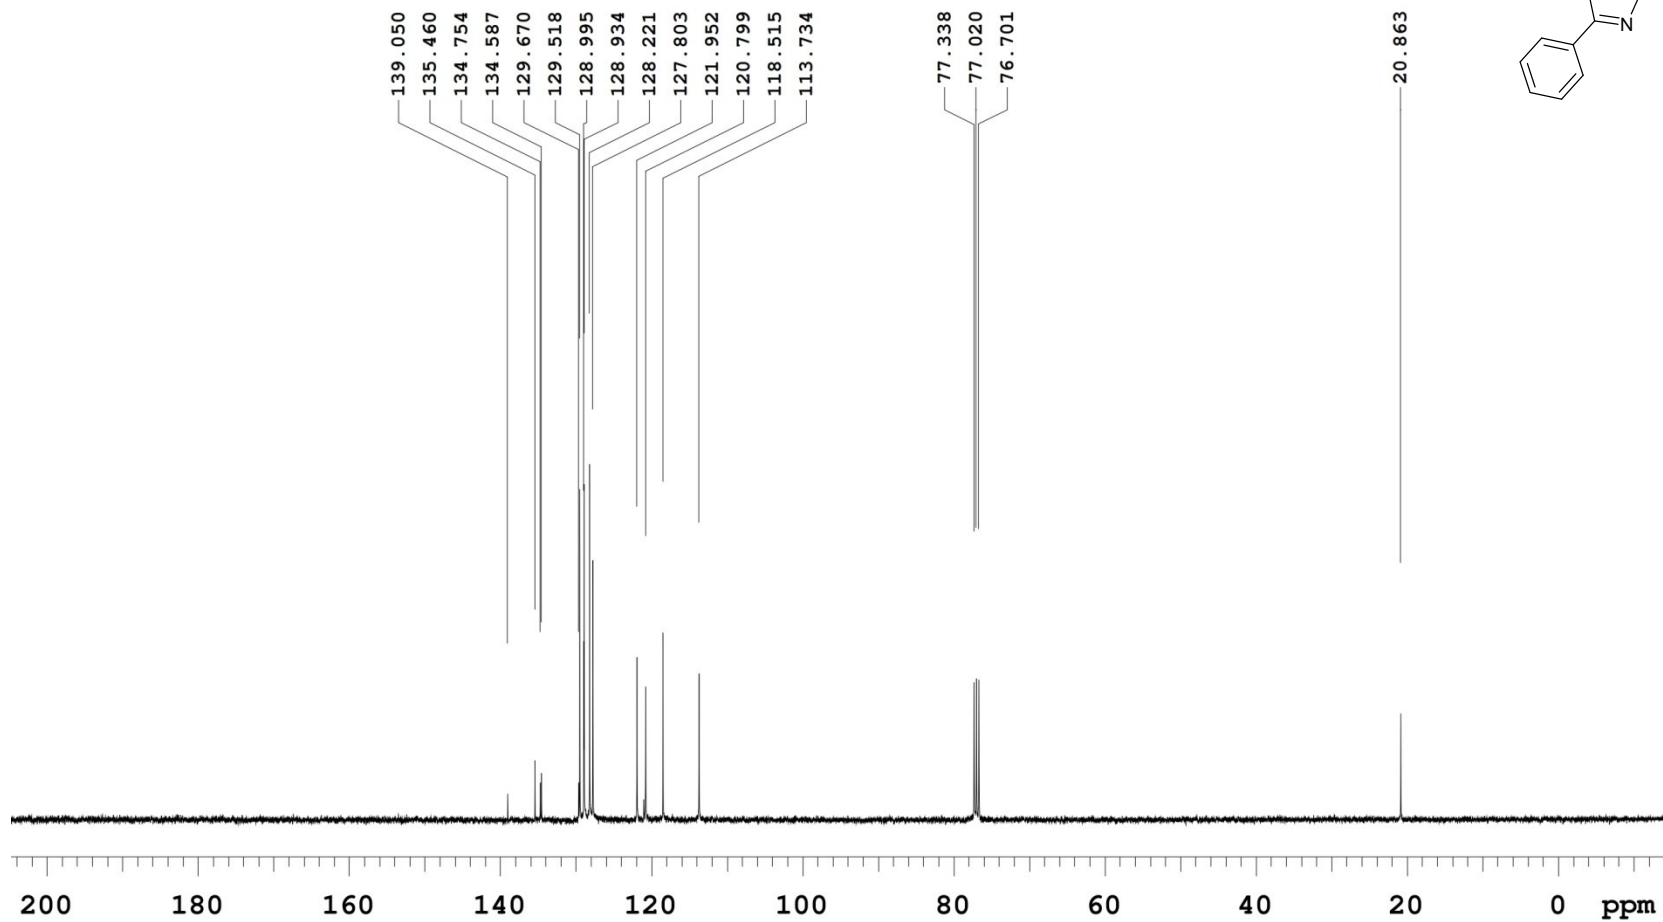

<sup>1</sup>H NMR of 4b

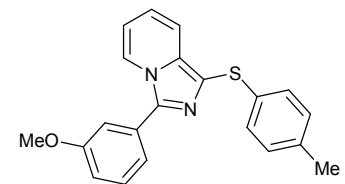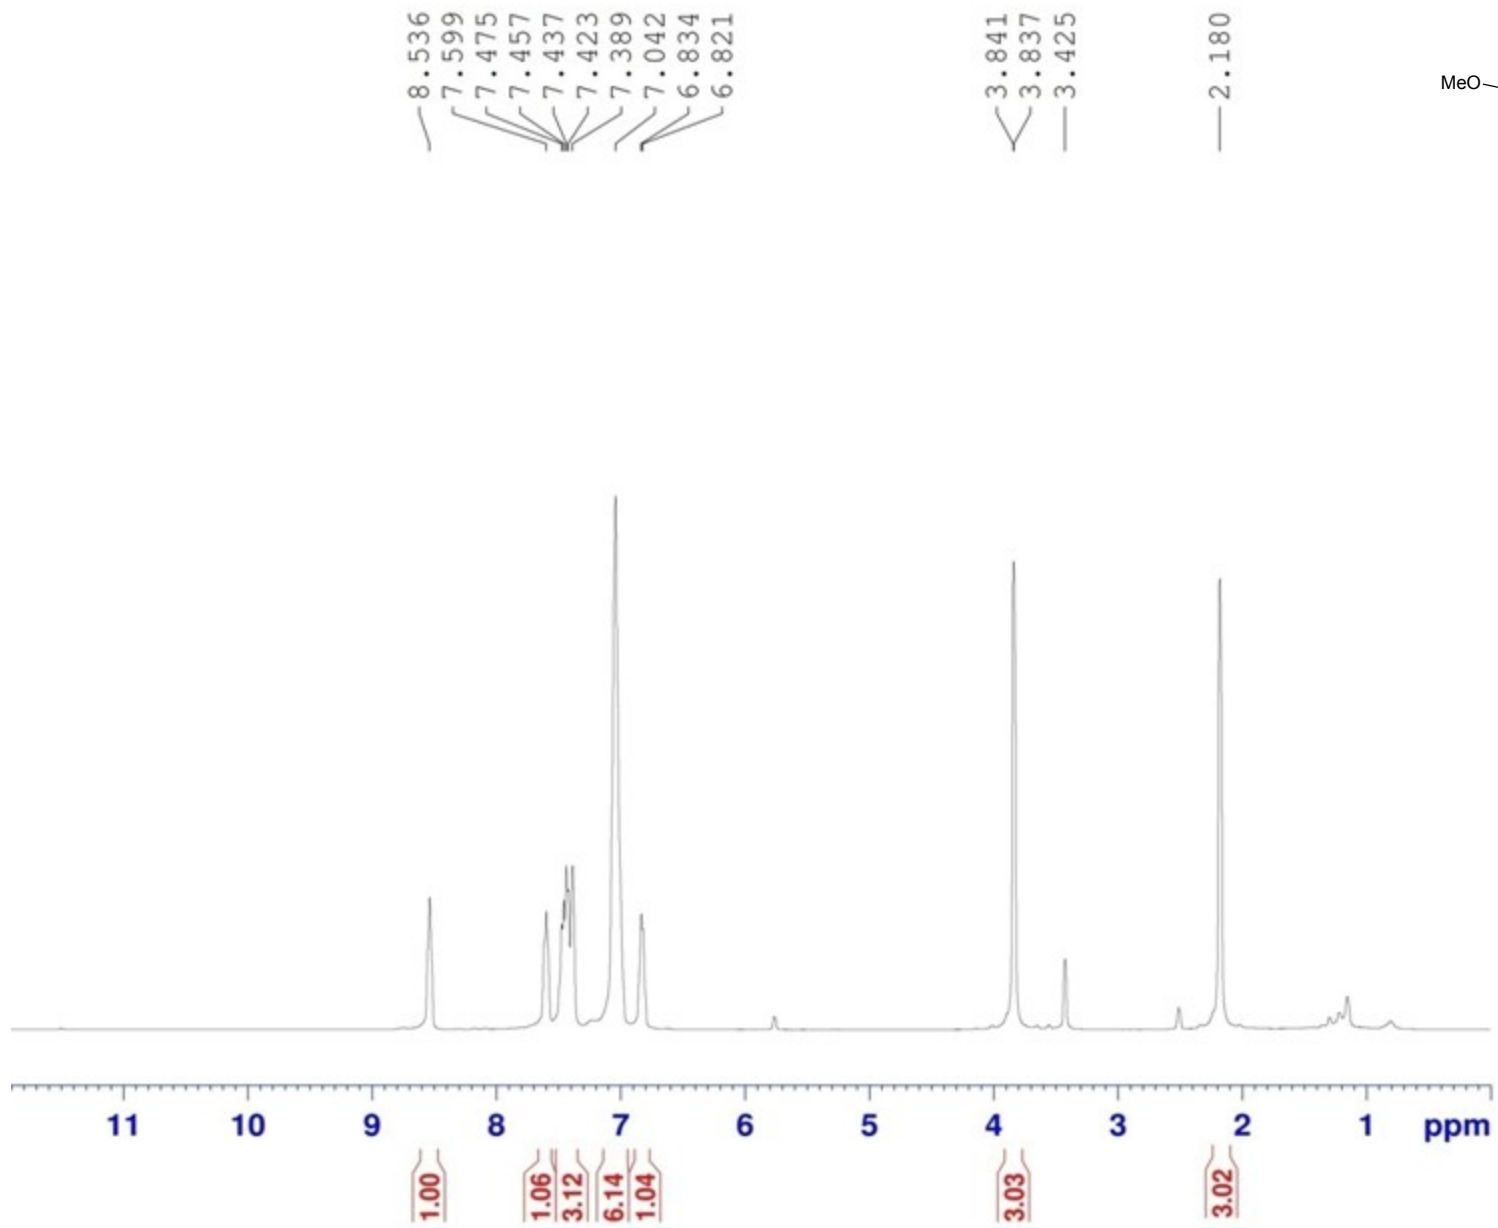

<sup>13</sup>C Spectra of **4b**

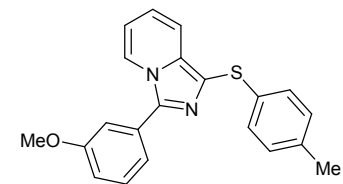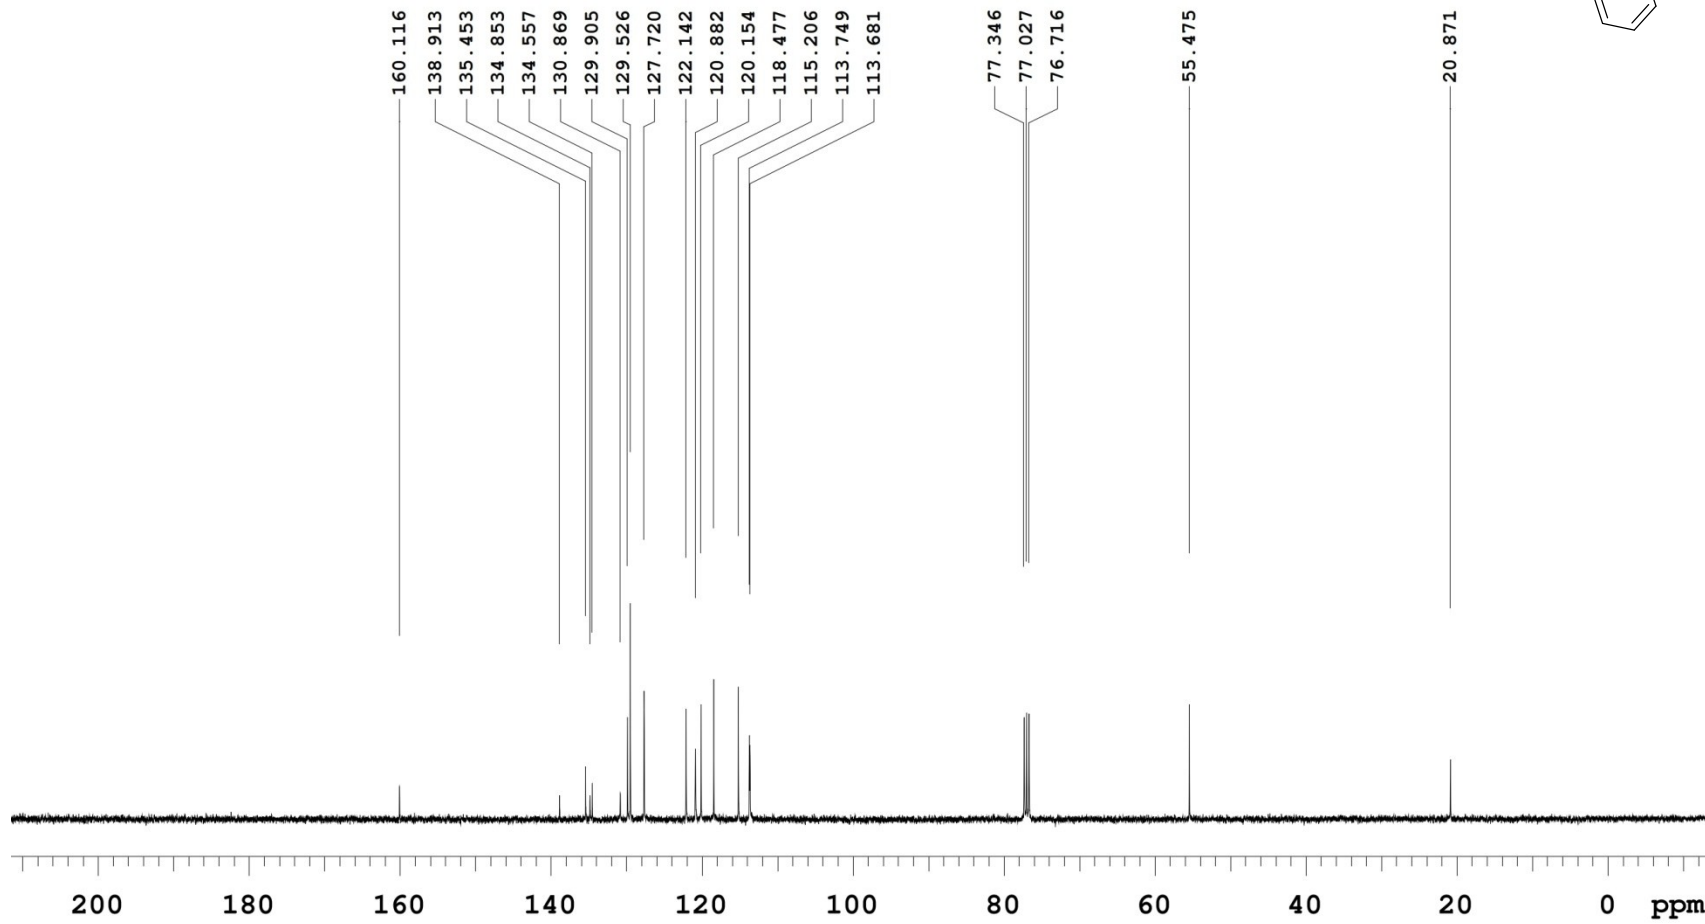



<sup>1</sup>H NMR of 4c

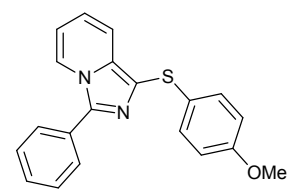

8.491  
8.475  
7.863  
7.846  
7.664  
7.643  
7.630  
7.552  
7.534  
7.490  
7.474  
7.457  
7.244  
7.241  
7.224  
7.015  
6.998  
6.977  
6.963  
6.851  
6.832  
6.820  
6.804  
6.787  
3.669  
3.654  
3.497  
— 2.512

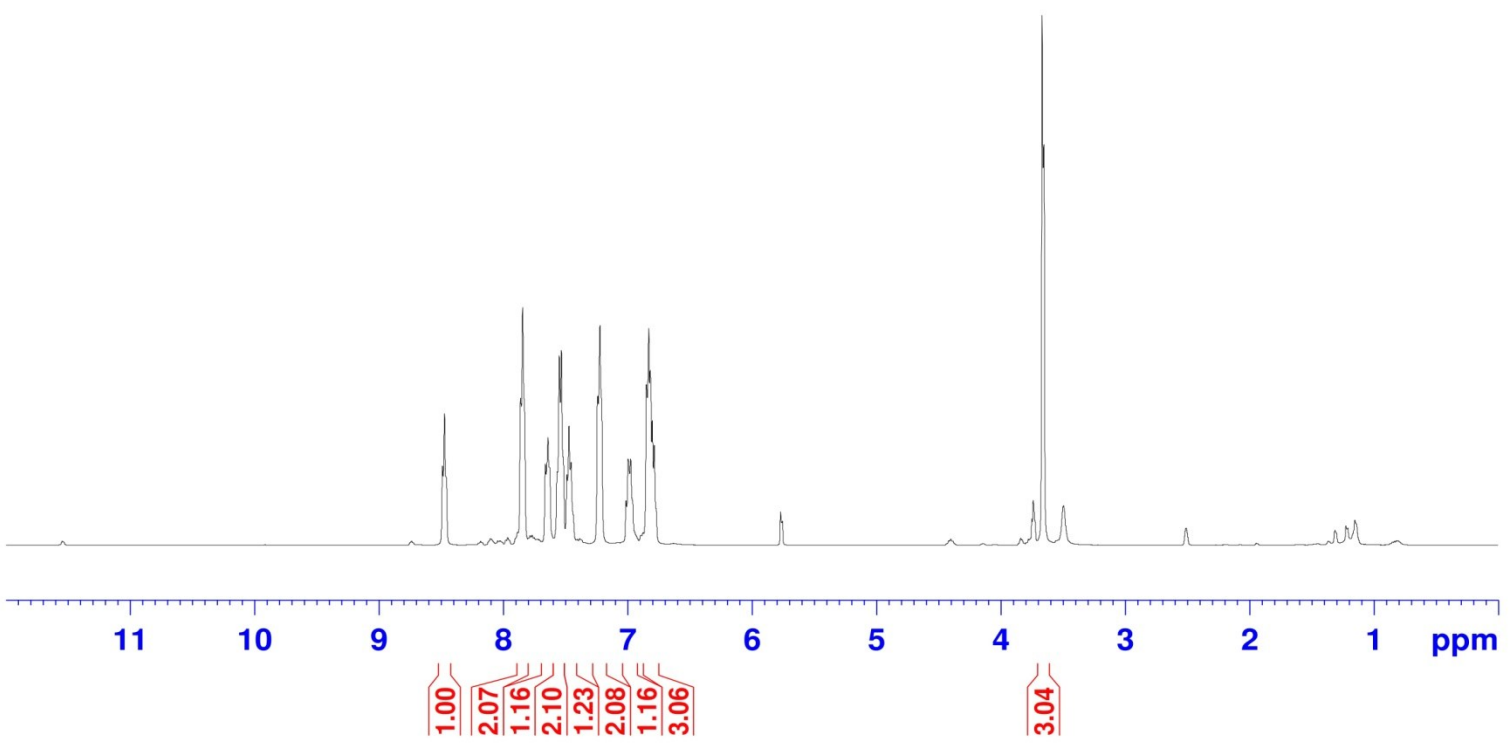

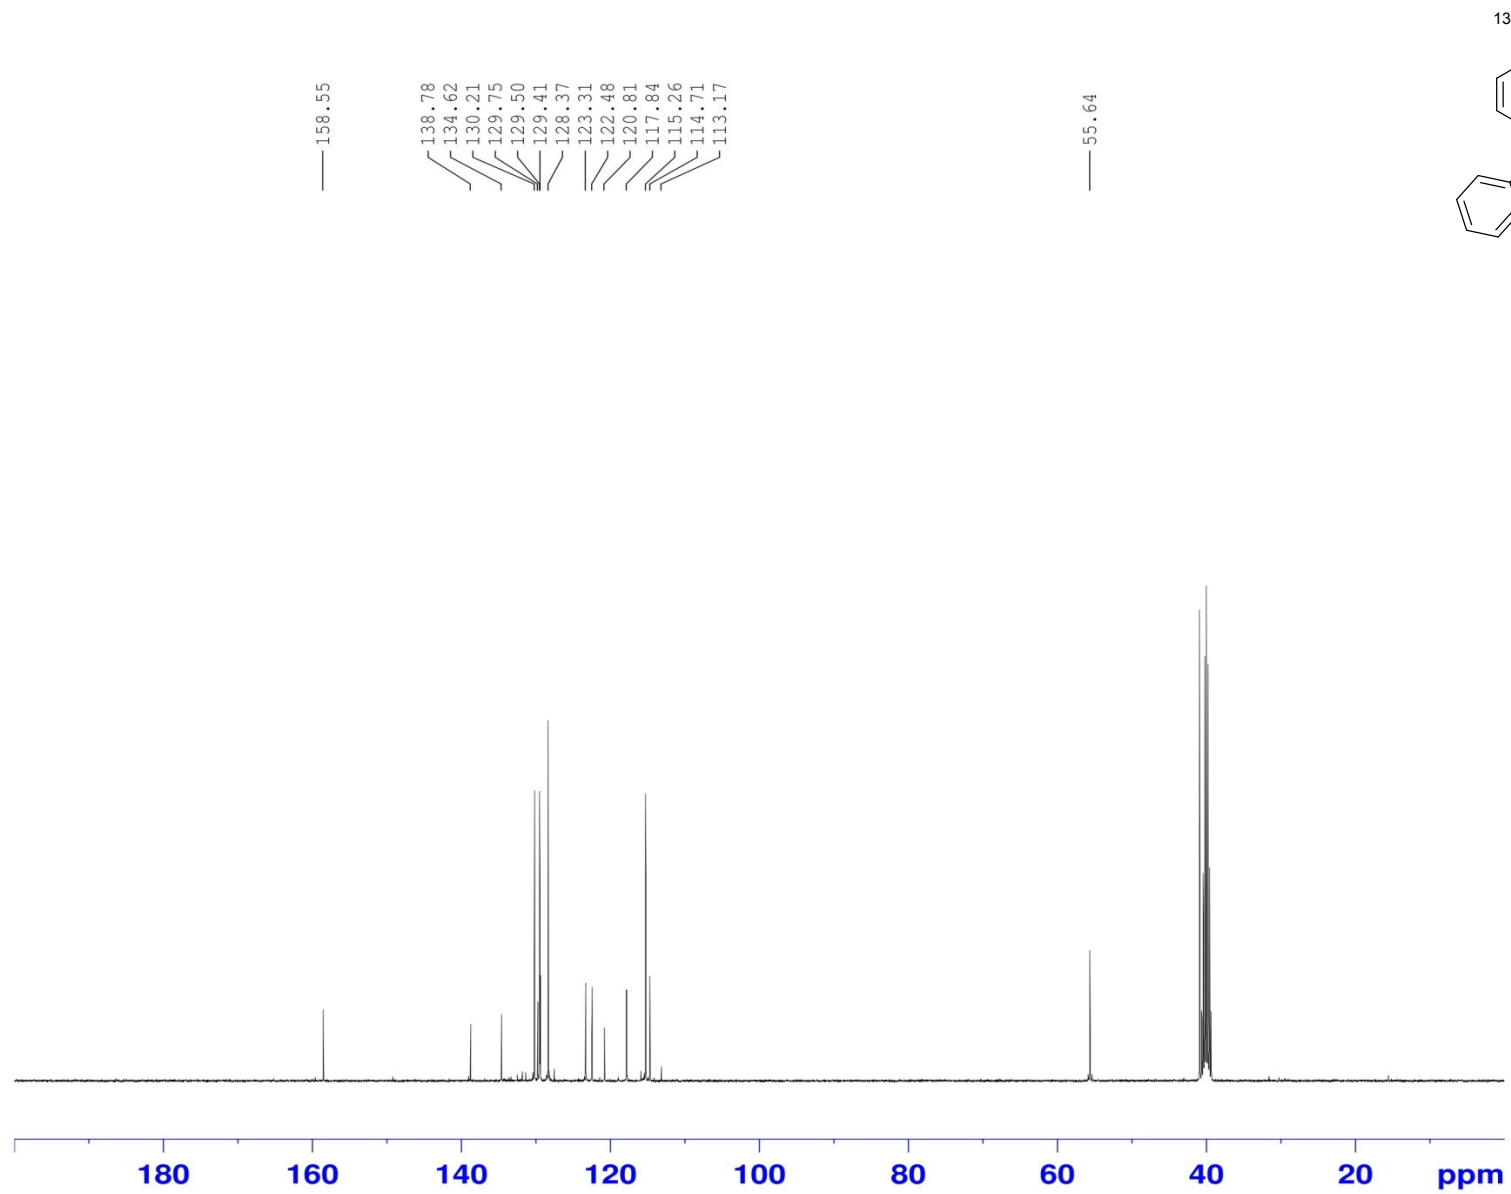

1H NMR of 4d

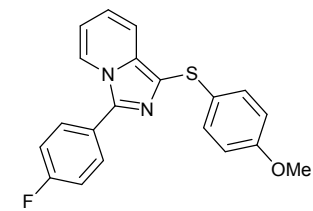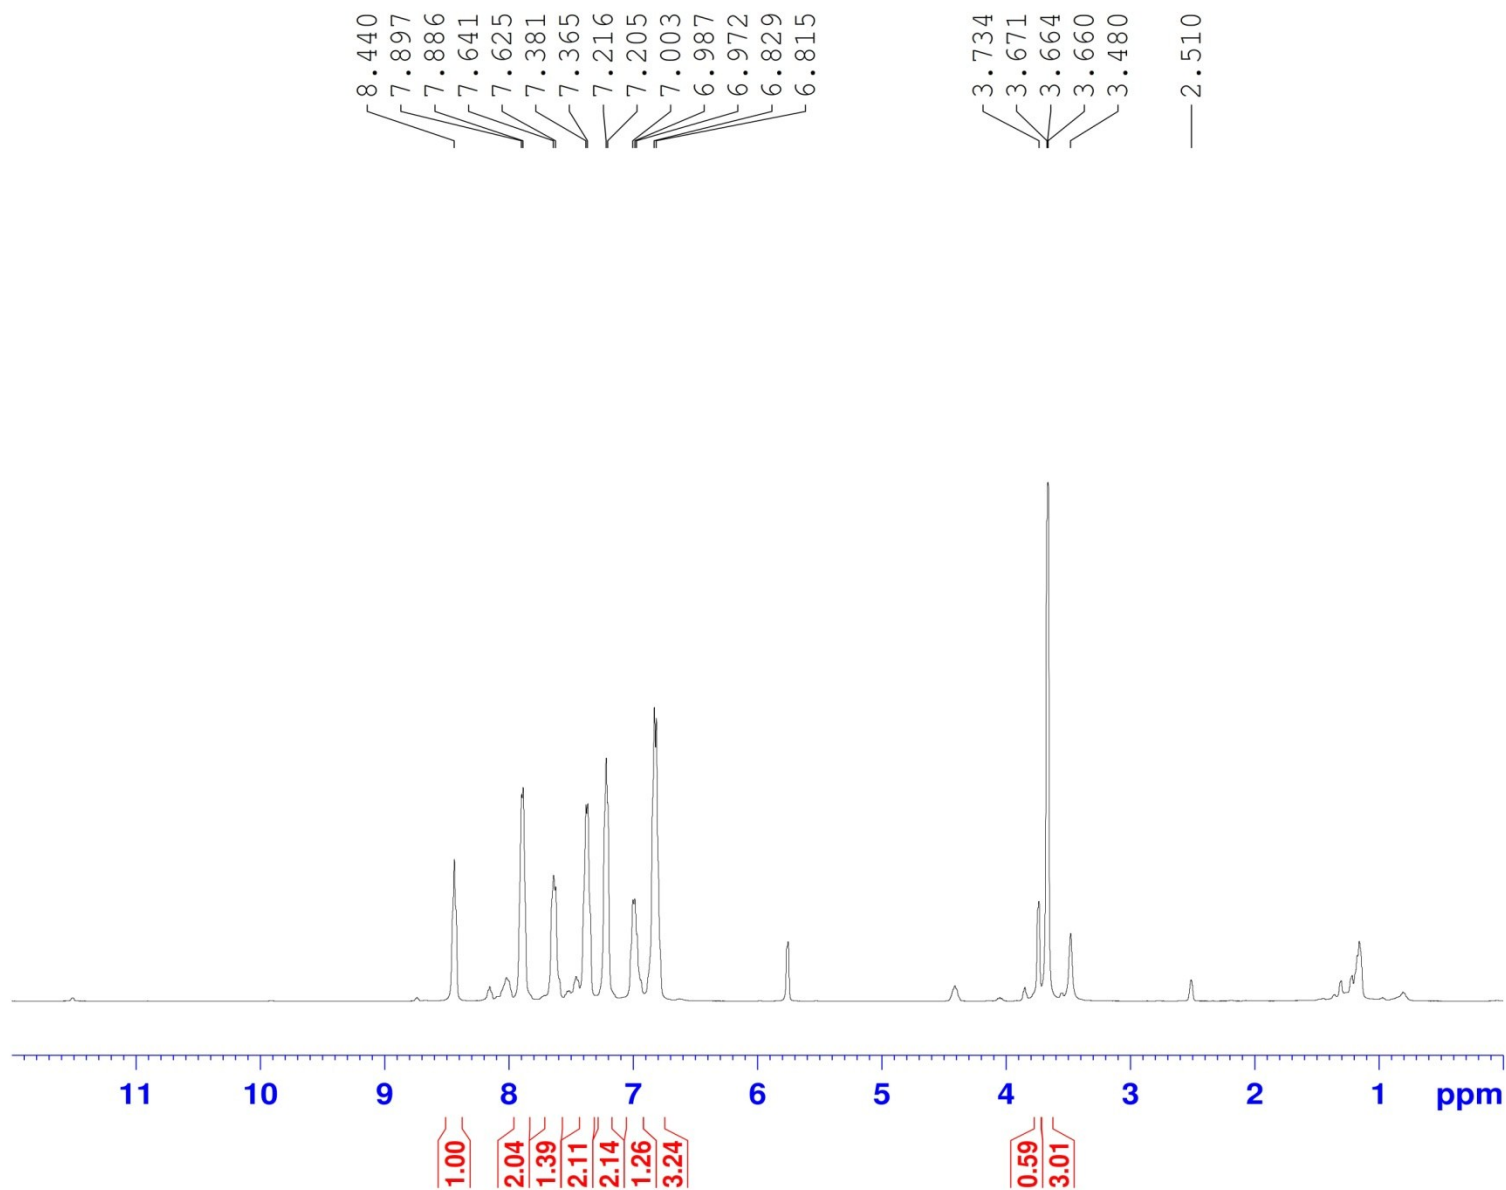

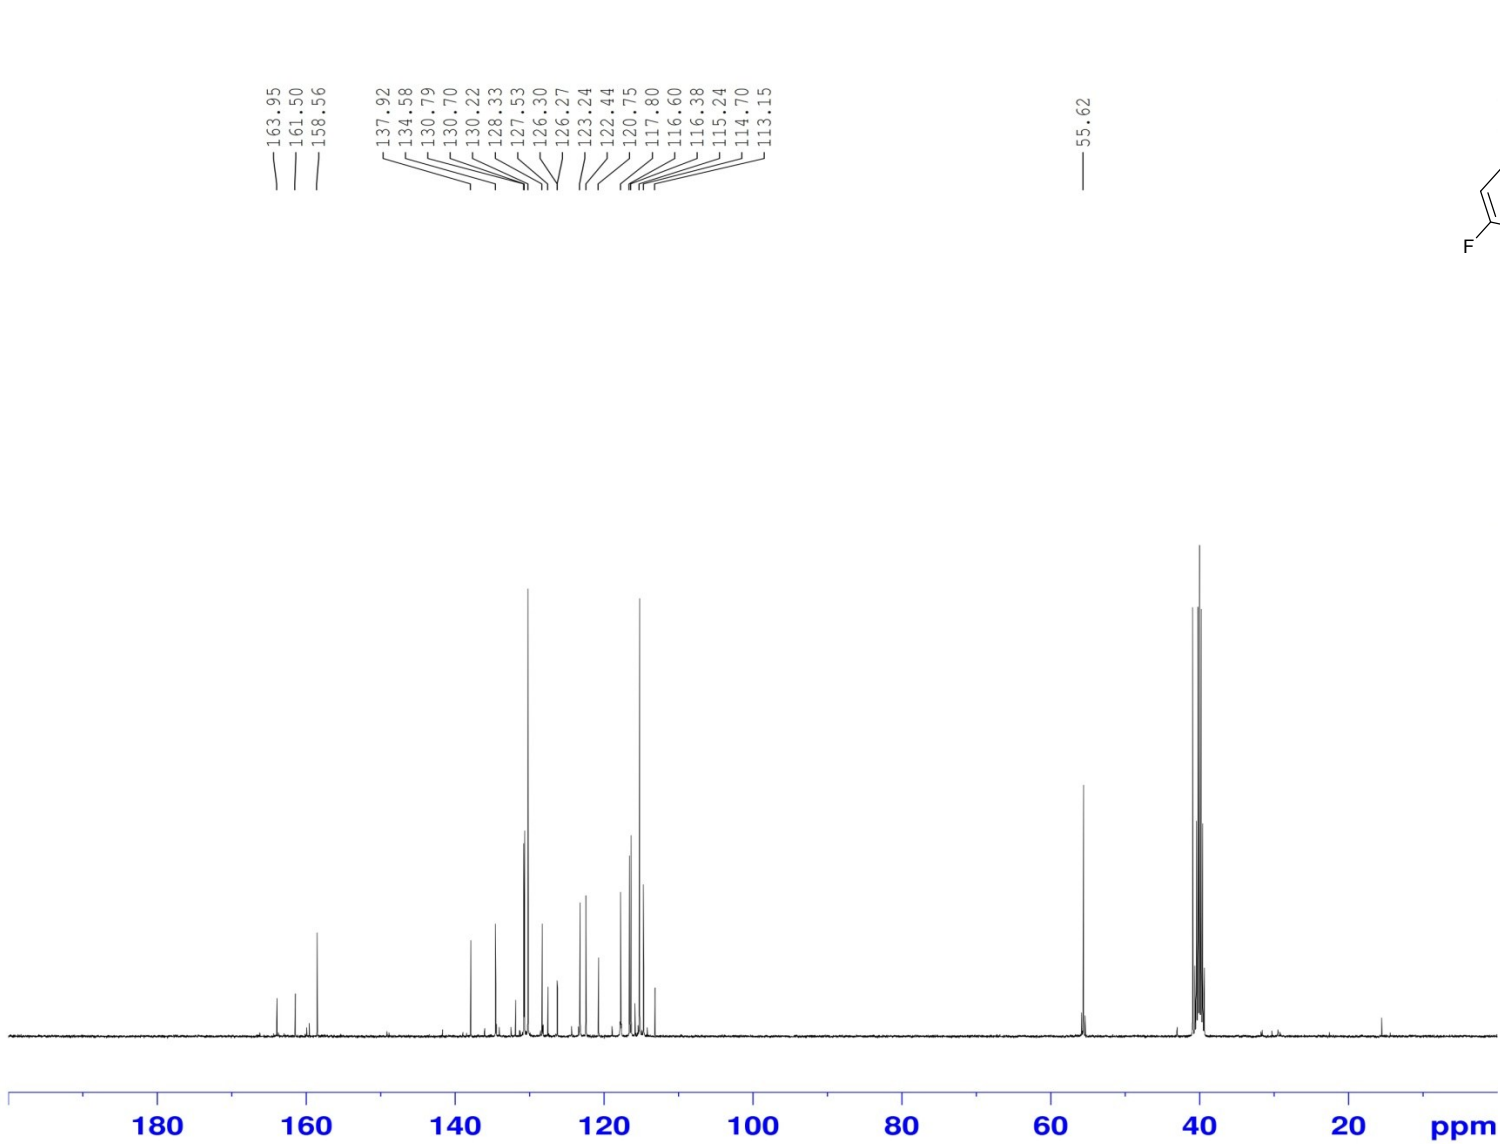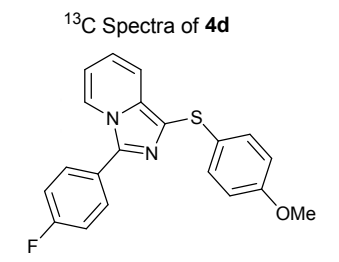

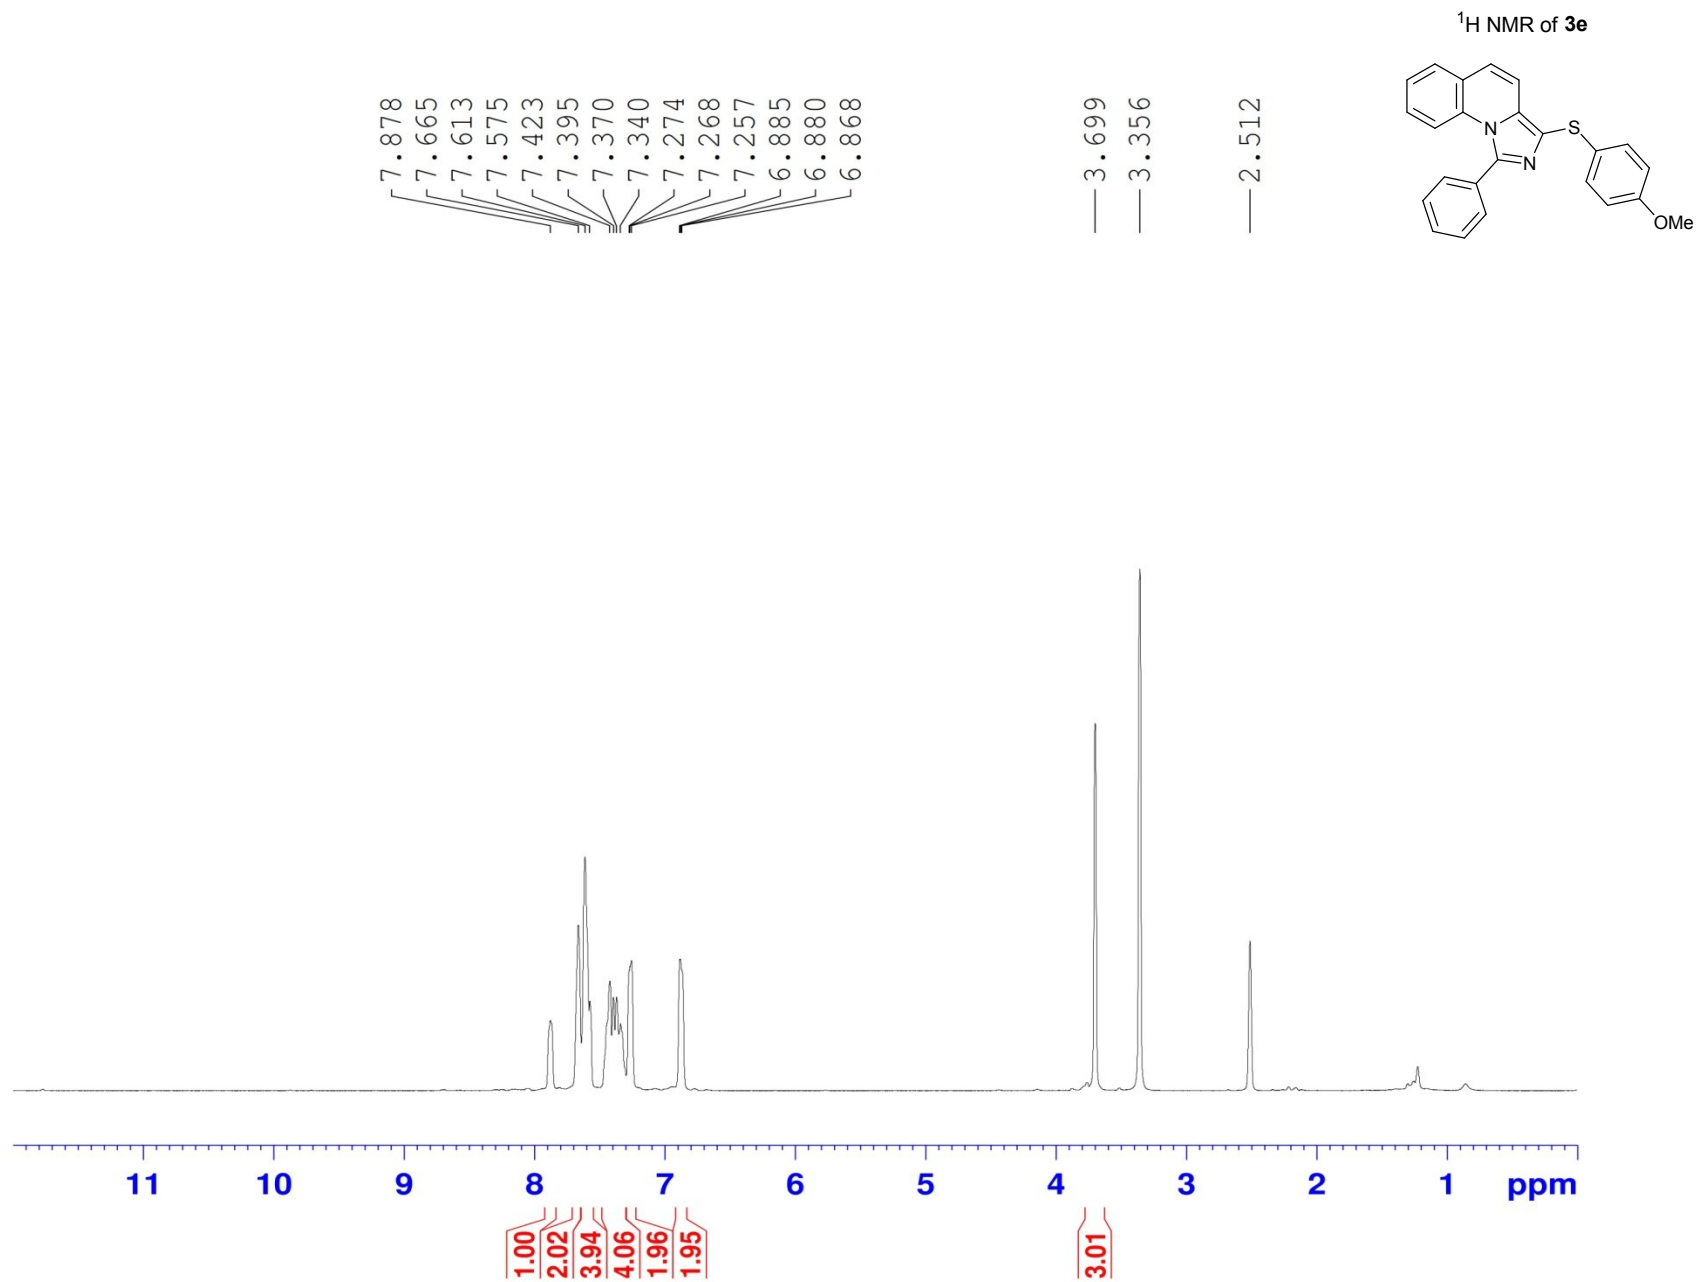

<sup>13</sup>C Spectra of 3e

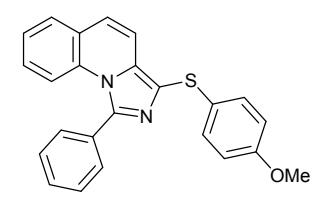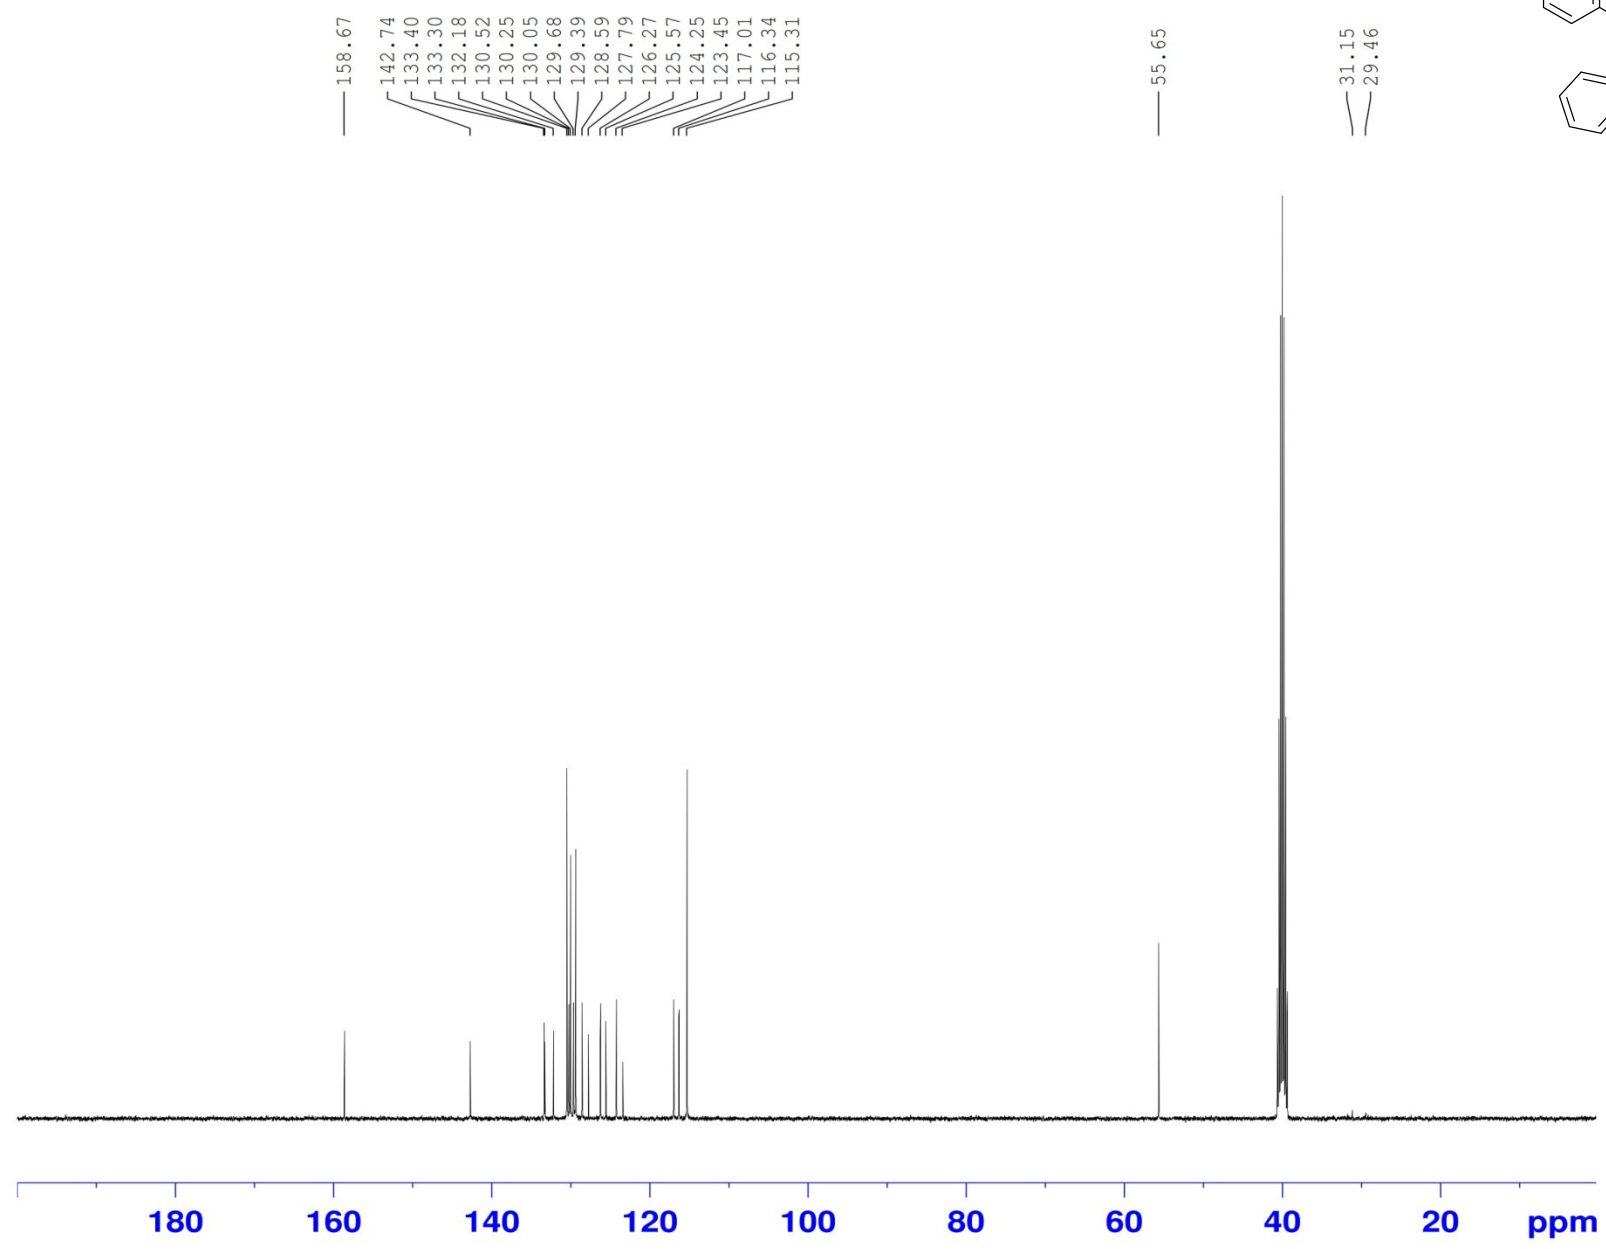

<sup>1</sup>H NMR of 4f

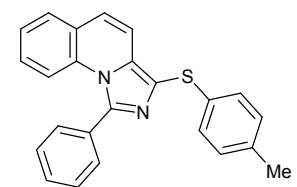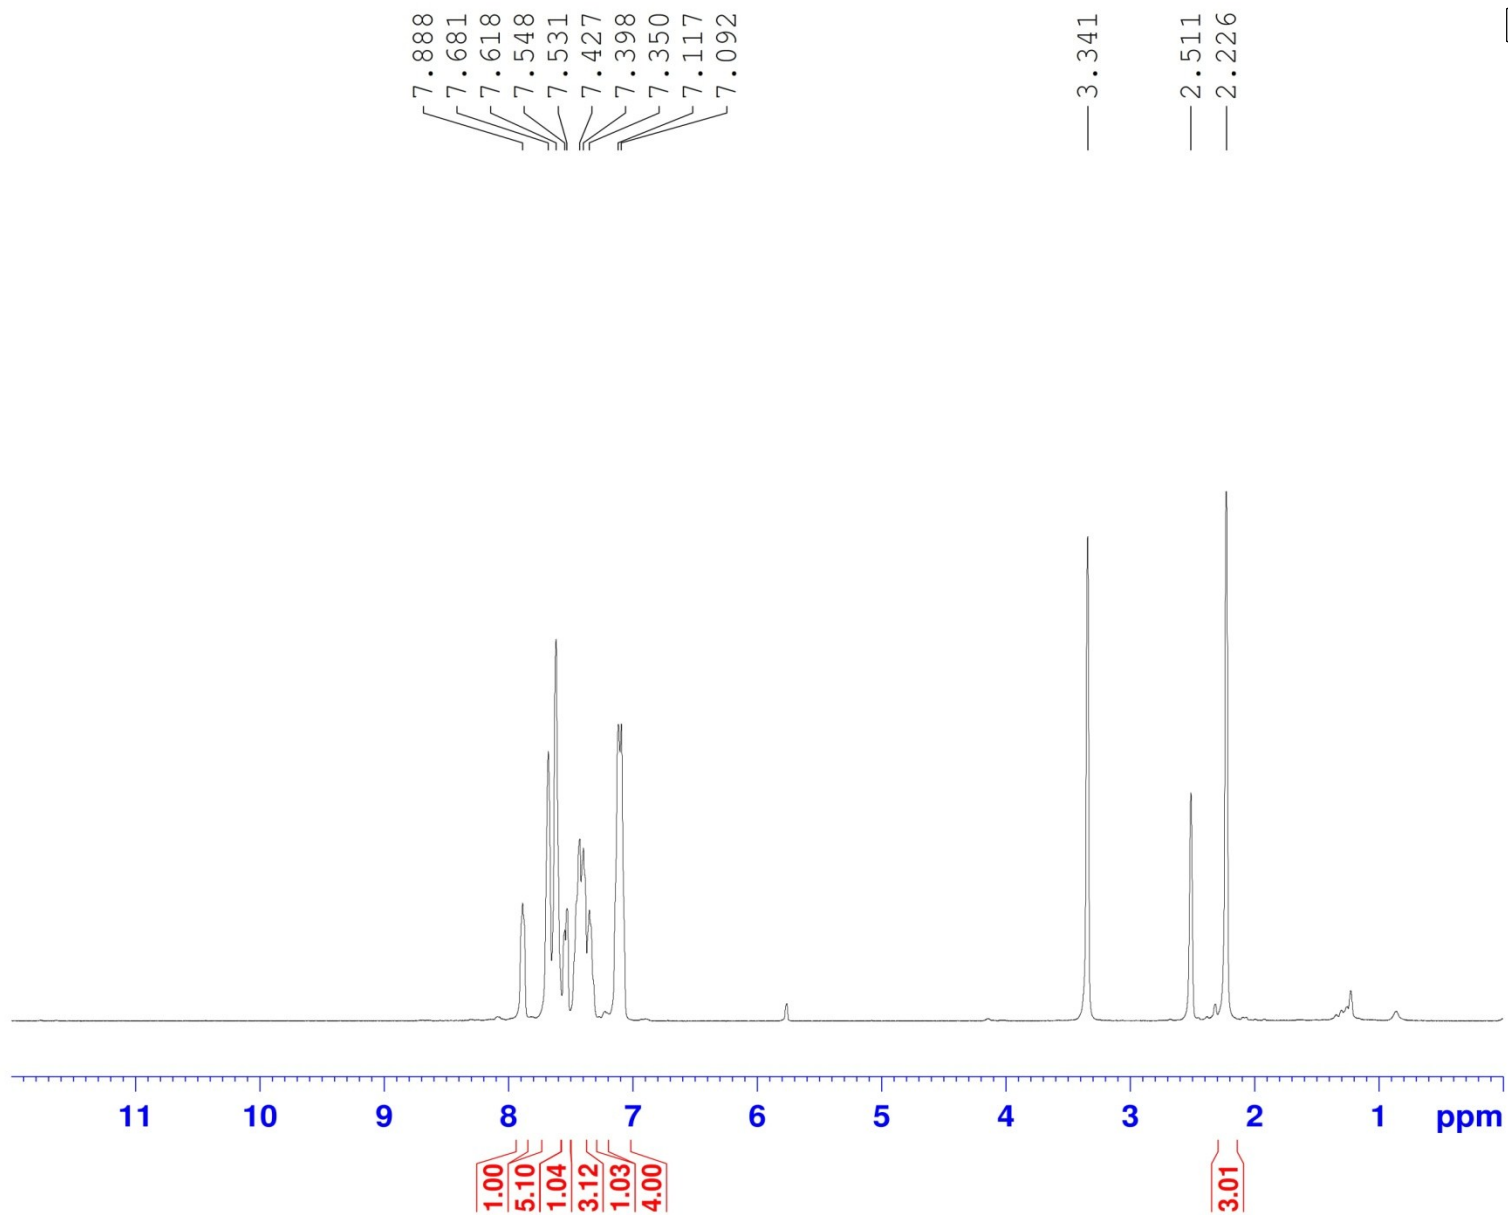

<sup>13</sup>C Spectra of 4f

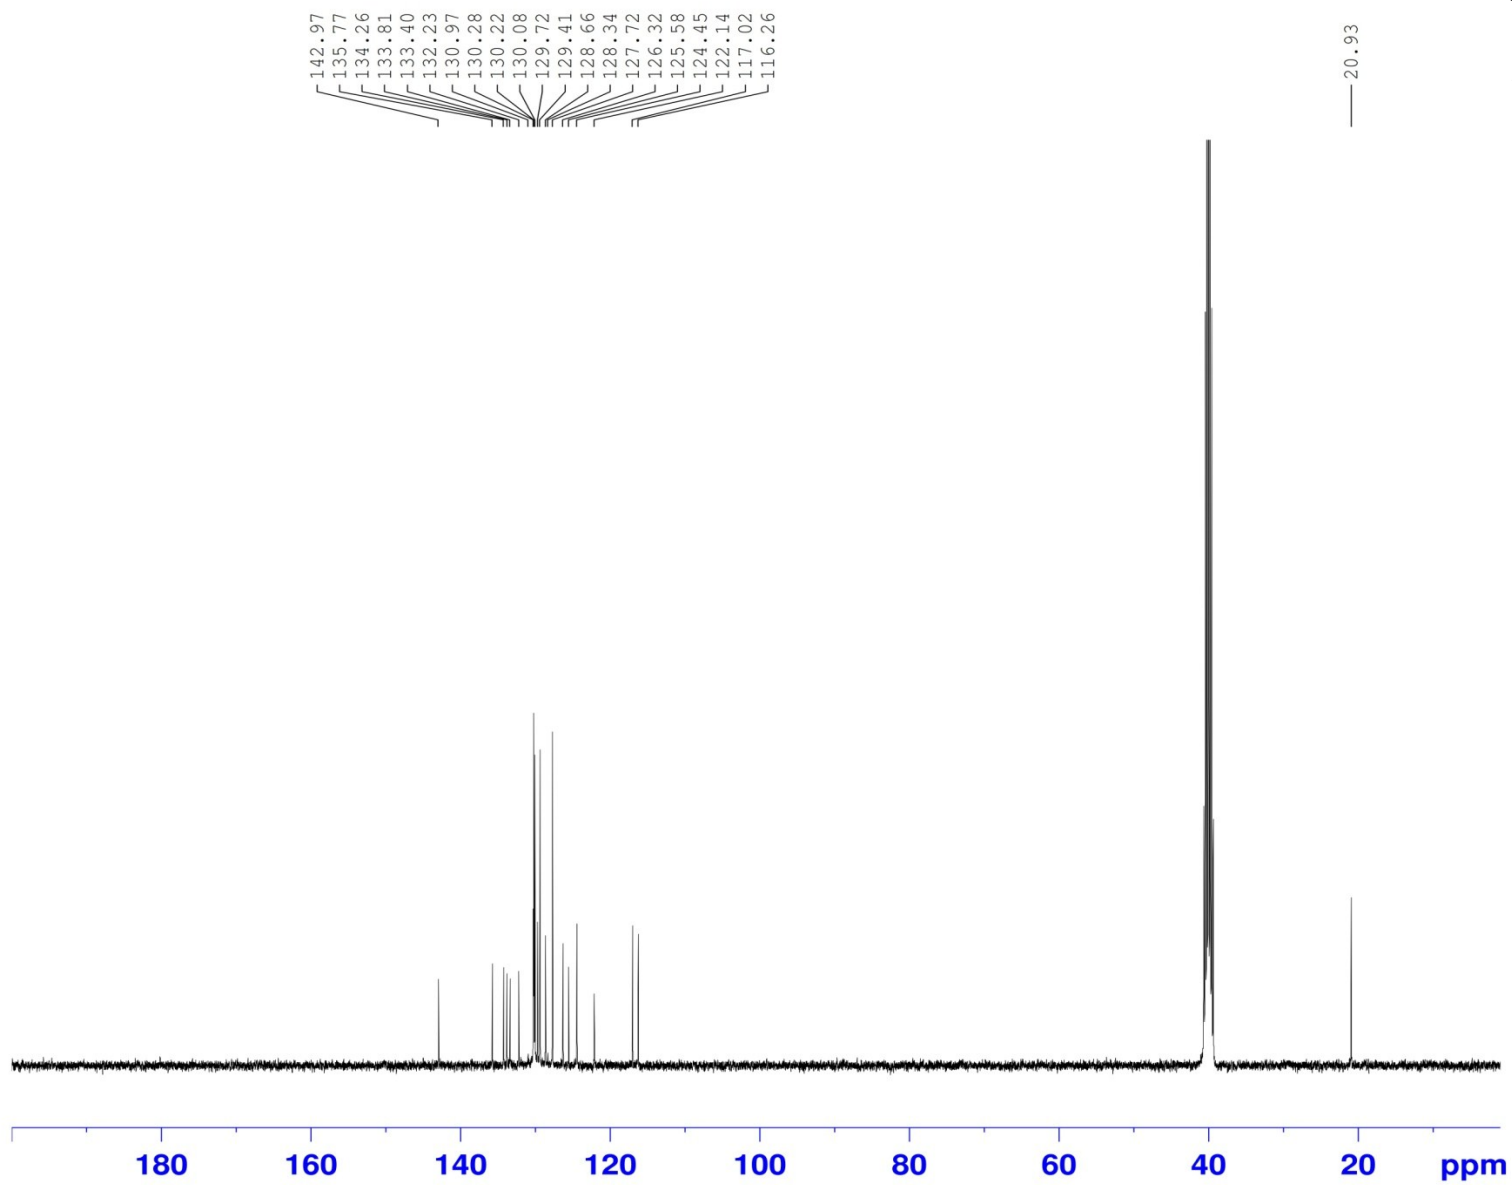



<sup>1</sup>H NMR of 4g

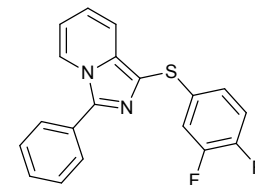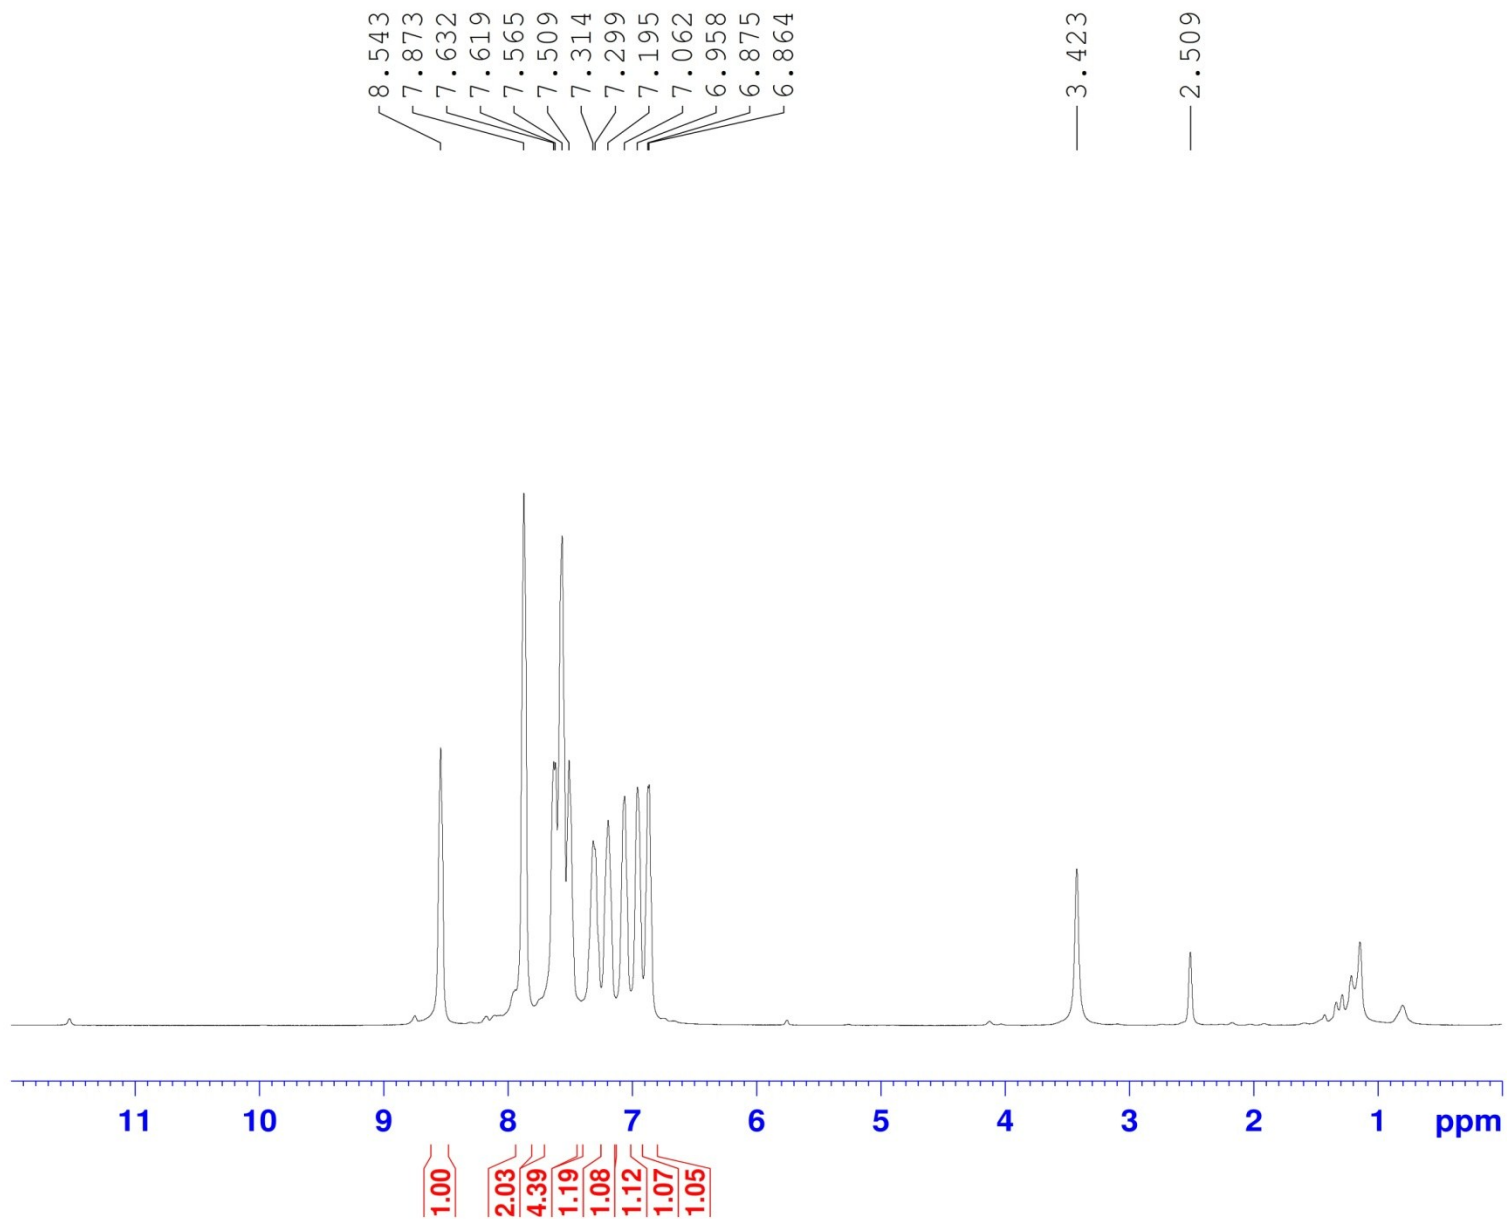

<sup>13</sup>C Spectra of 4g

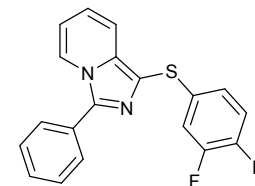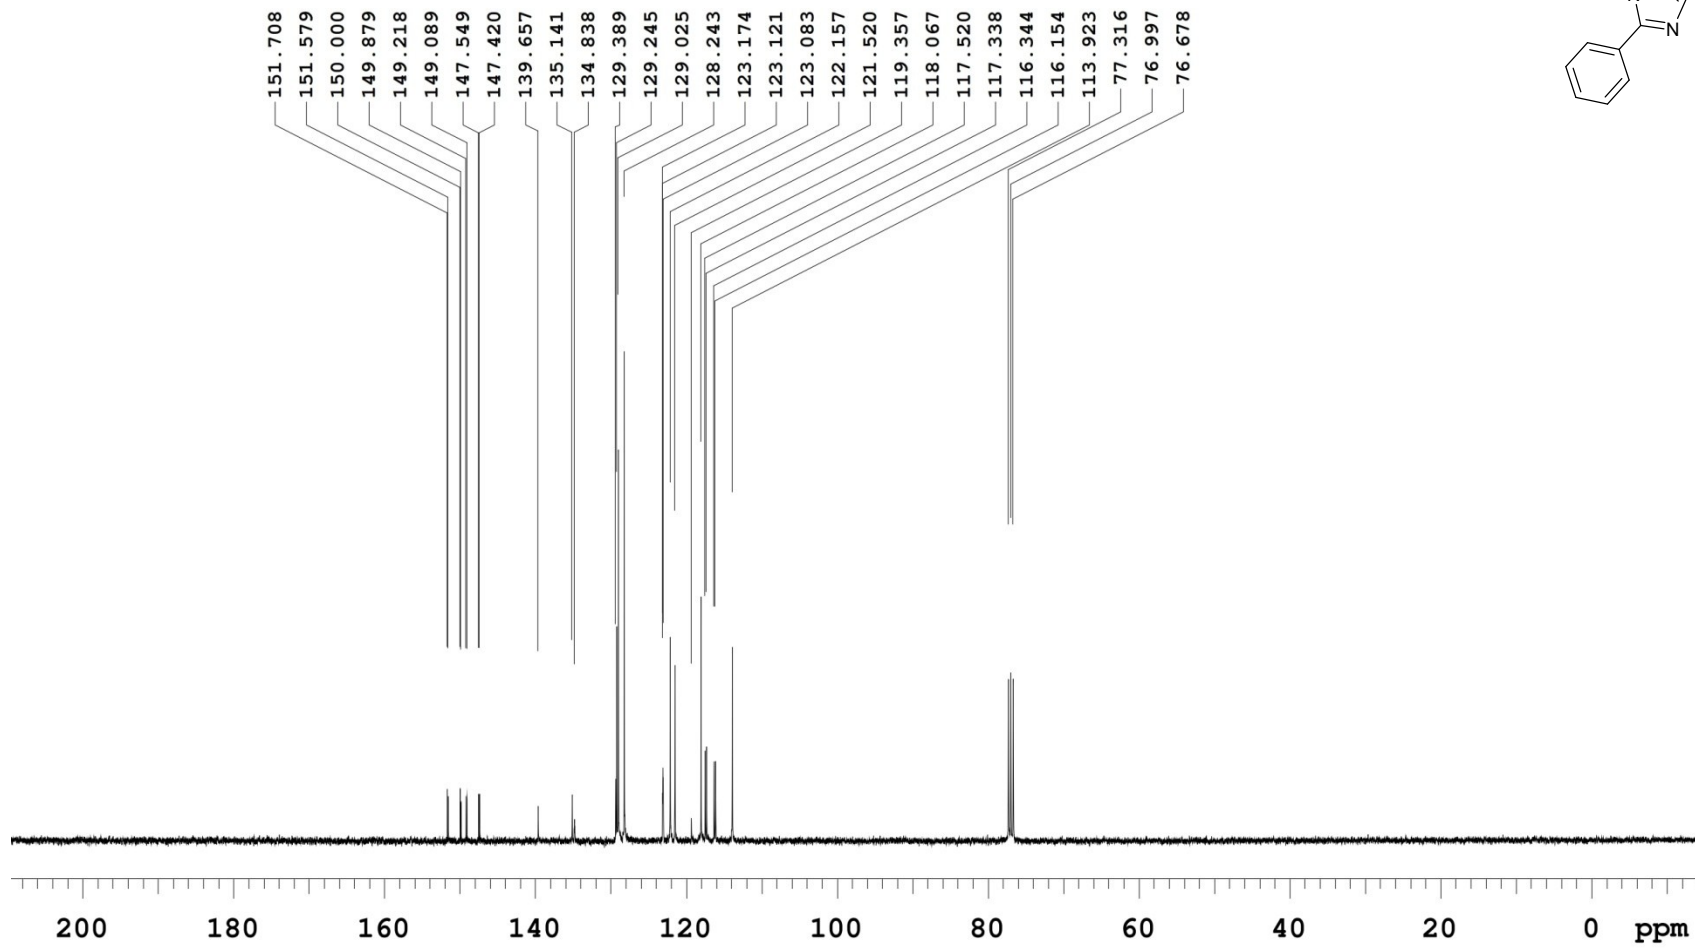

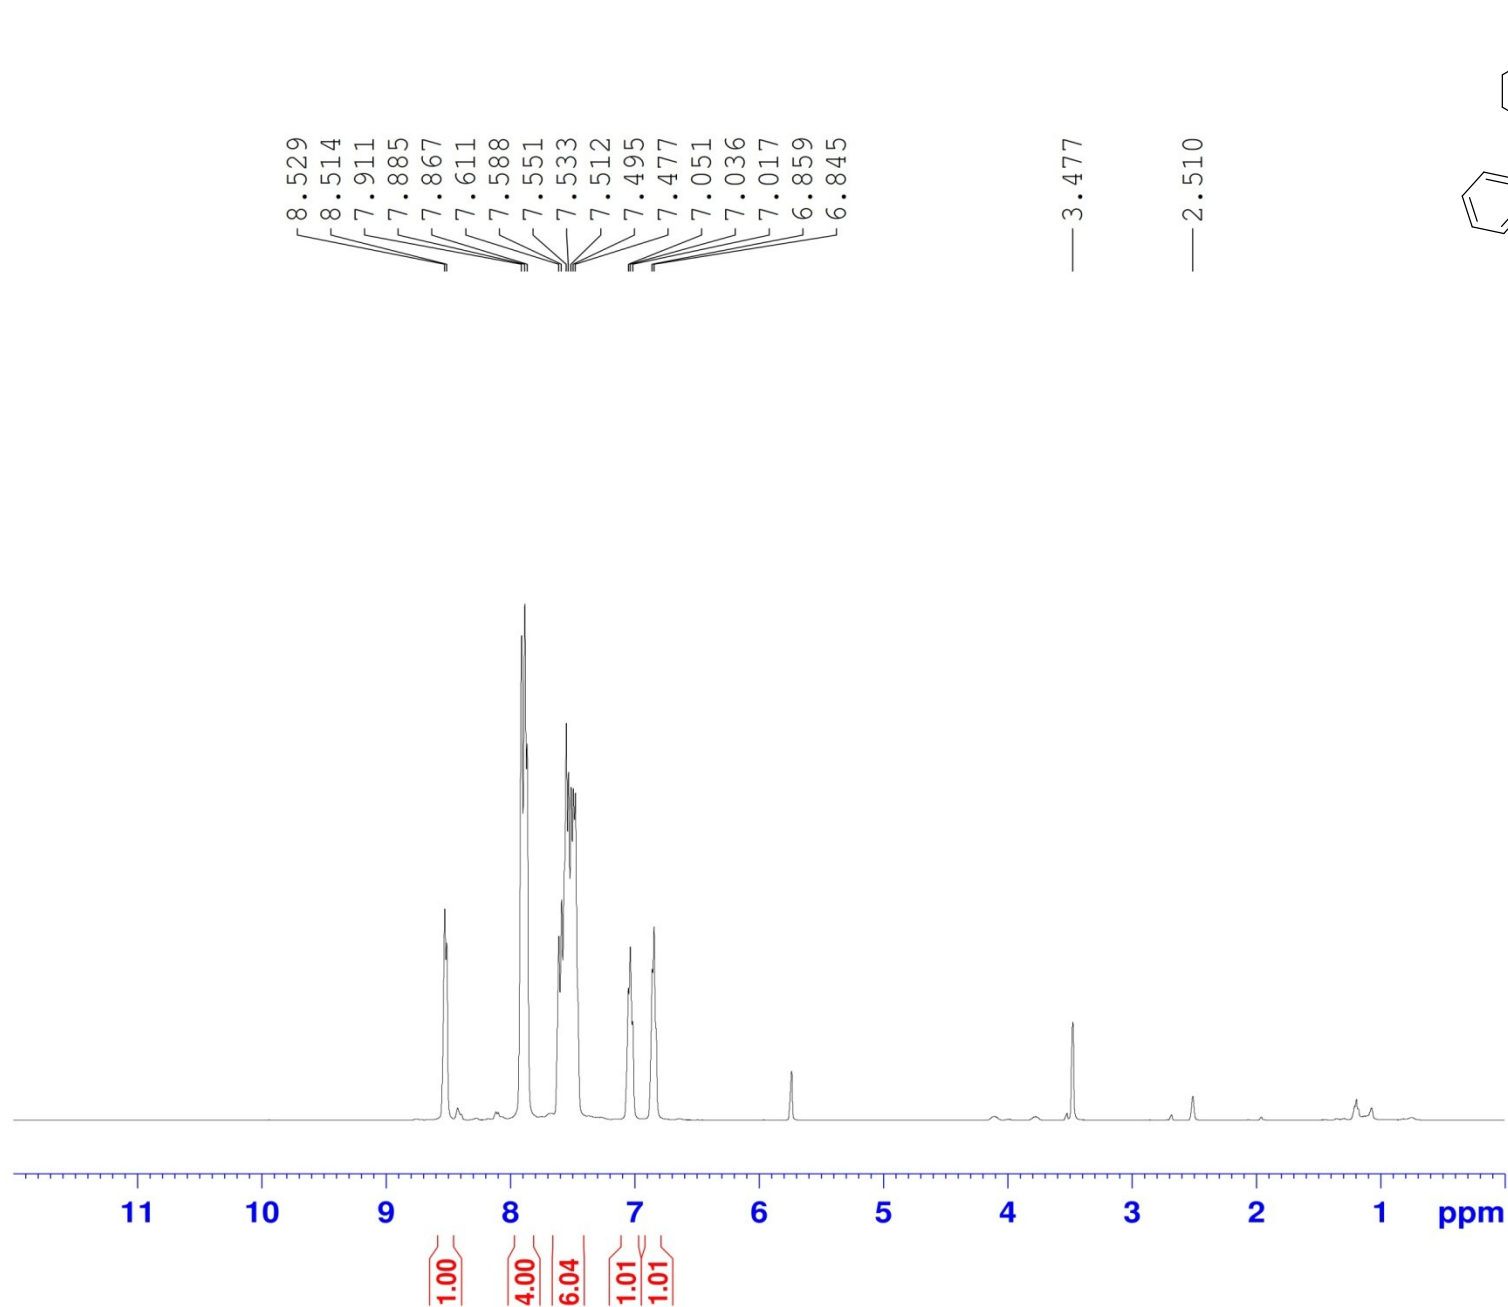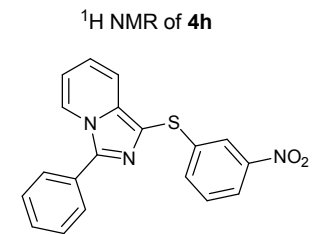

<sup>13</sup>C Spectra of 4h

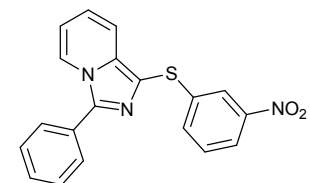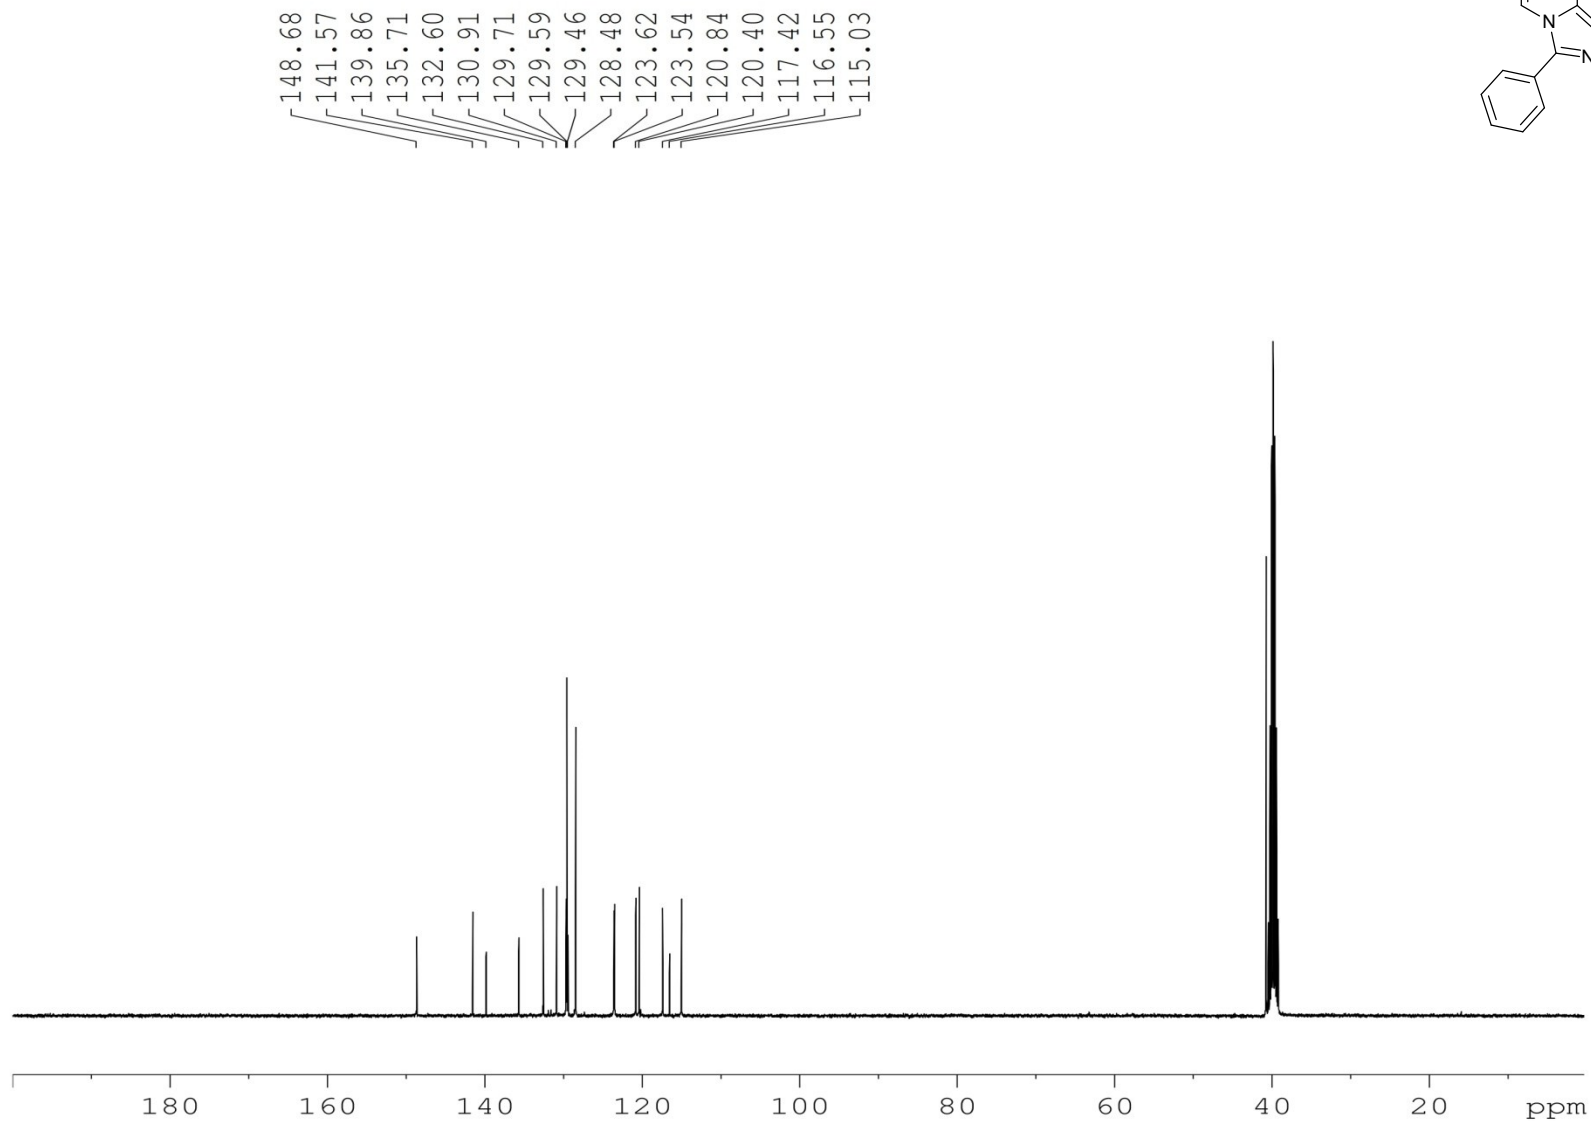

1H NMR of 4i

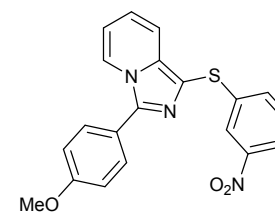

8.623  
7.984  
7.978  
7.940  
7.692  
7.684  
7.671  
7.560  
7.532  
7.522  
7.514  
7.468  
7.410  
7.118  
6.935  
6.921

— 3.864

— 3.342

— 2.510

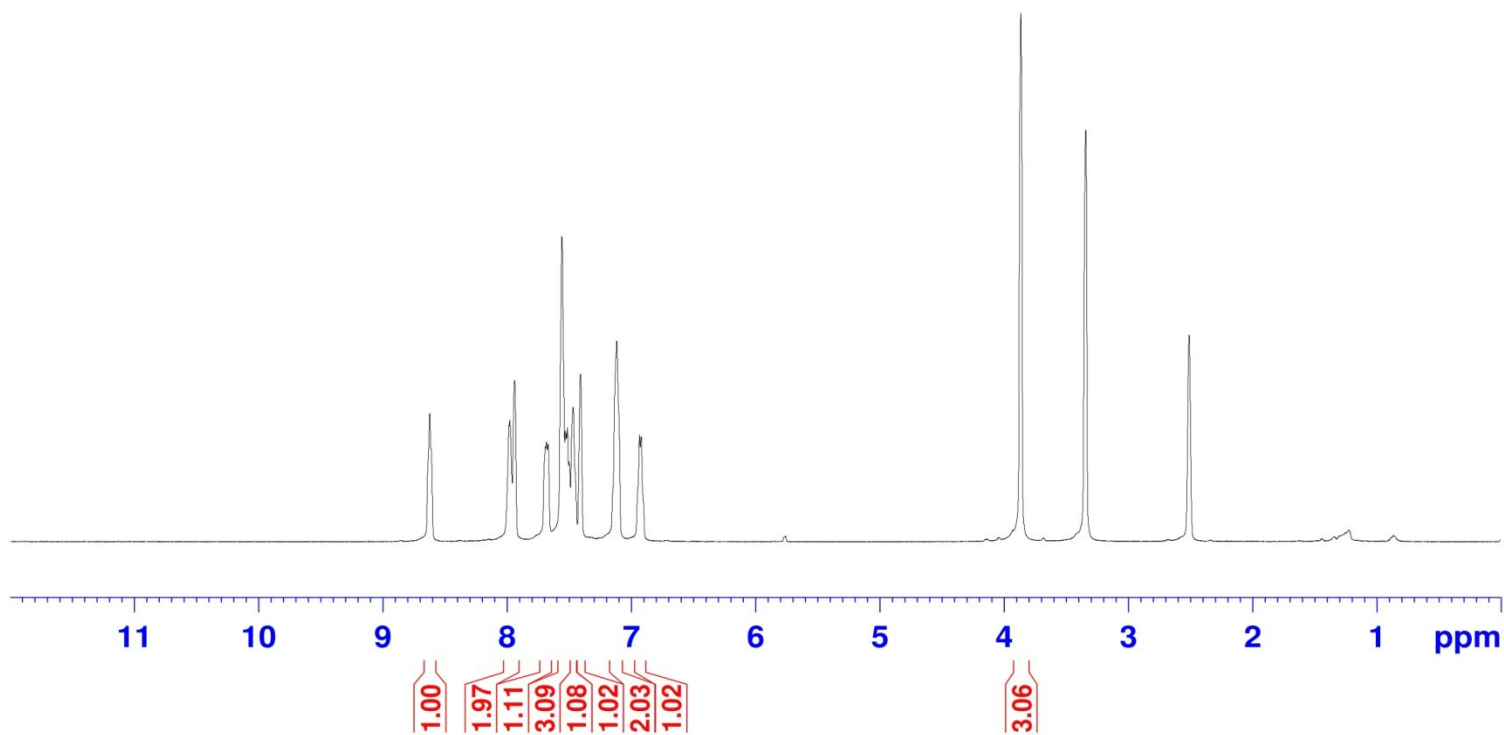

<sup>13</sup>C Spectra of 4i

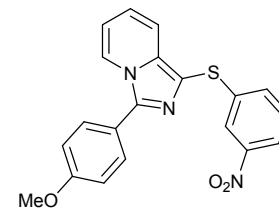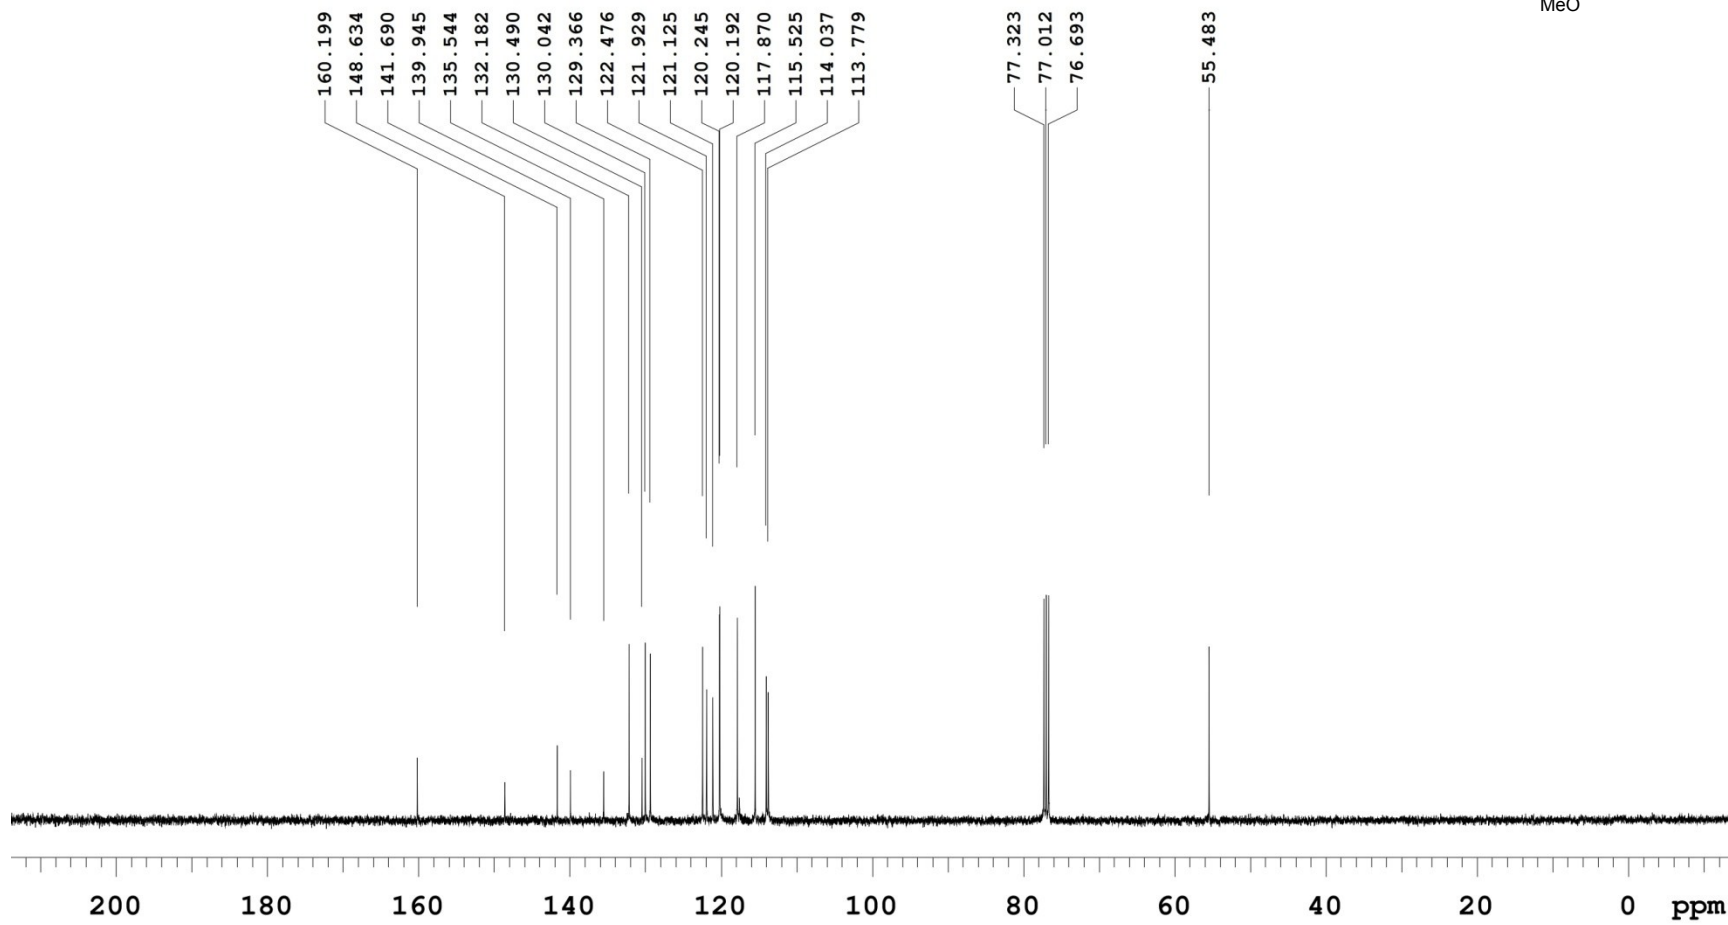

<sup>1</sup>H NMR of 4j

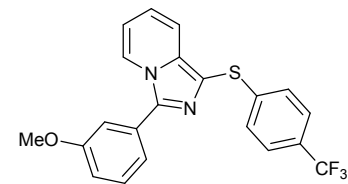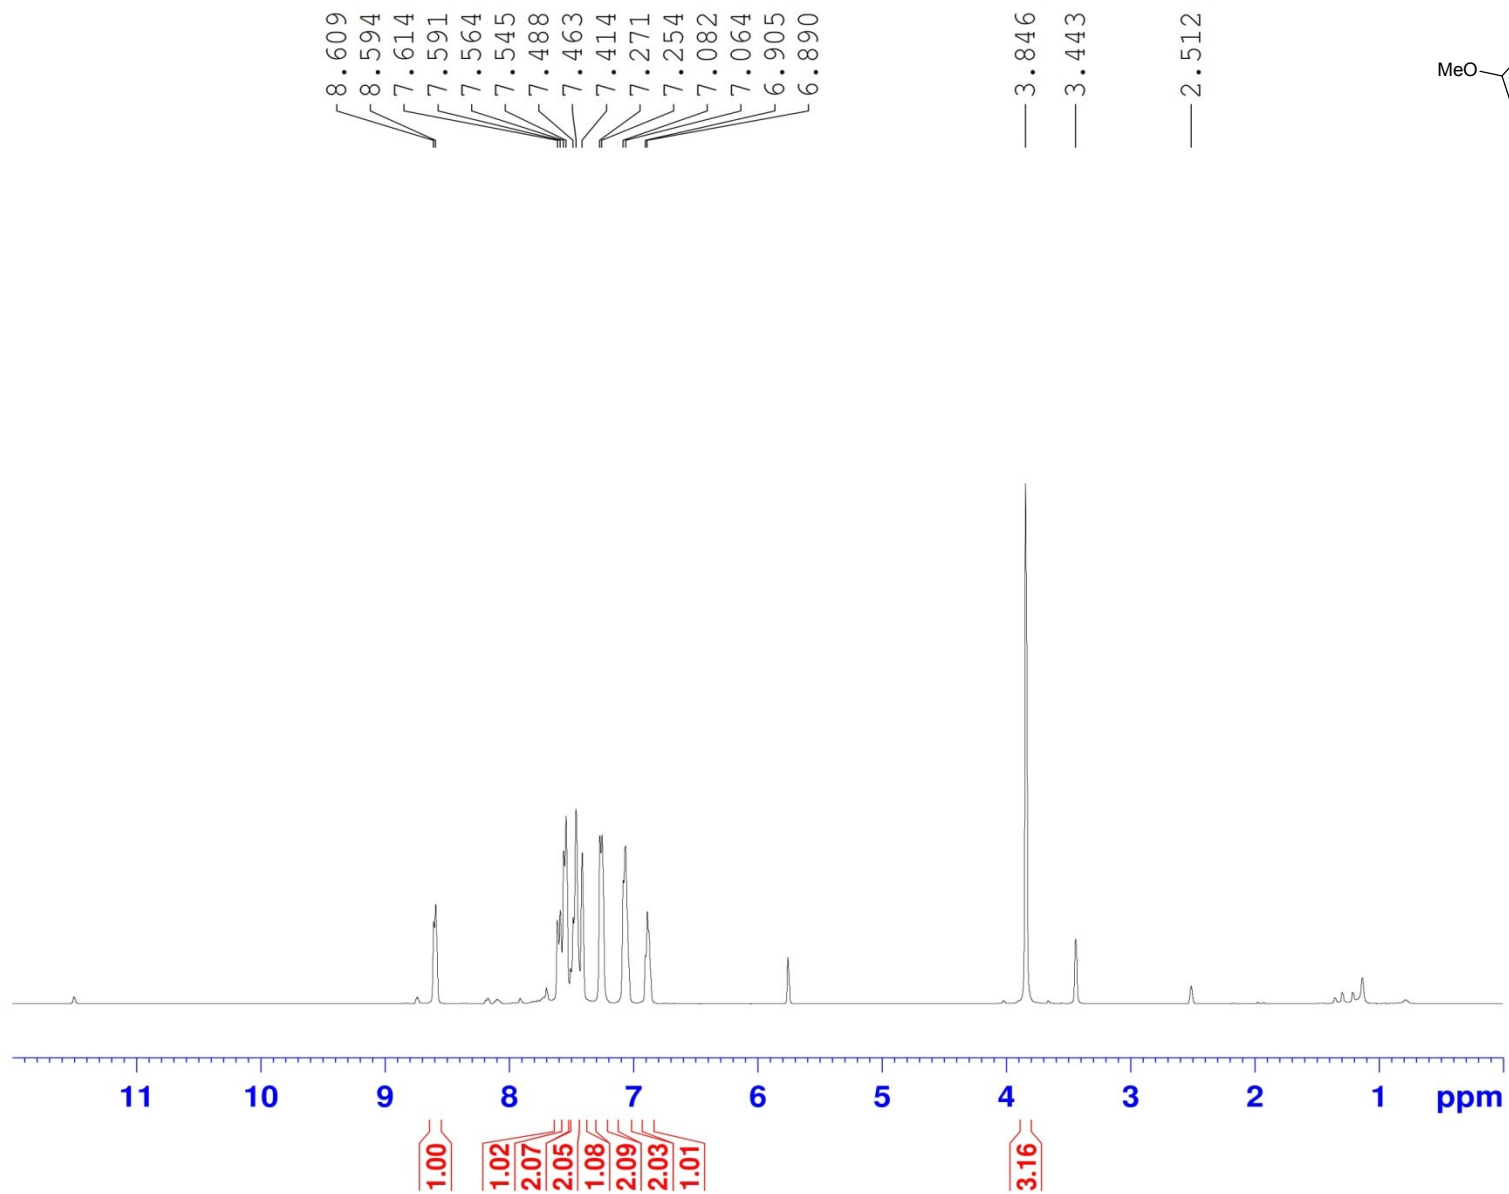

<sup>13</sup>C Spectra of 4j

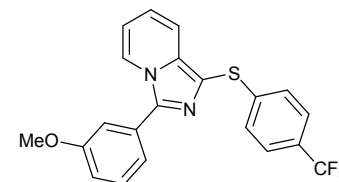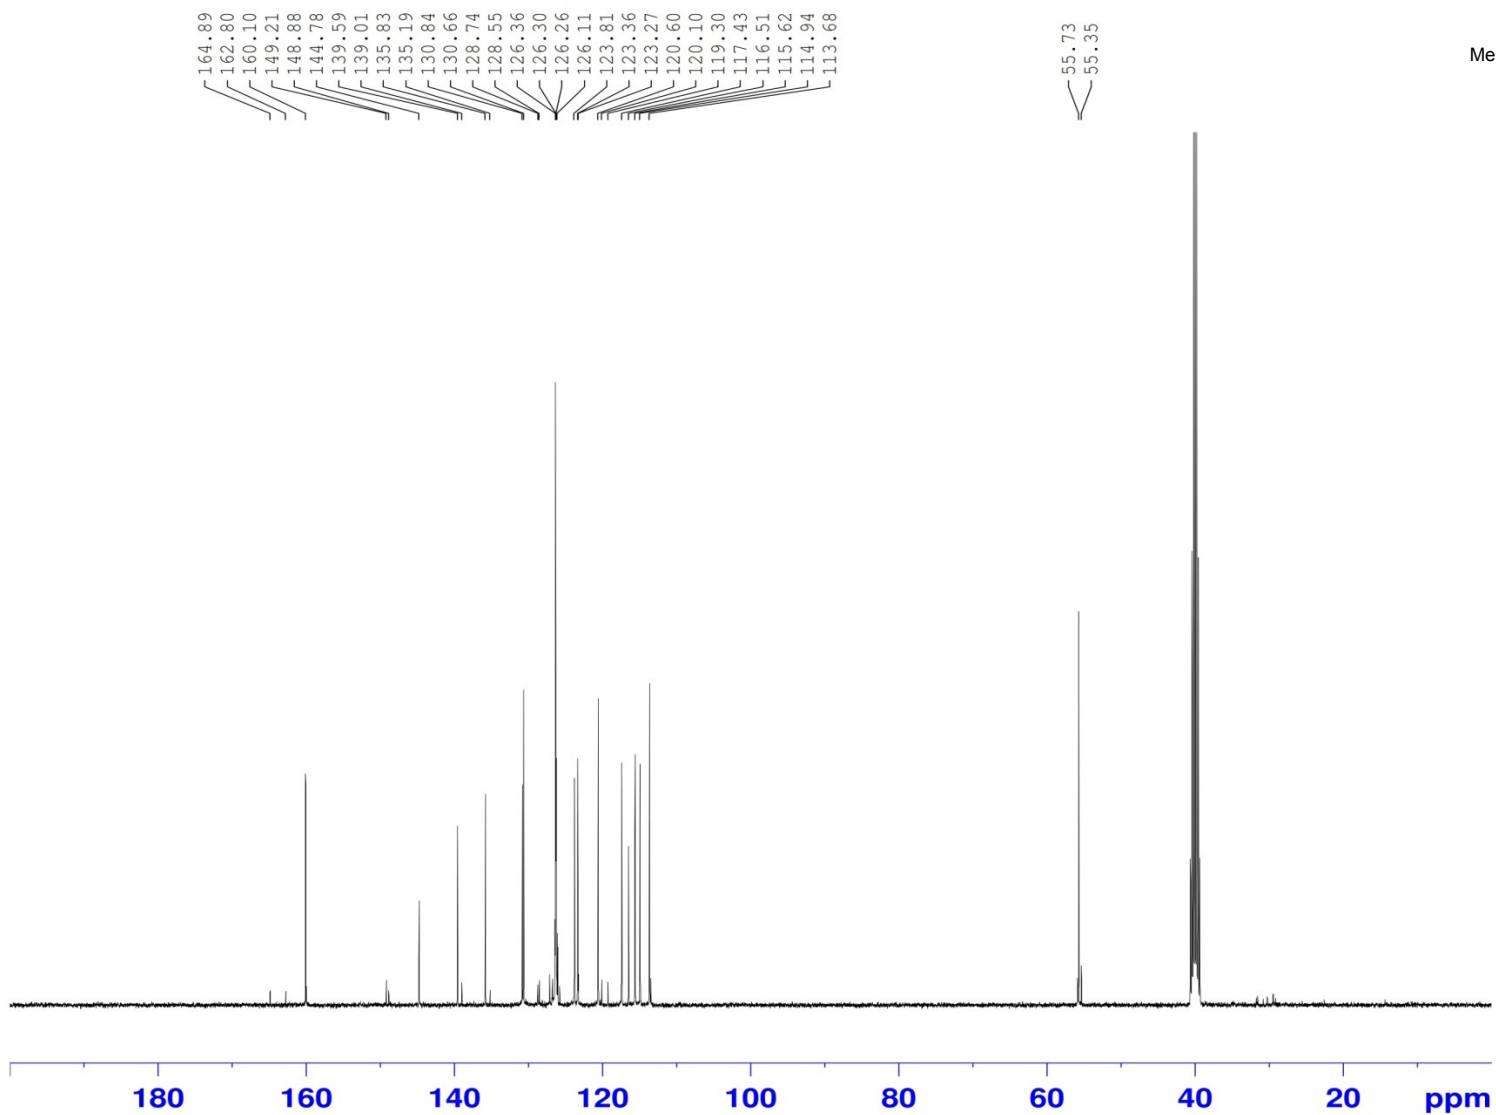



<sup>1</sup>H NMR of 4k

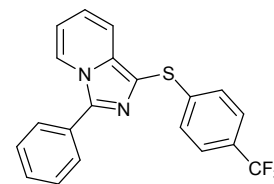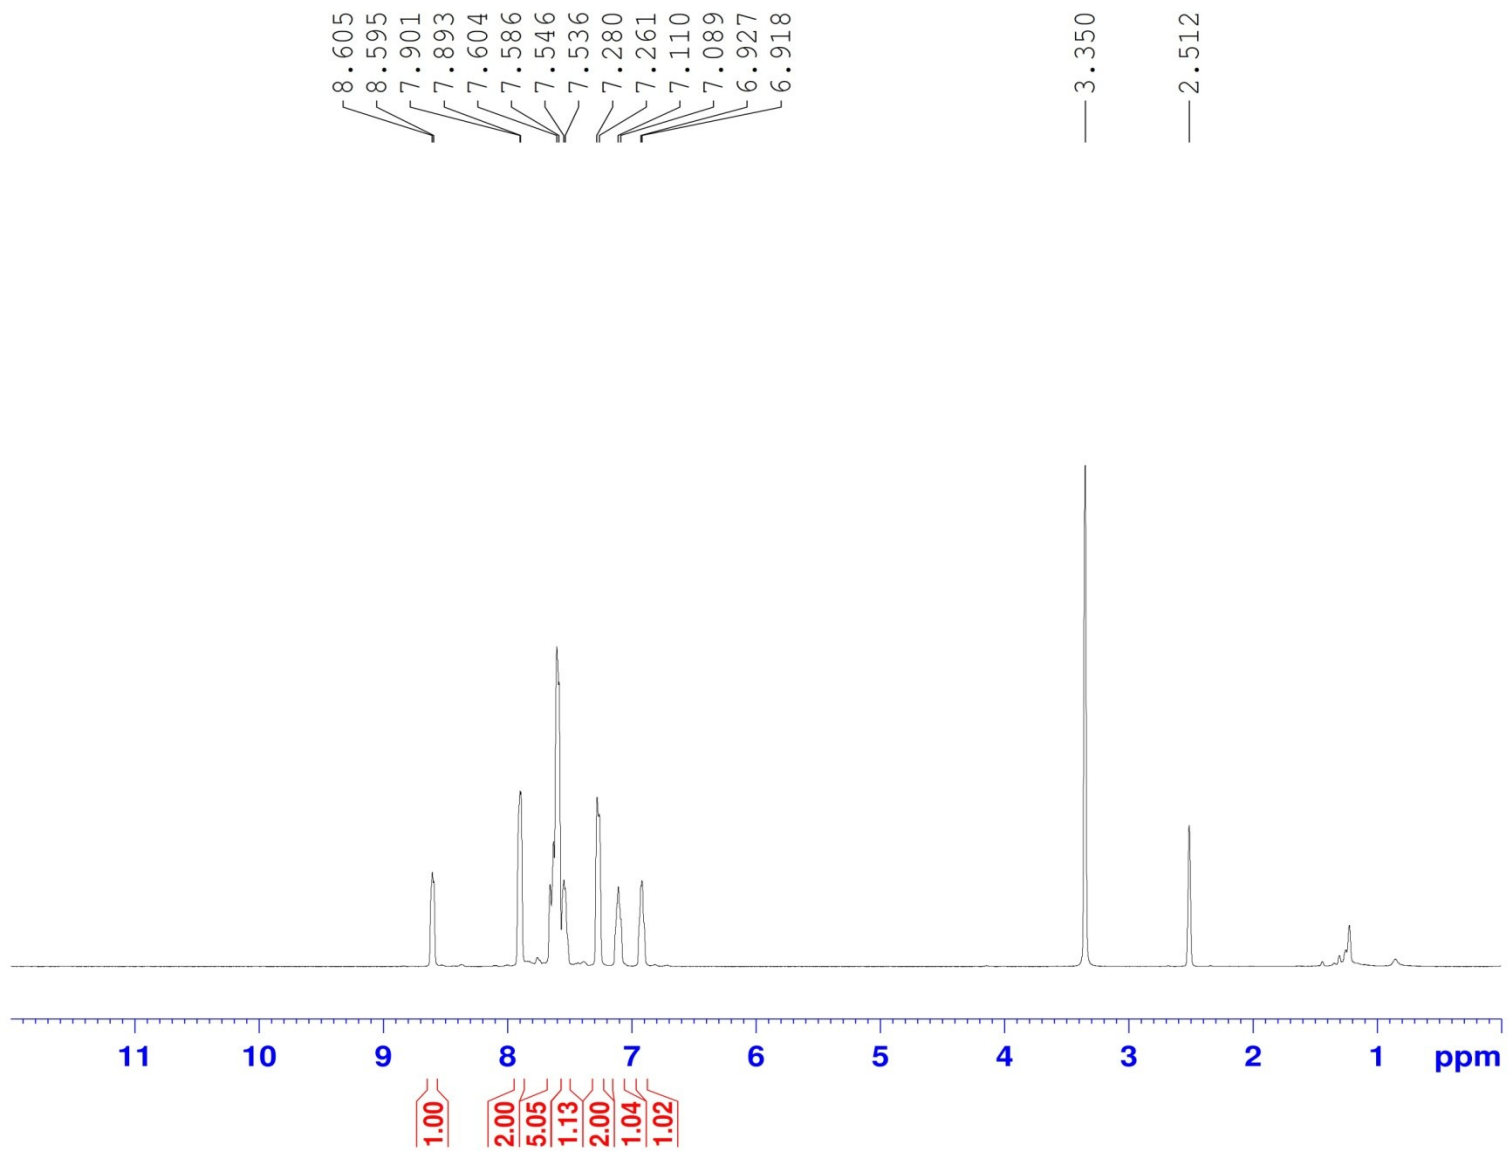

<sup>13</sup>C NMR of 4k

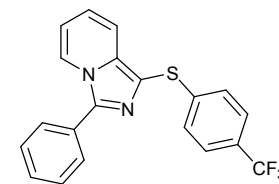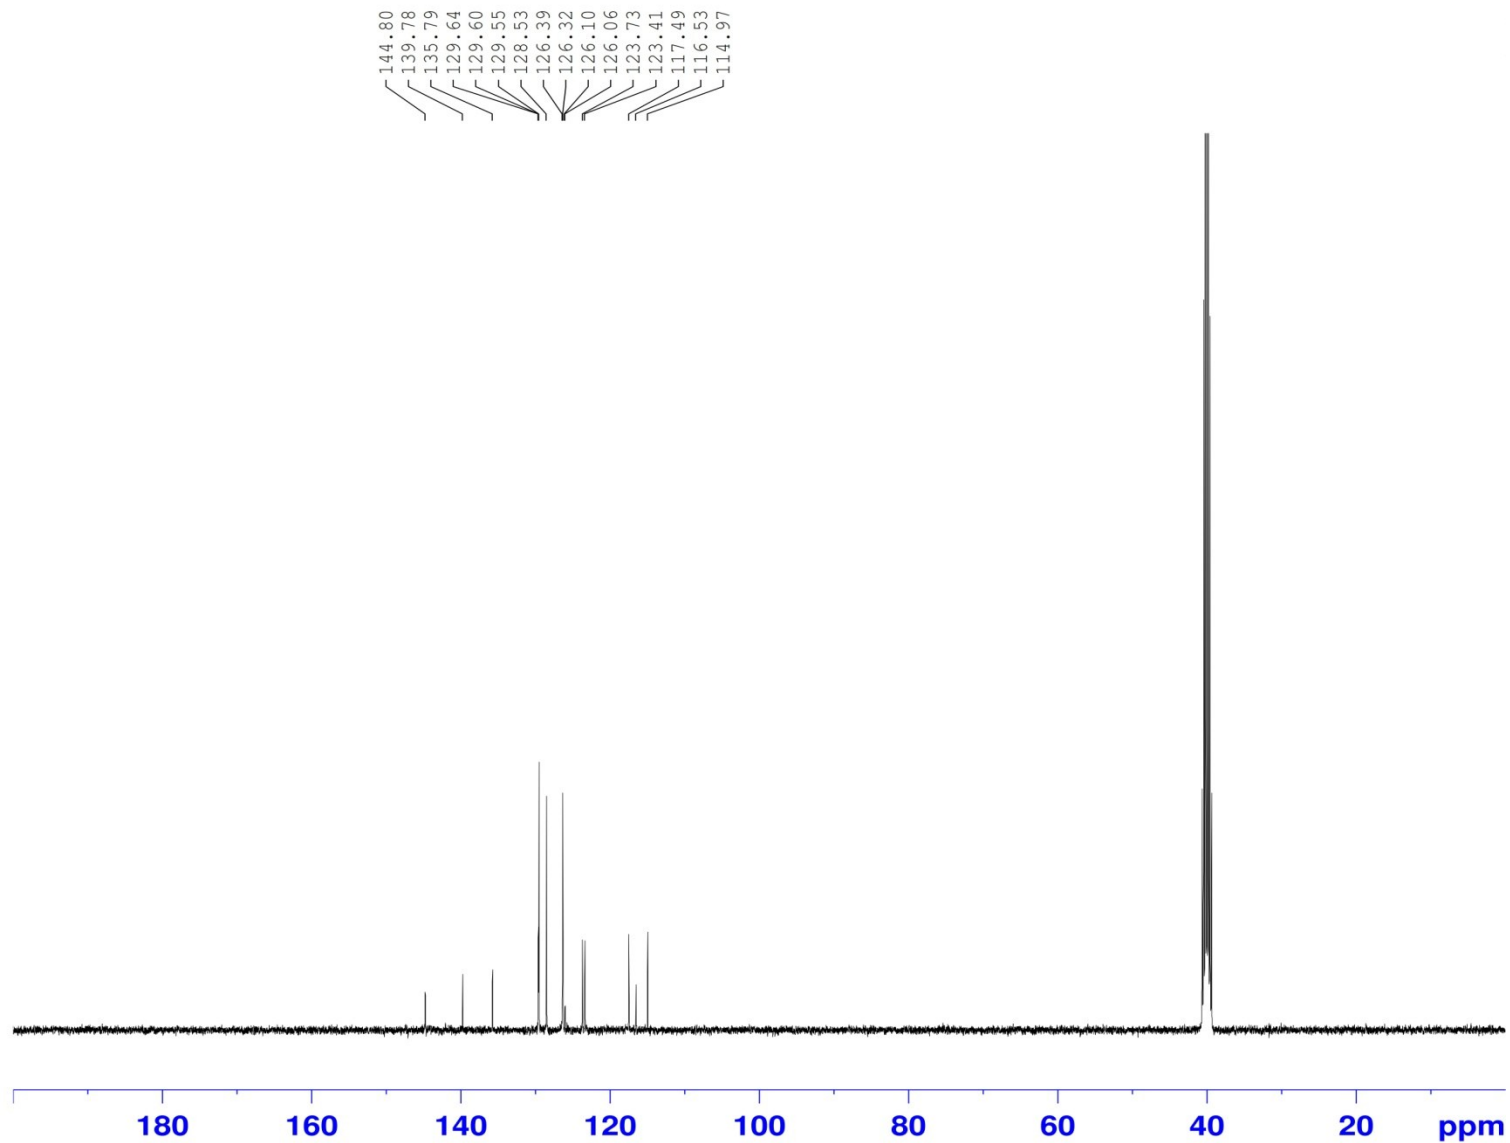

<sup>1</sup>H NMR of 4l

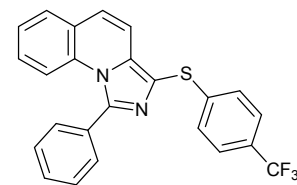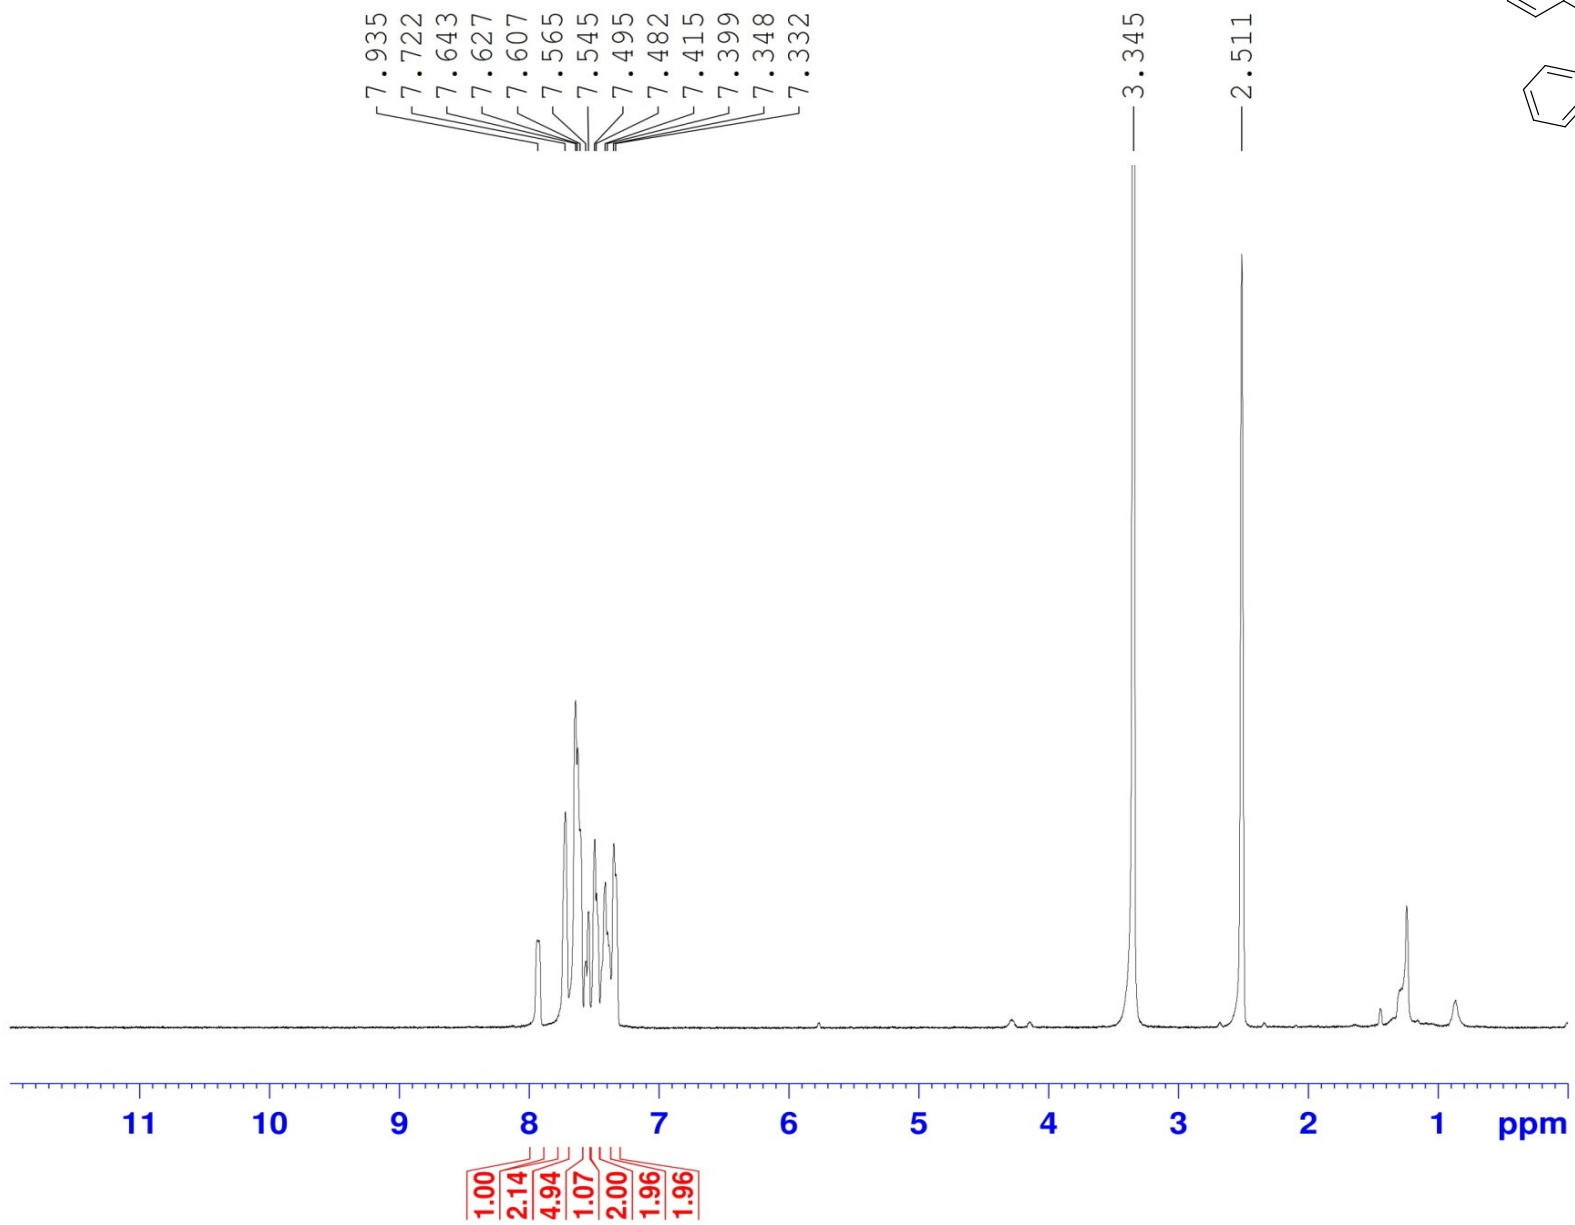

<sup>13</sup>C Spectra of 4I

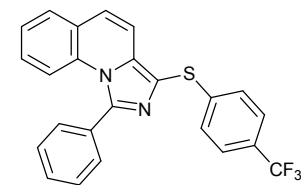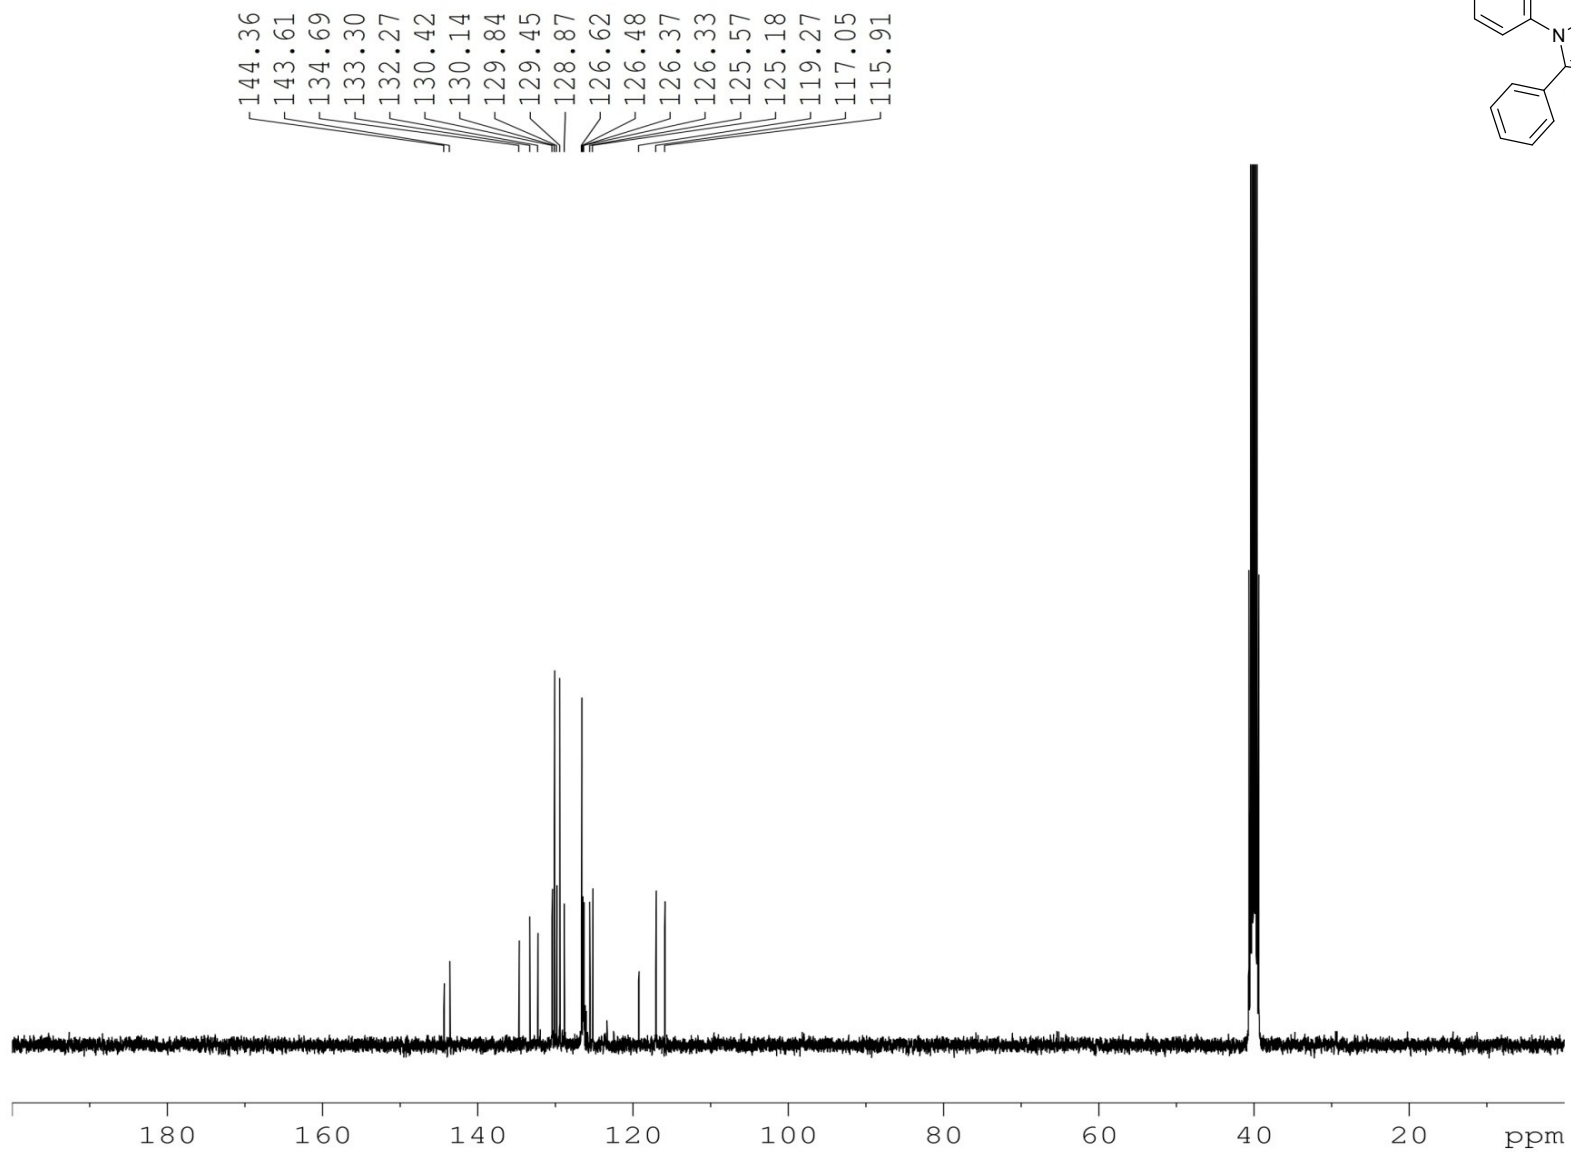

<sup>1</sup>H NMR of 4m

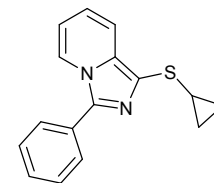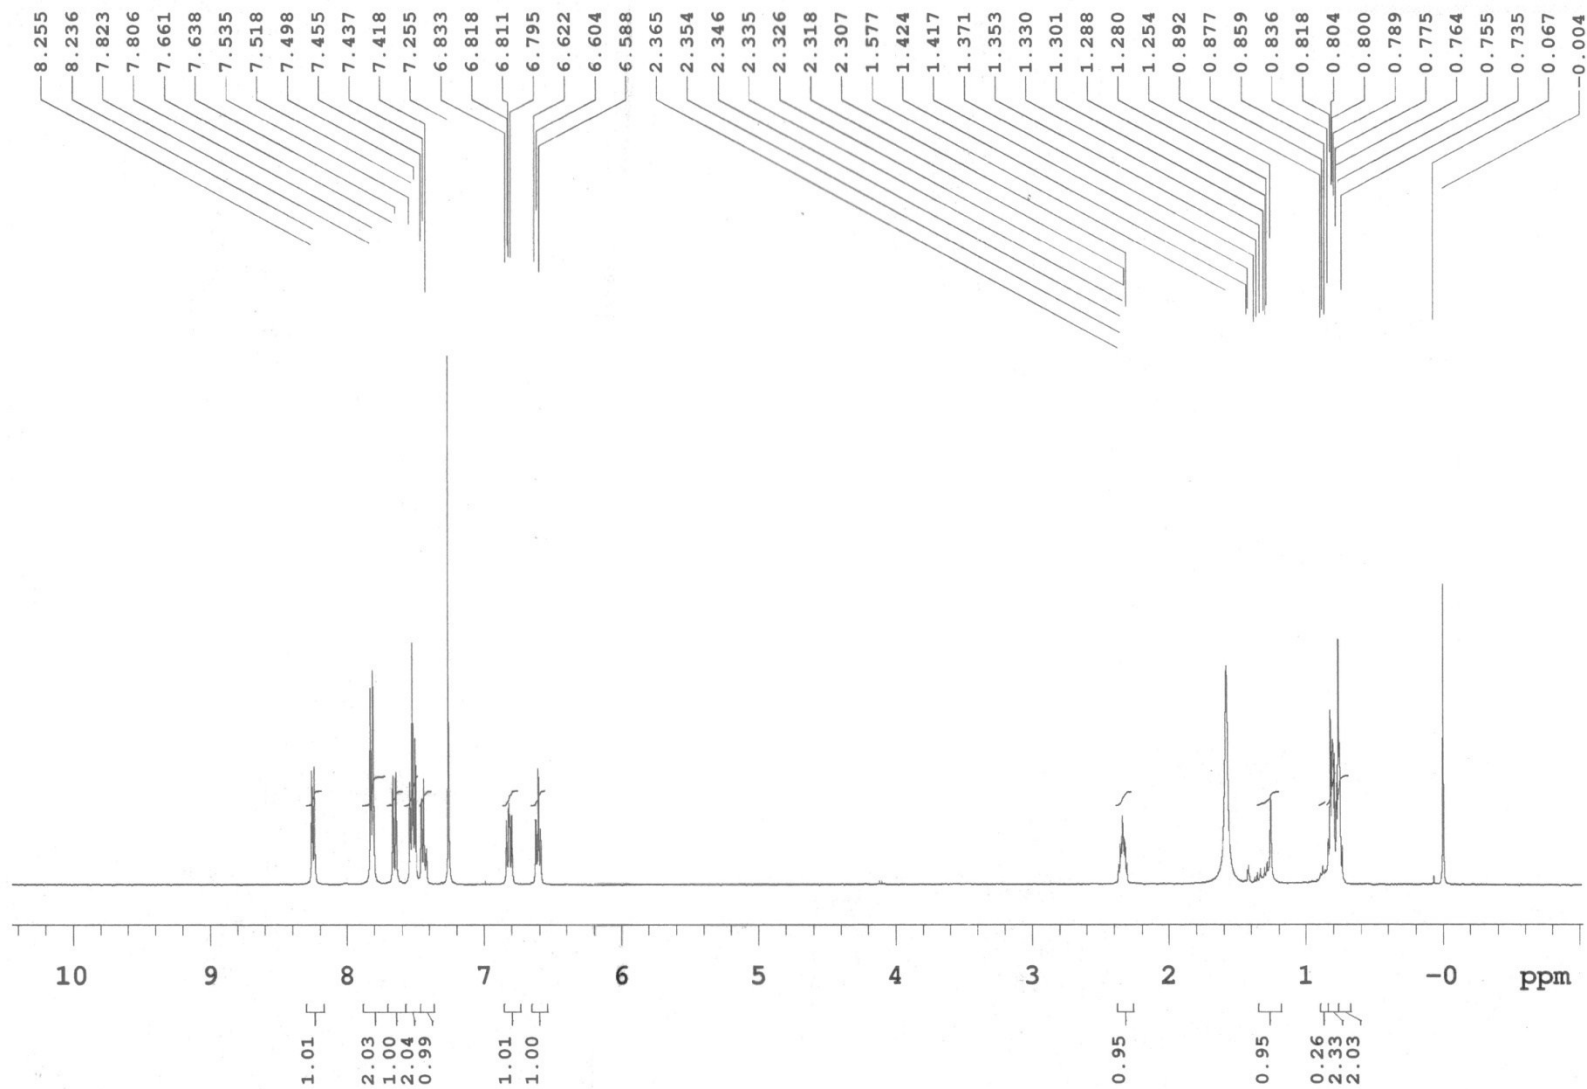

<sup>13</sup>C NMR of 4m

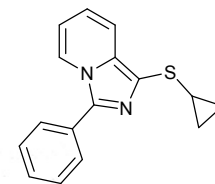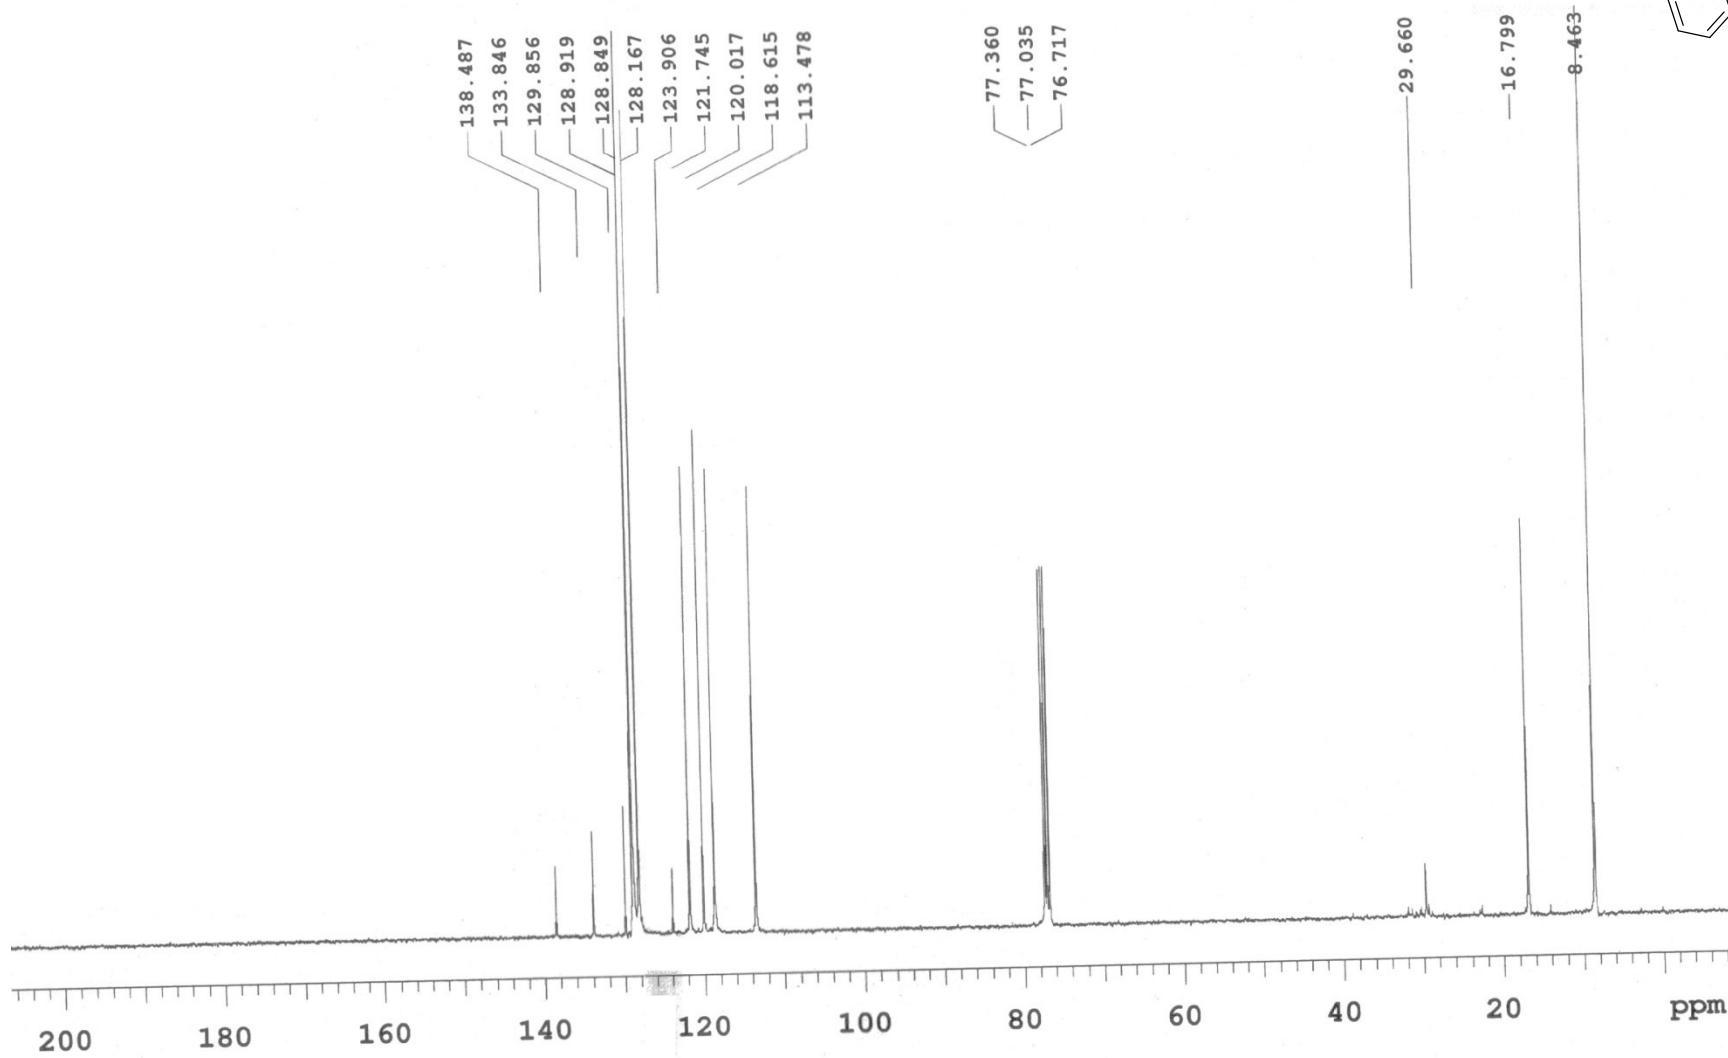

<sup>1</sup>H NMR of 4n

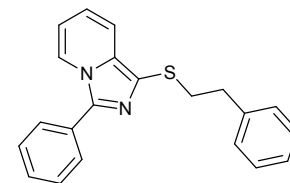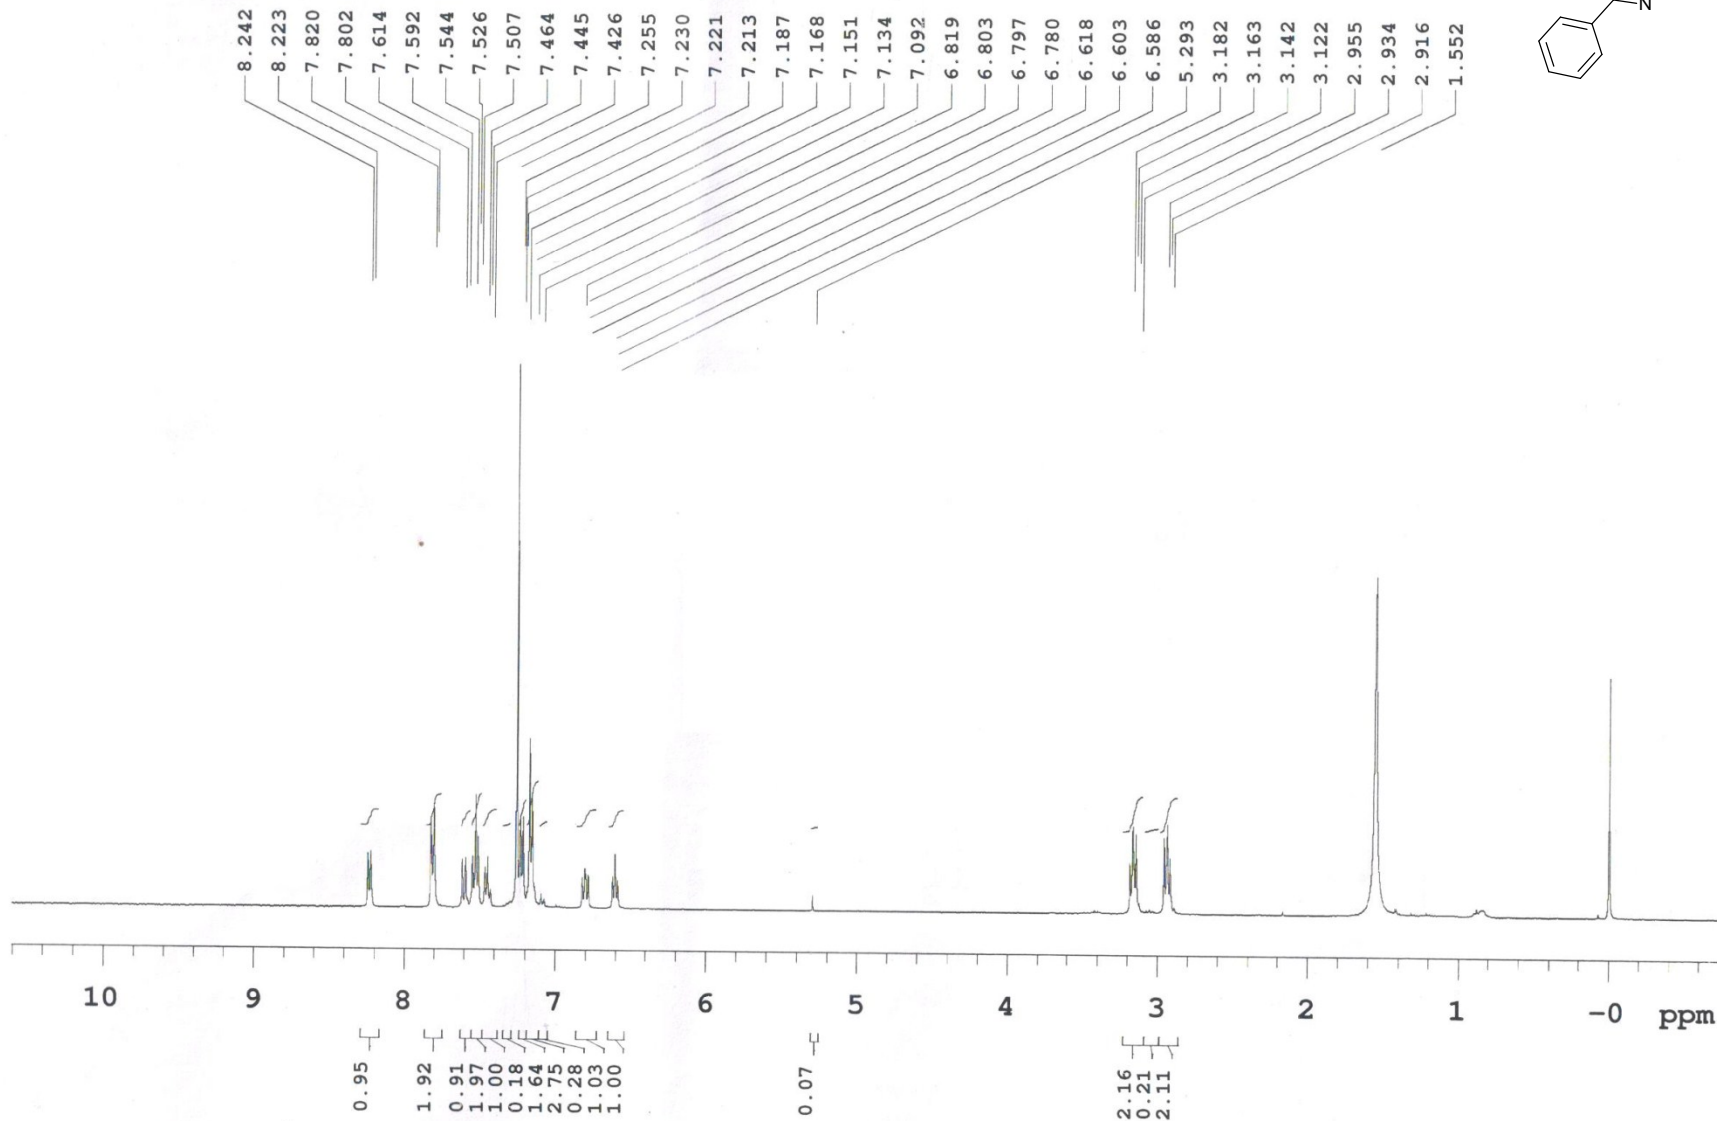

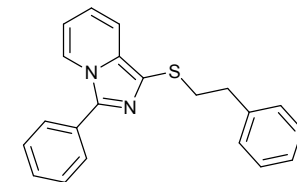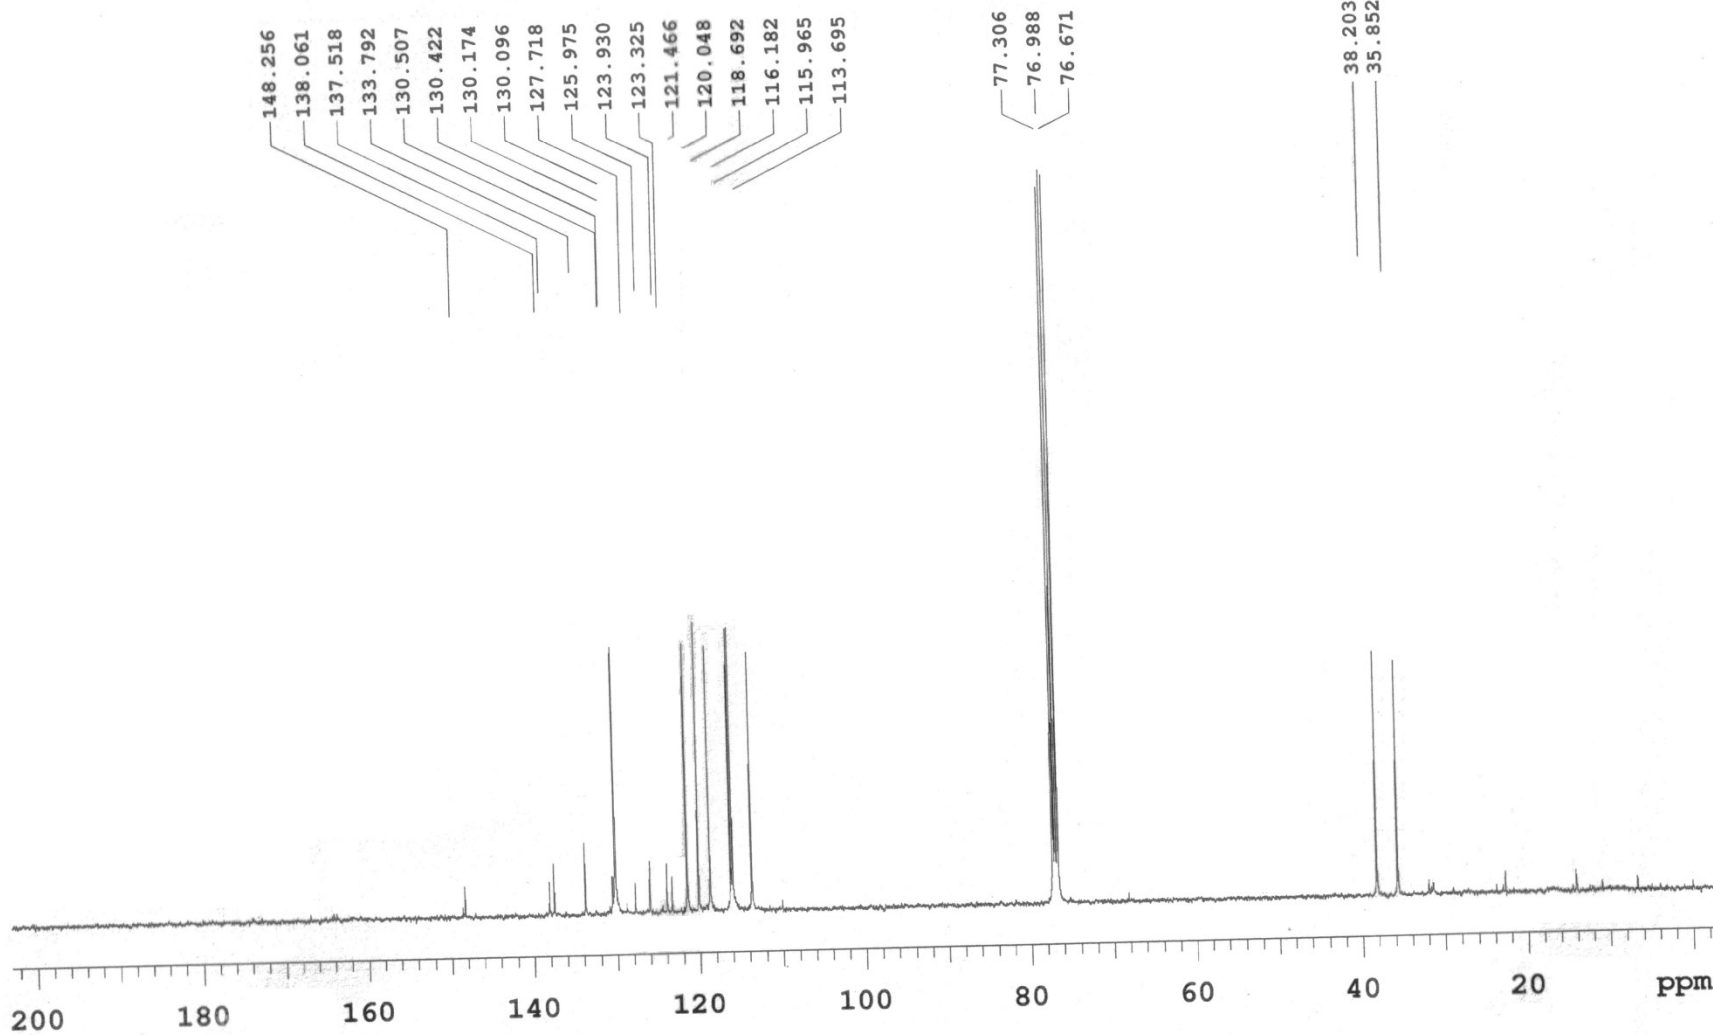



<sup>1</sup>H NMR of 5a

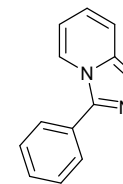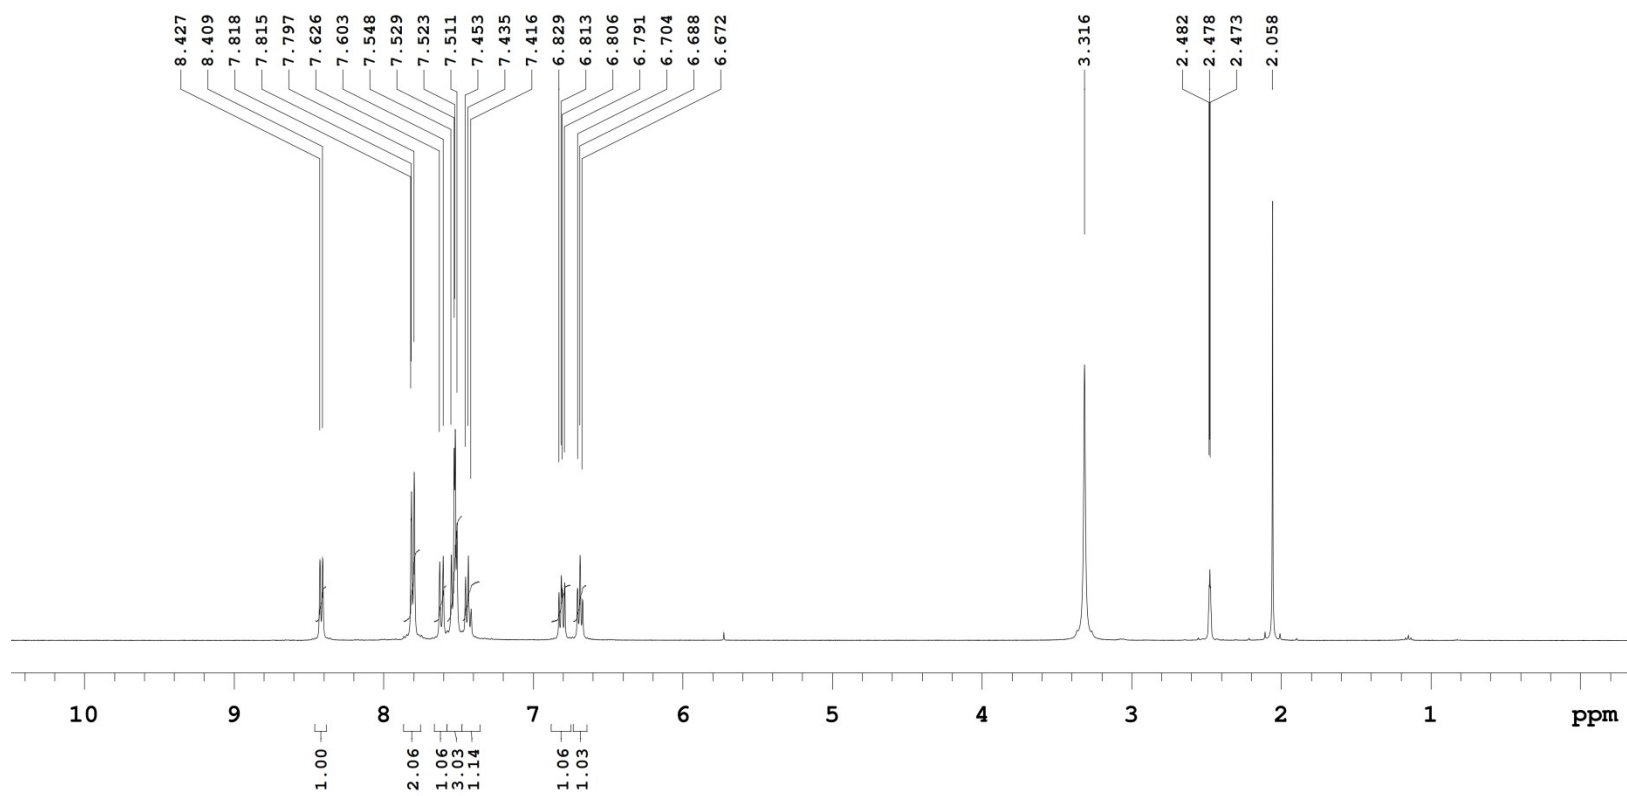

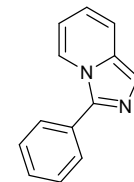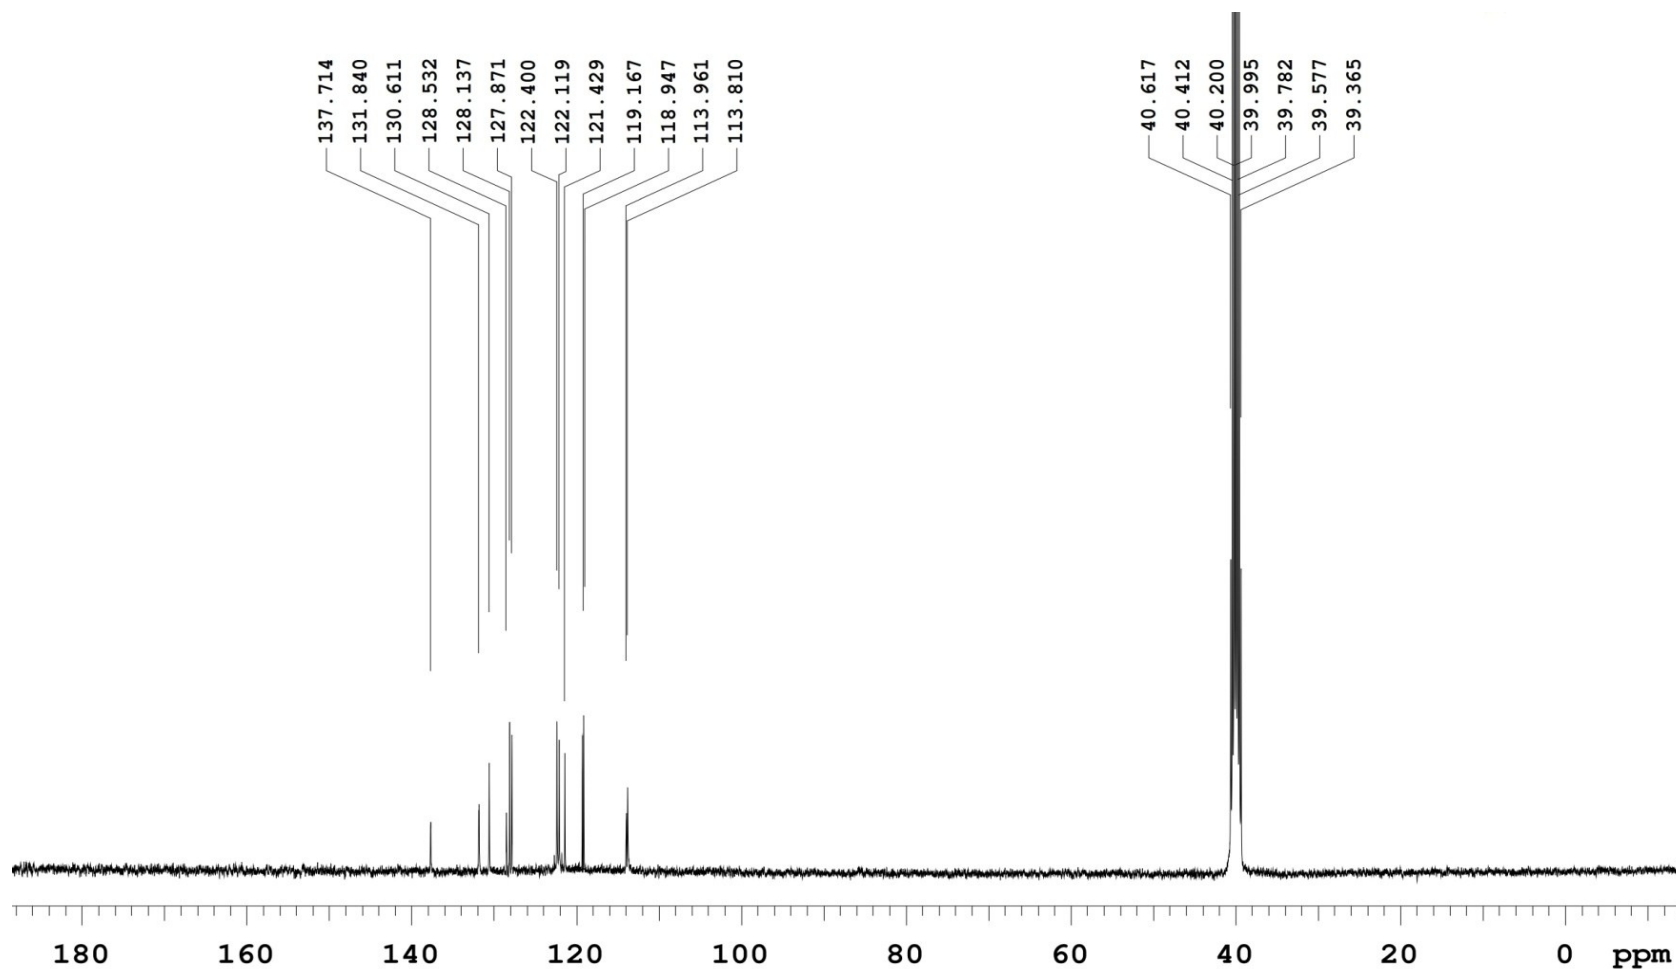

<sup>1</sup>H NMR of 5b

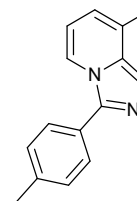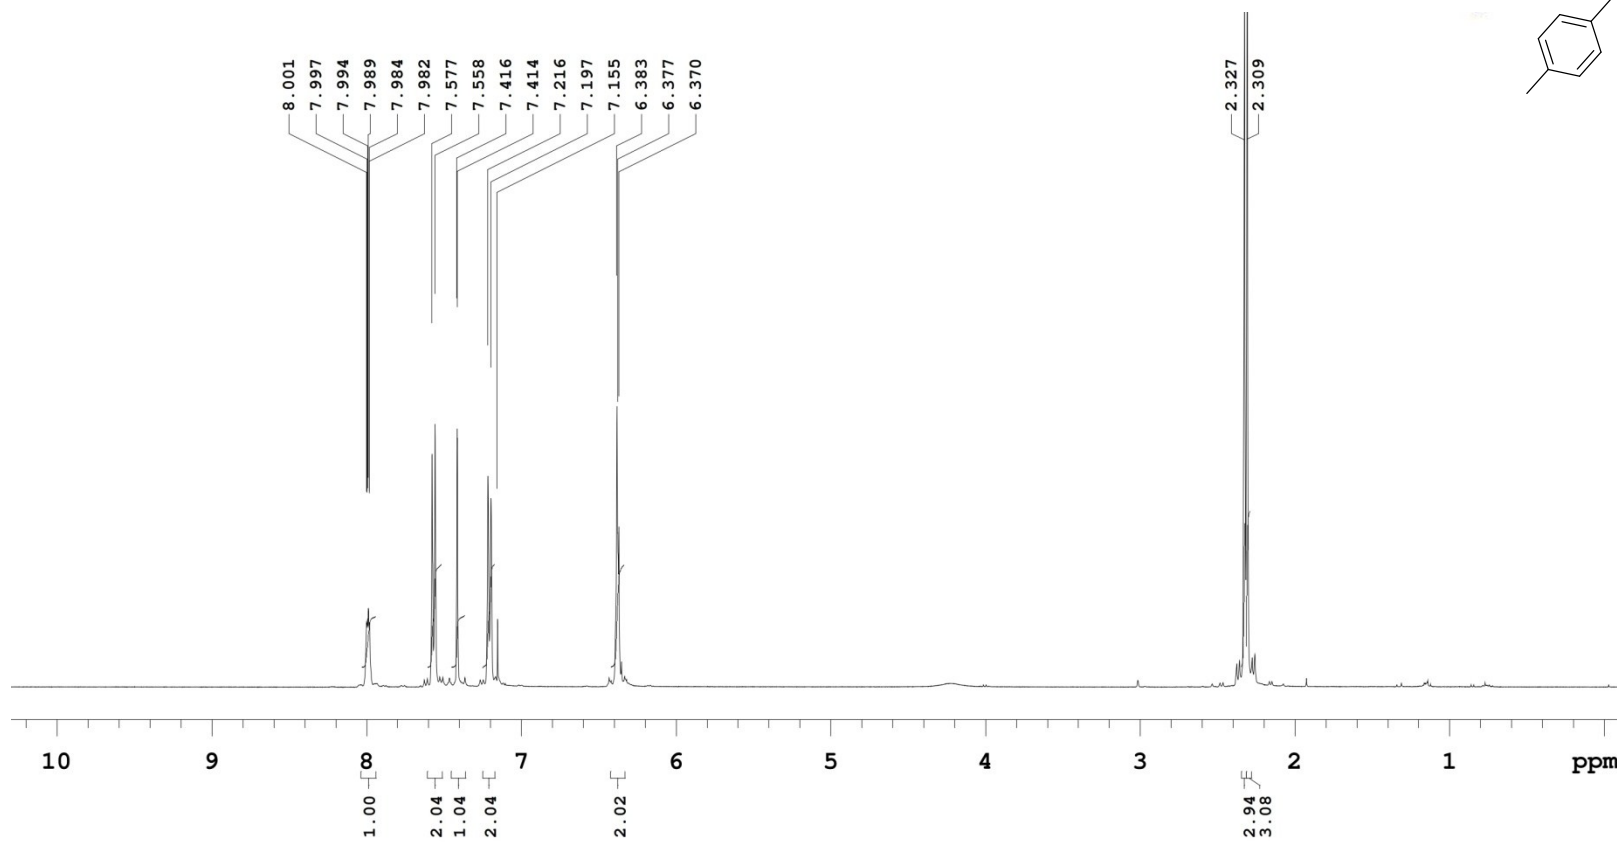

<sup>13</sup>C NMR of 5b

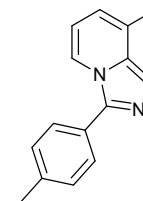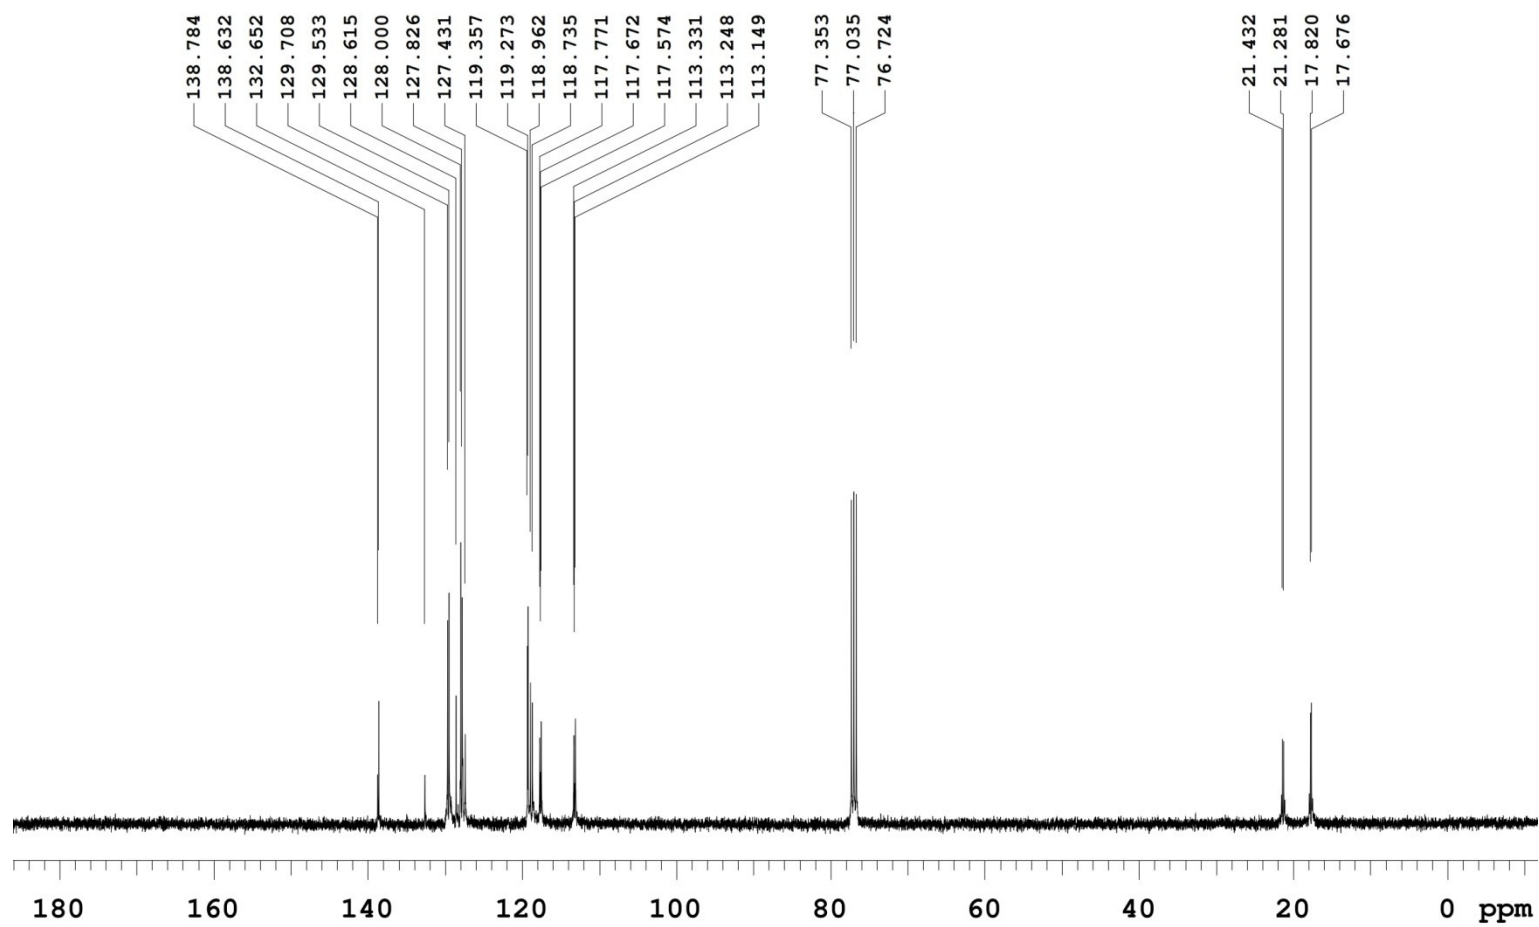

<sup>1</sup>H NMR of 5c

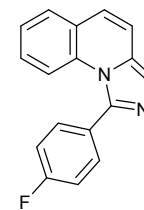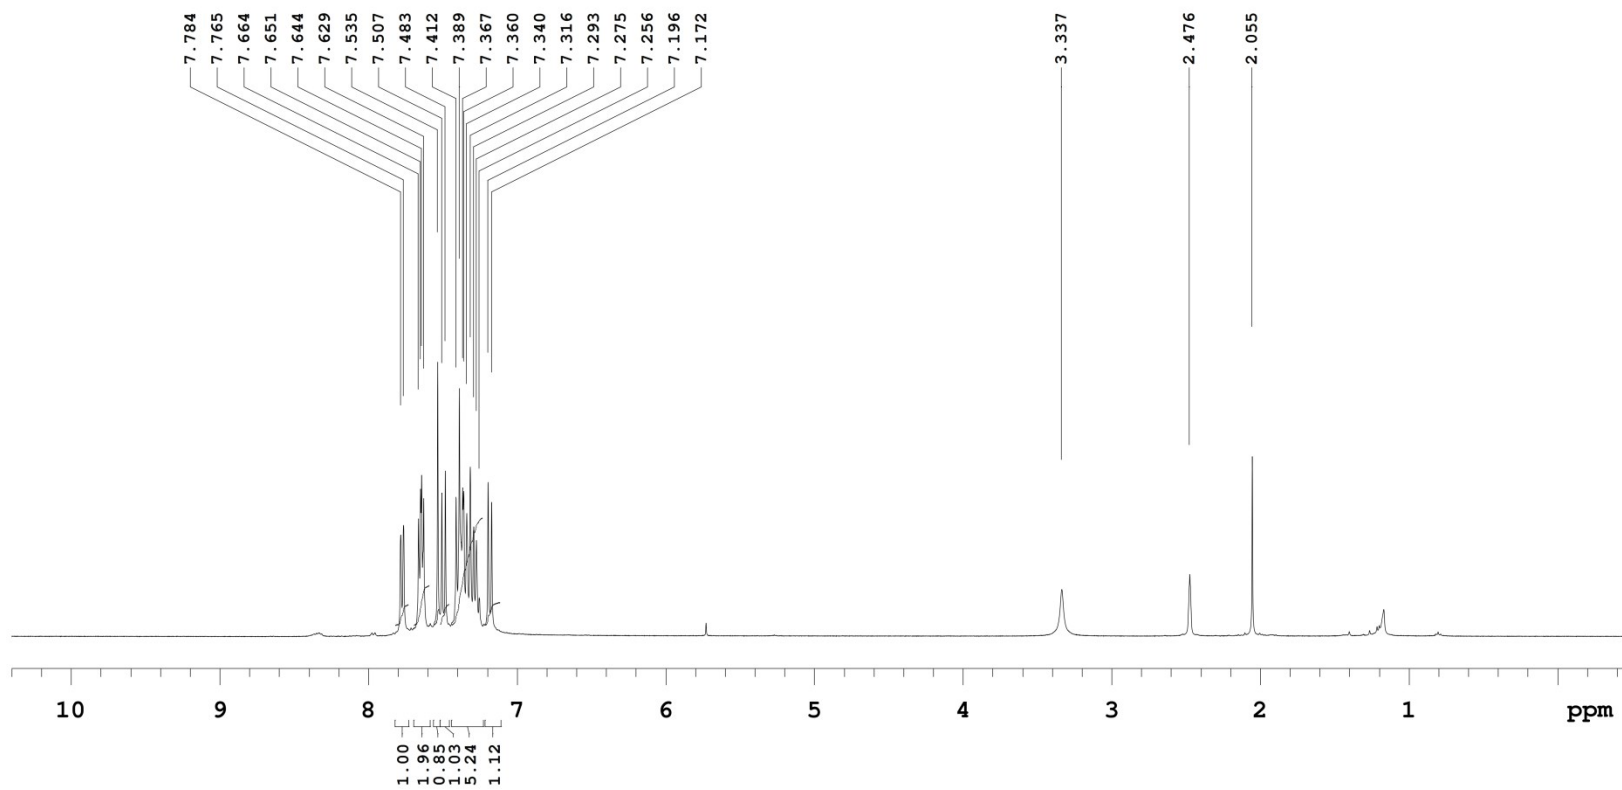

<sup>13</sup>C NMR of 5c

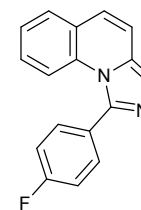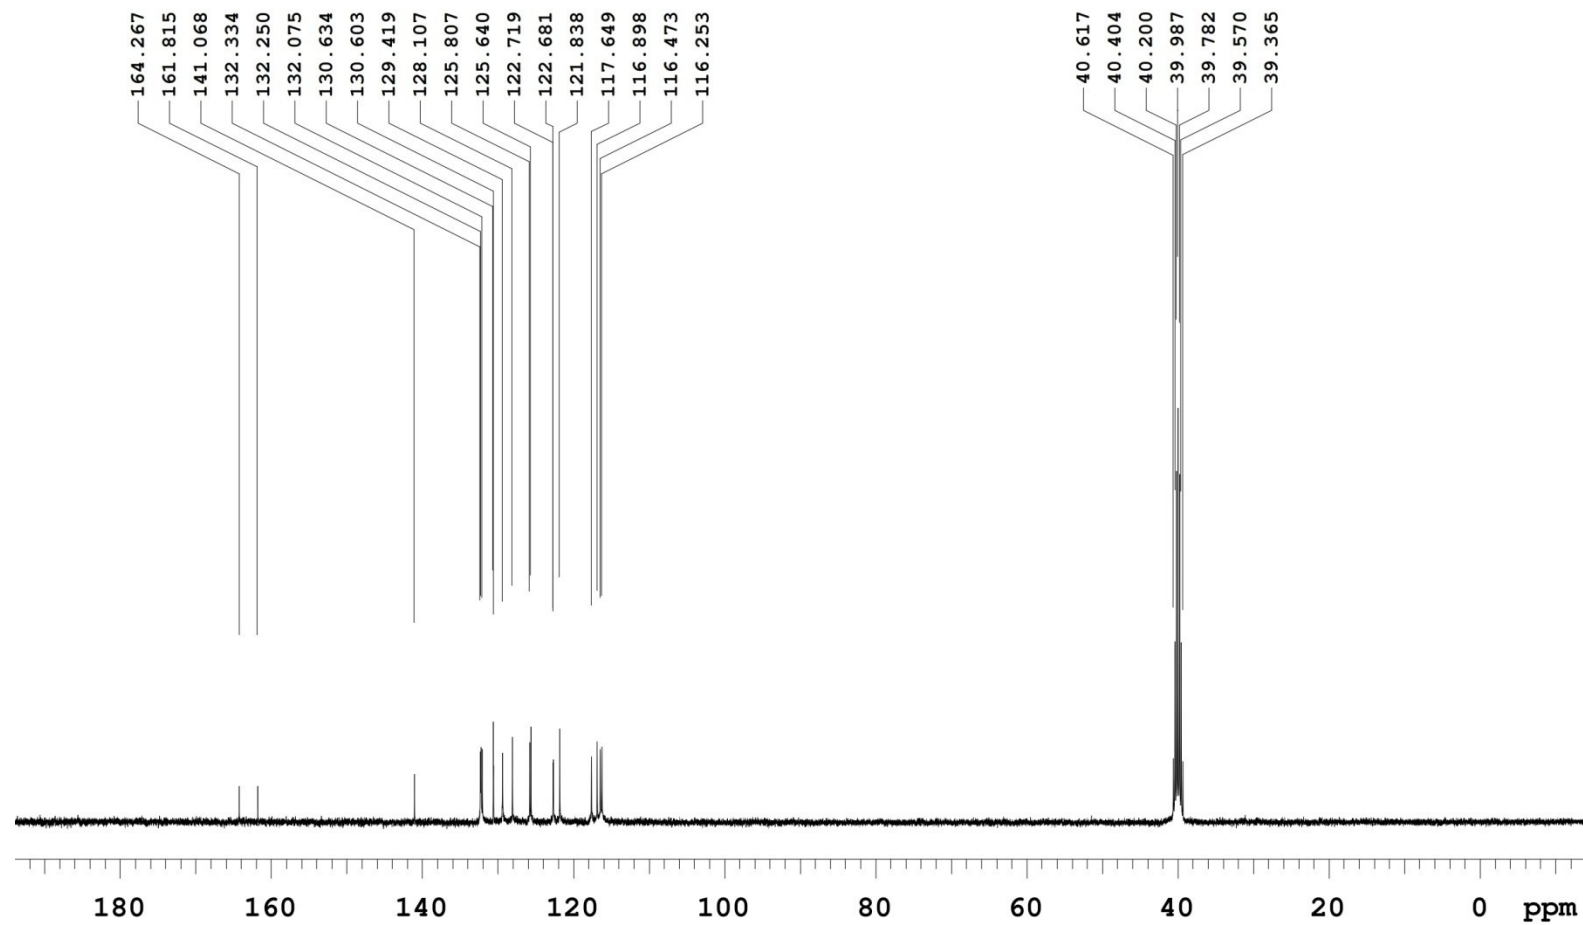

<sup>1</sup>H NMR of **5d**

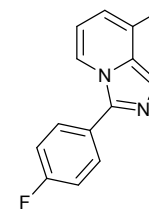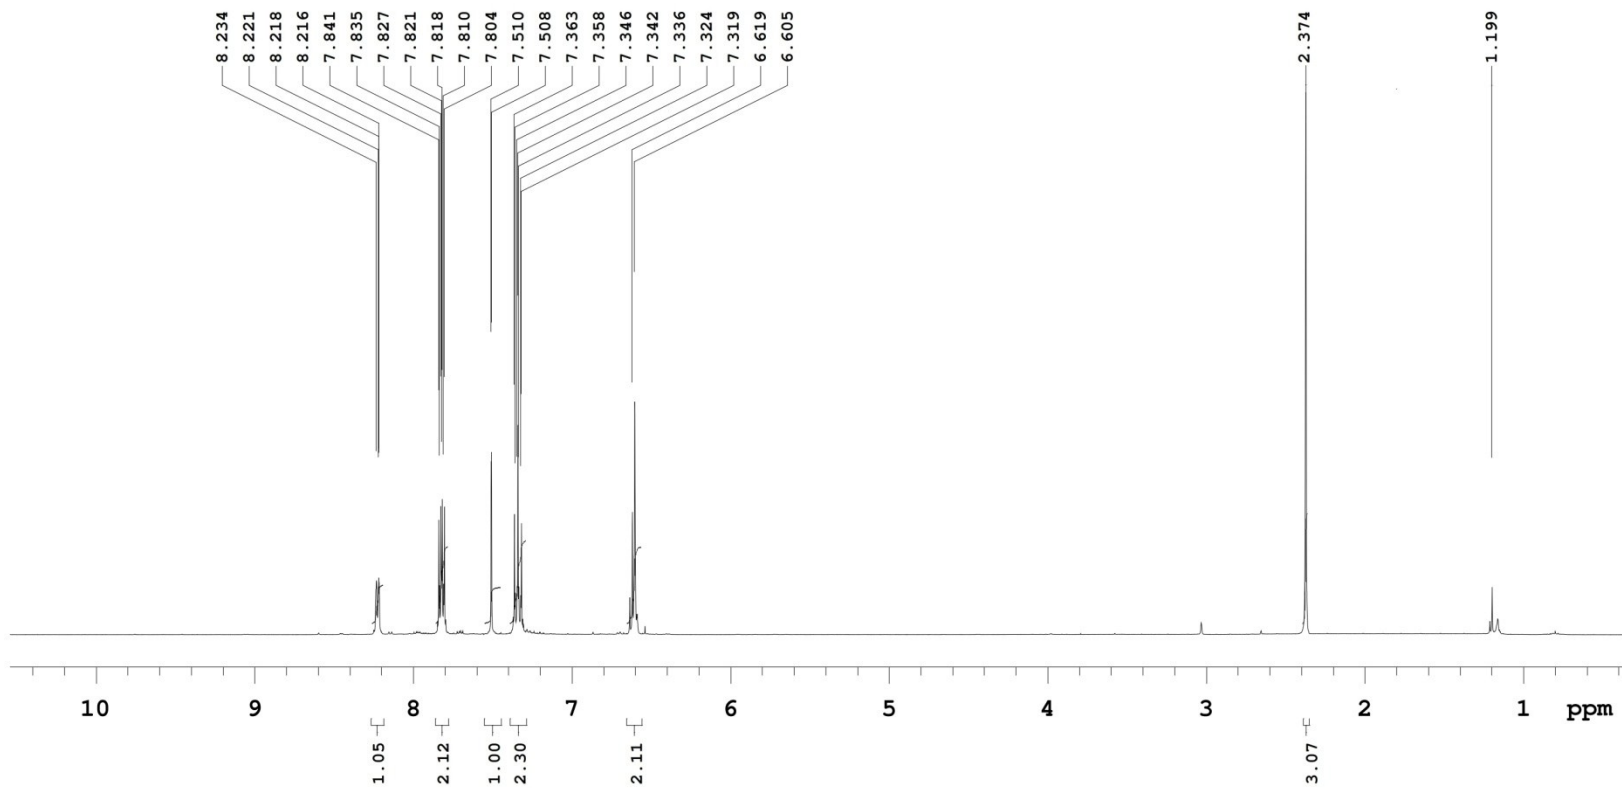

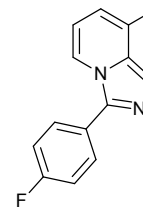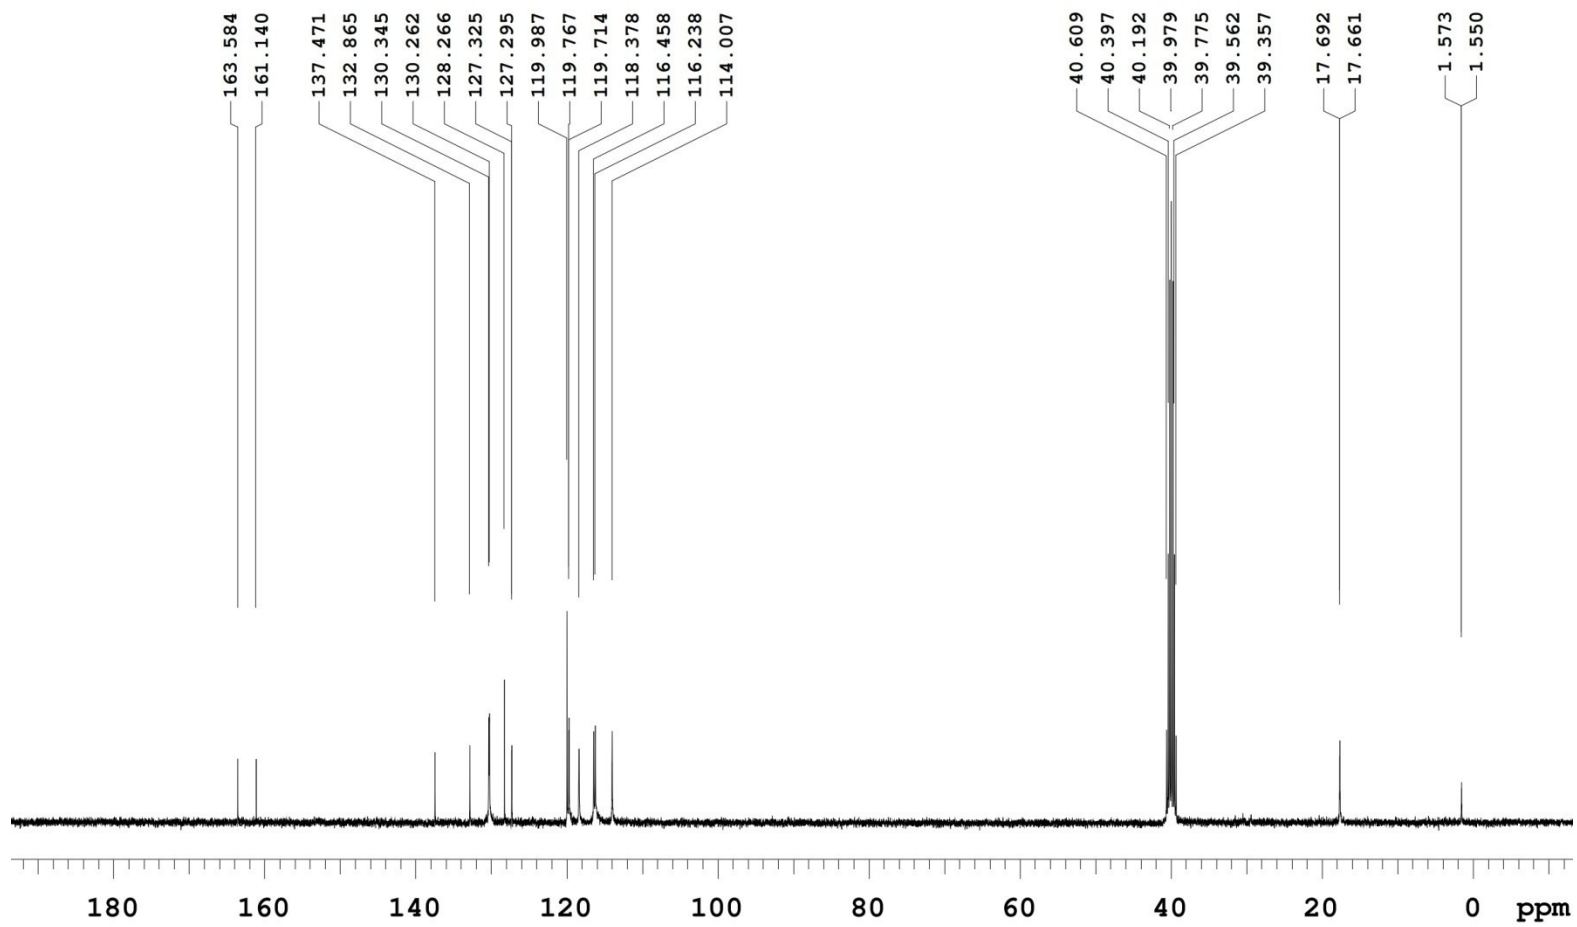



<sup>1</sup>H NMR of 5e

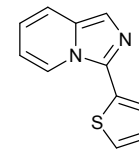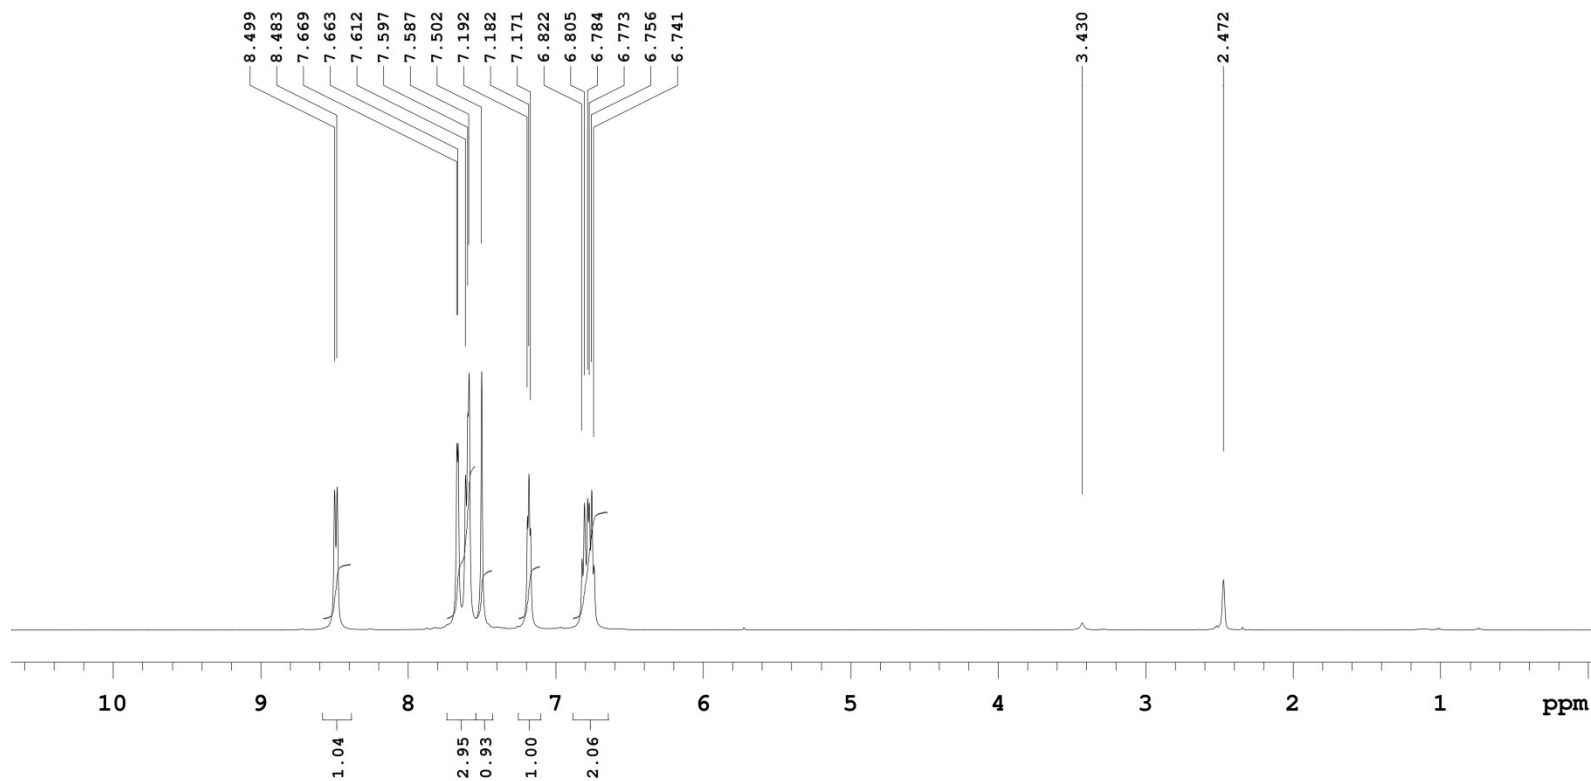

<sup>13</sup>C NMR of 5e

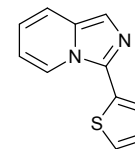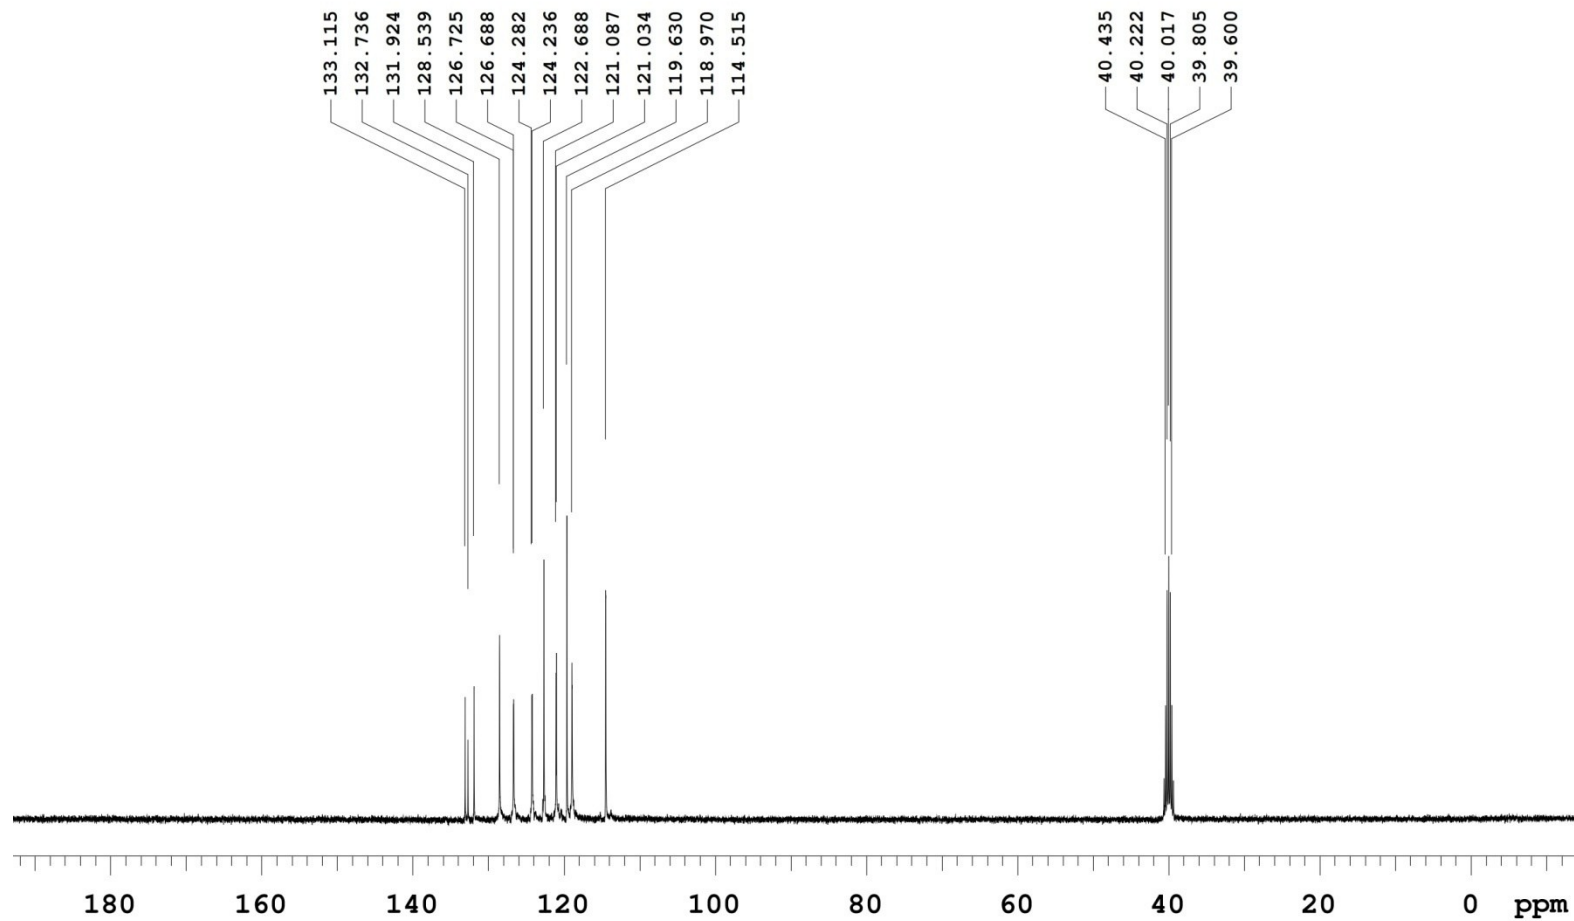

<sup>1</sup>H NMR of 5f

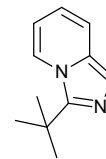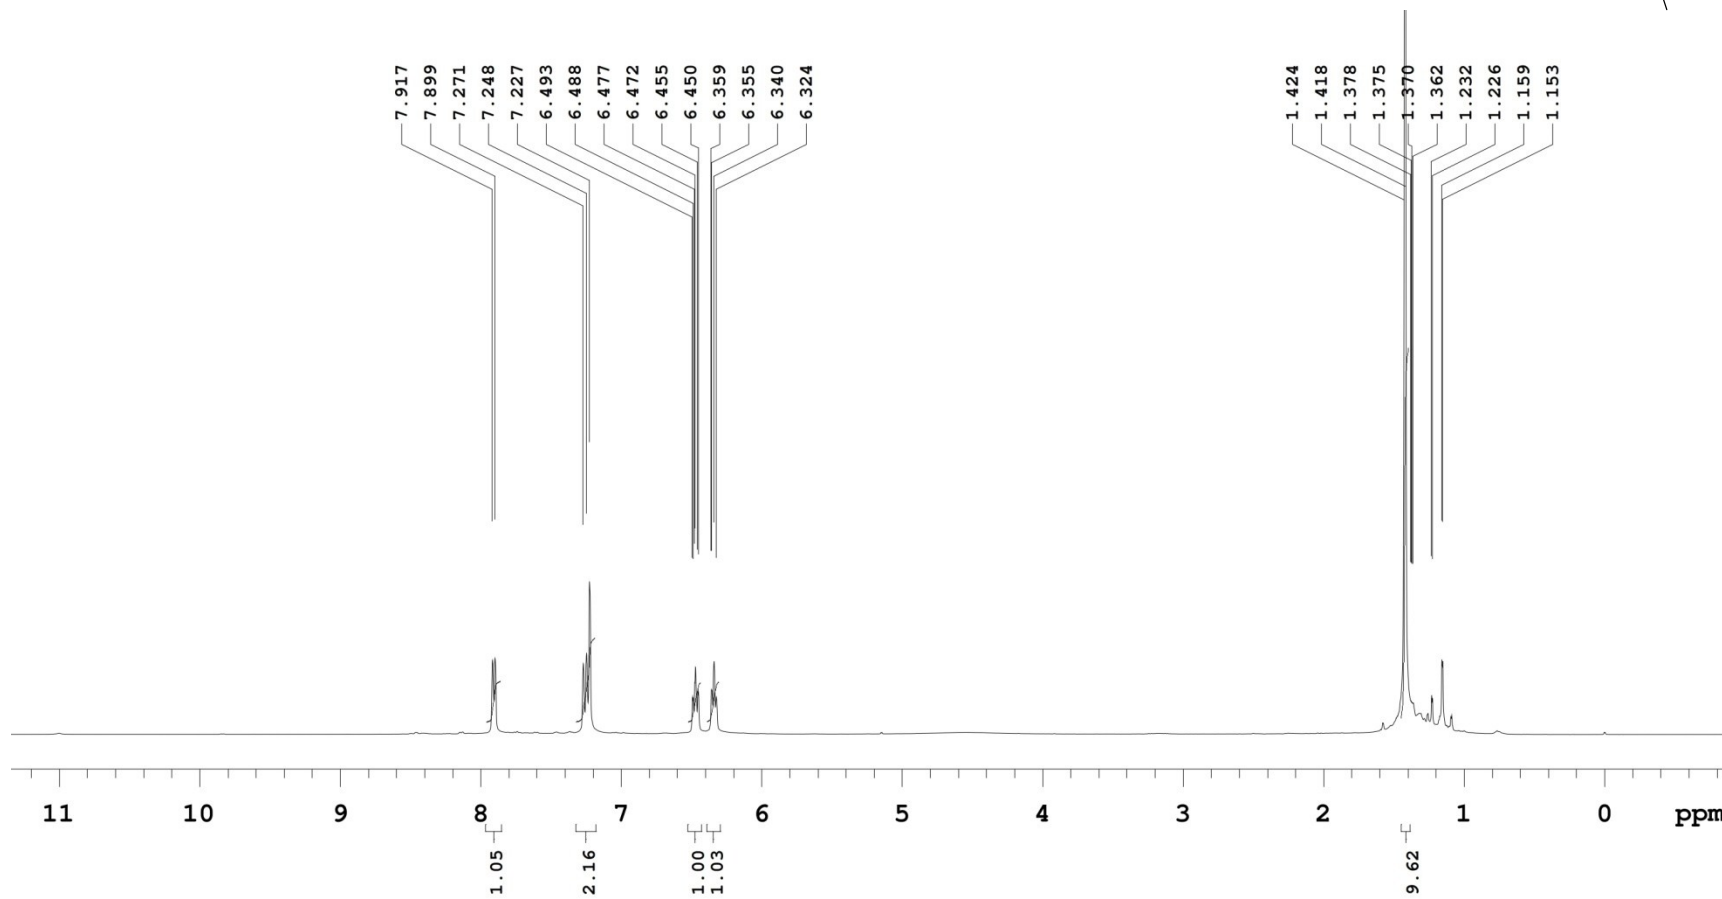

<sup>13</sup>C NMR of 5f

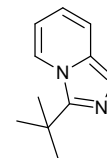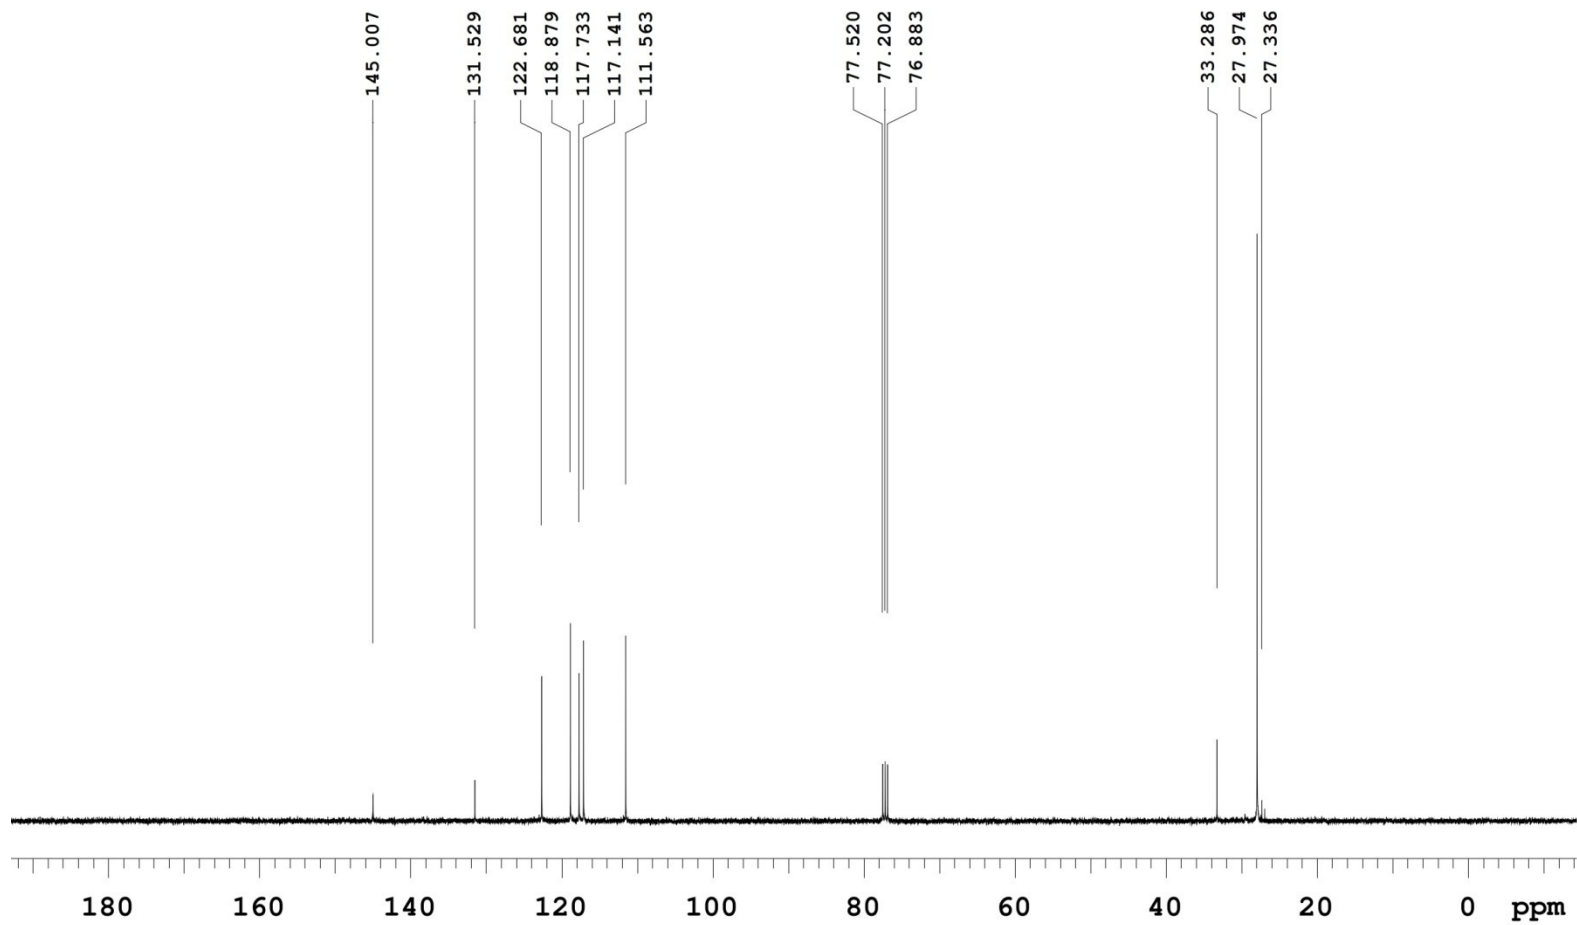

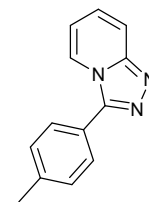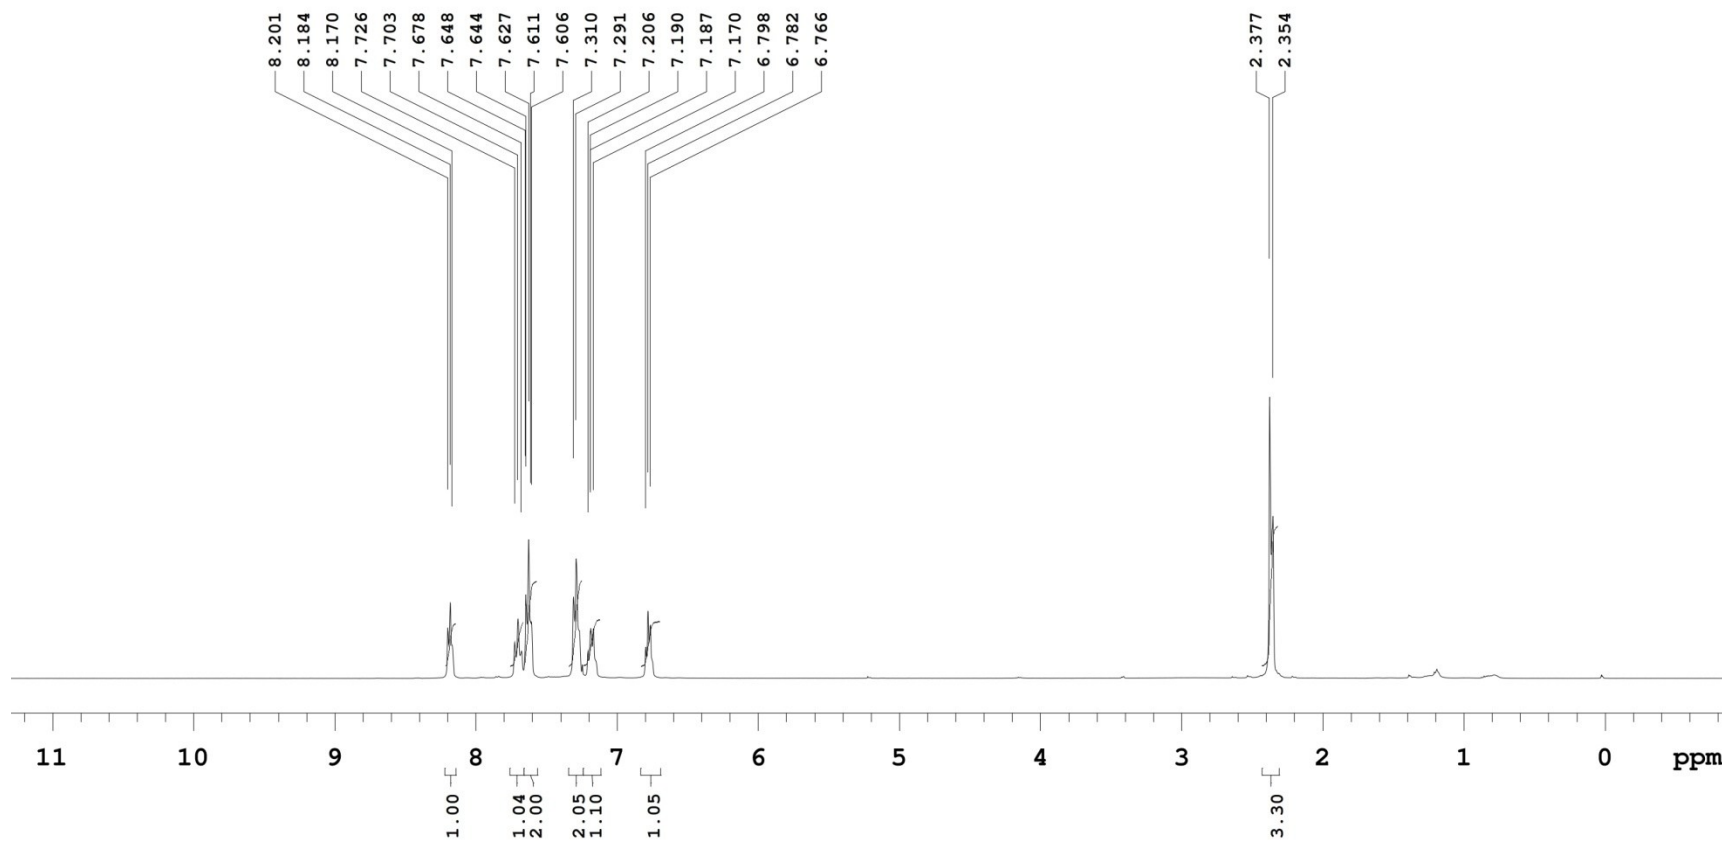

<sup>13</sup>C NMR of 5g

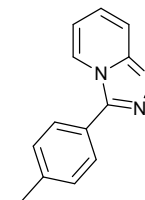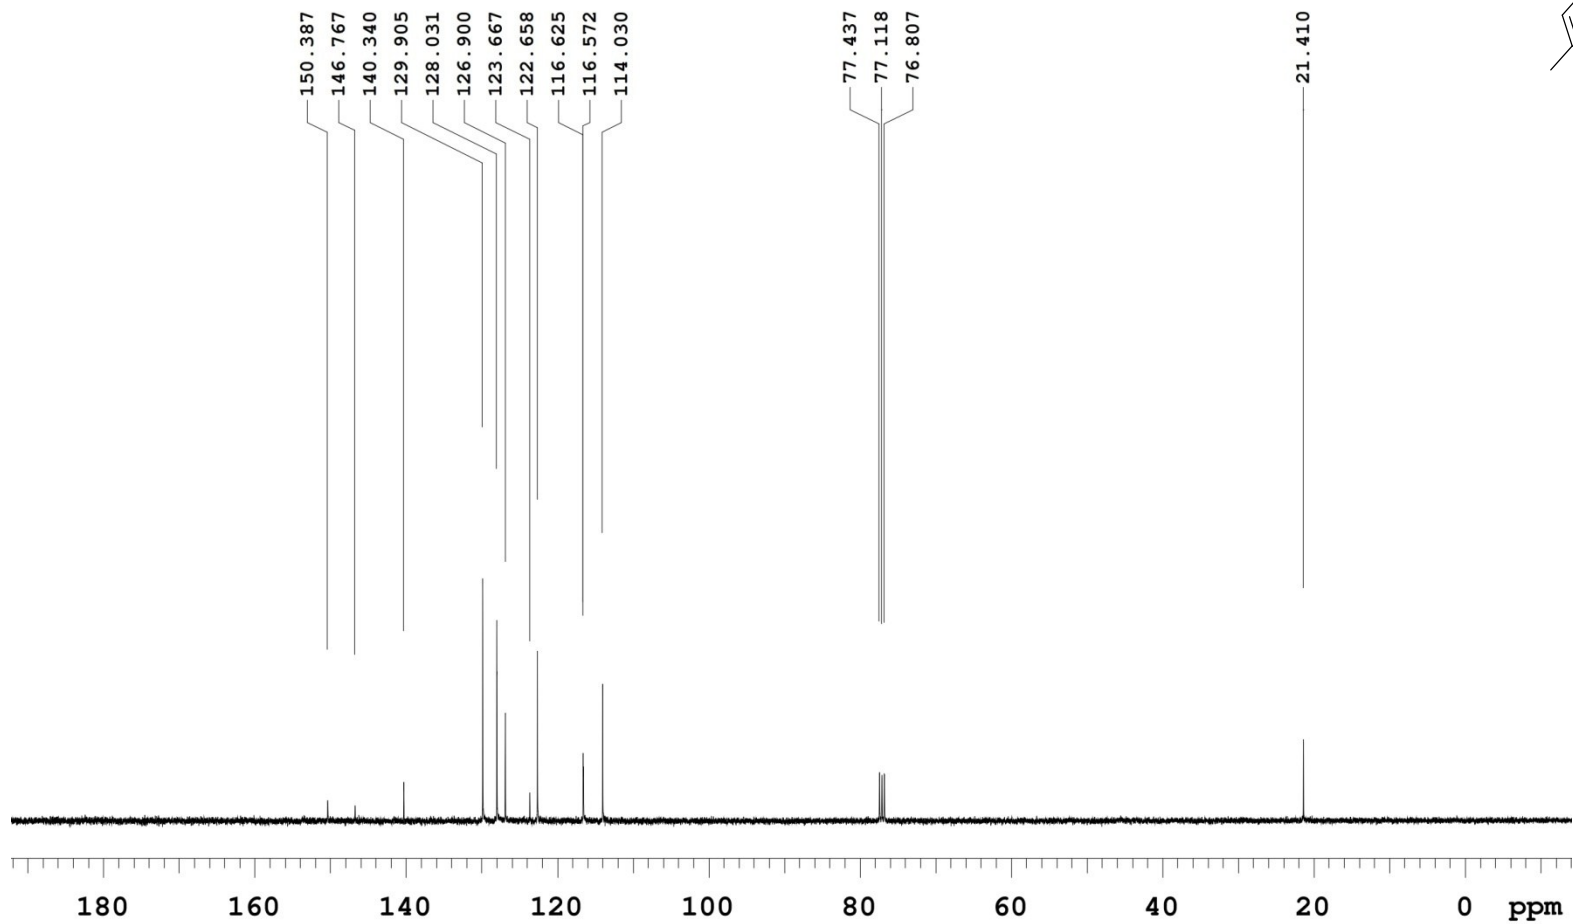

<sup>1</sup>H NMR of **5h**

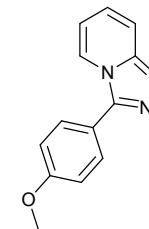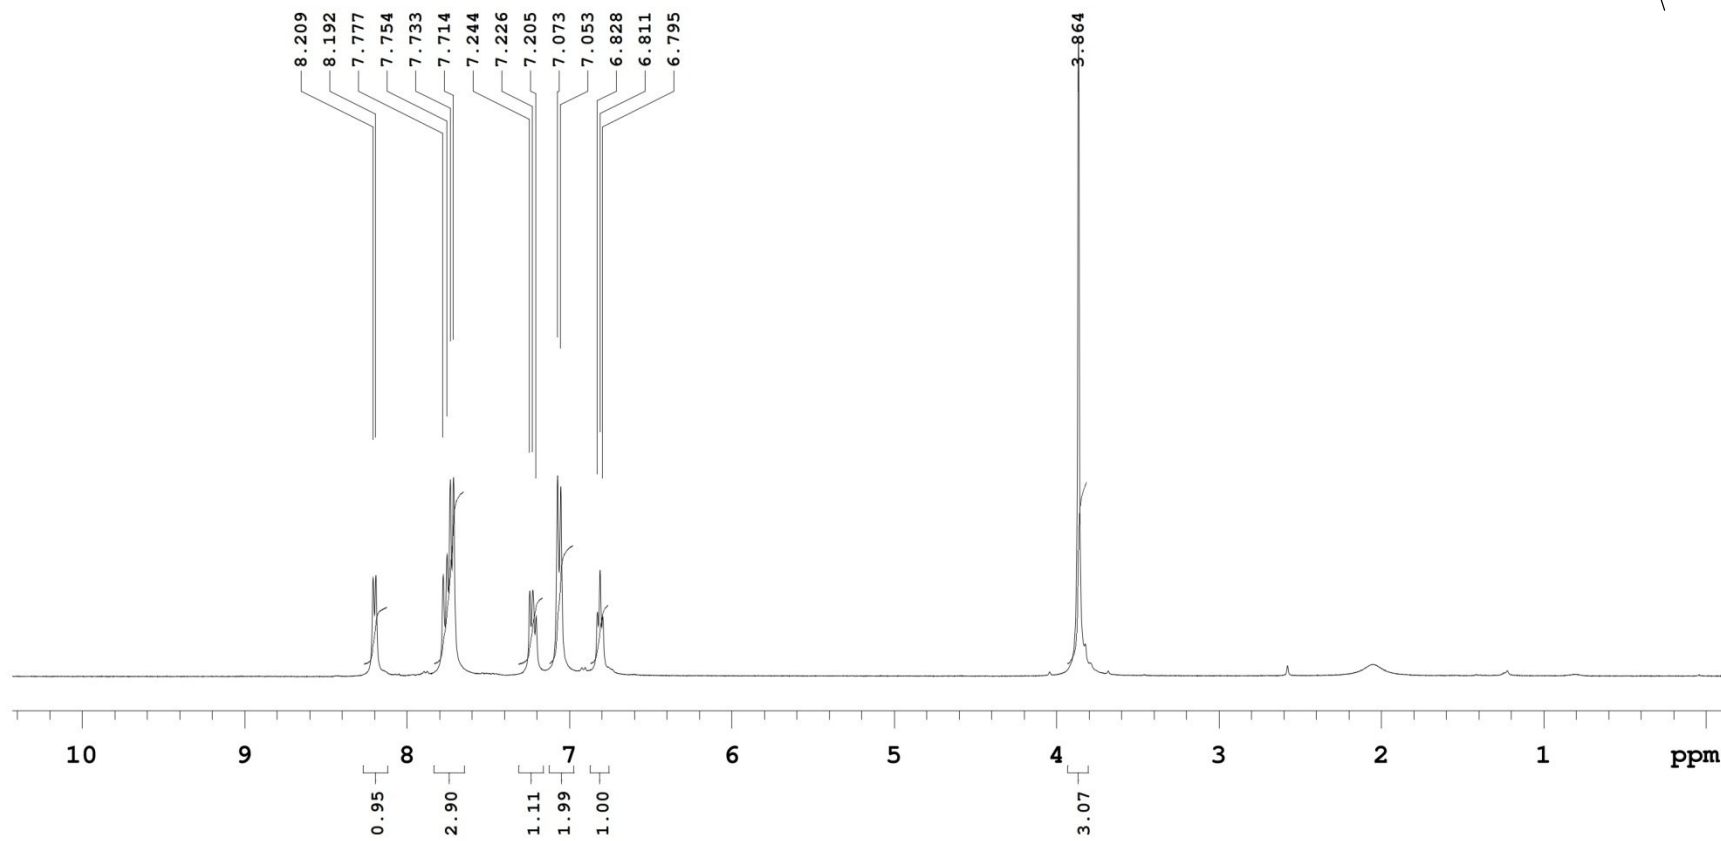

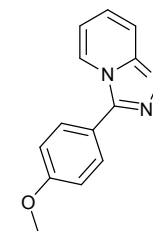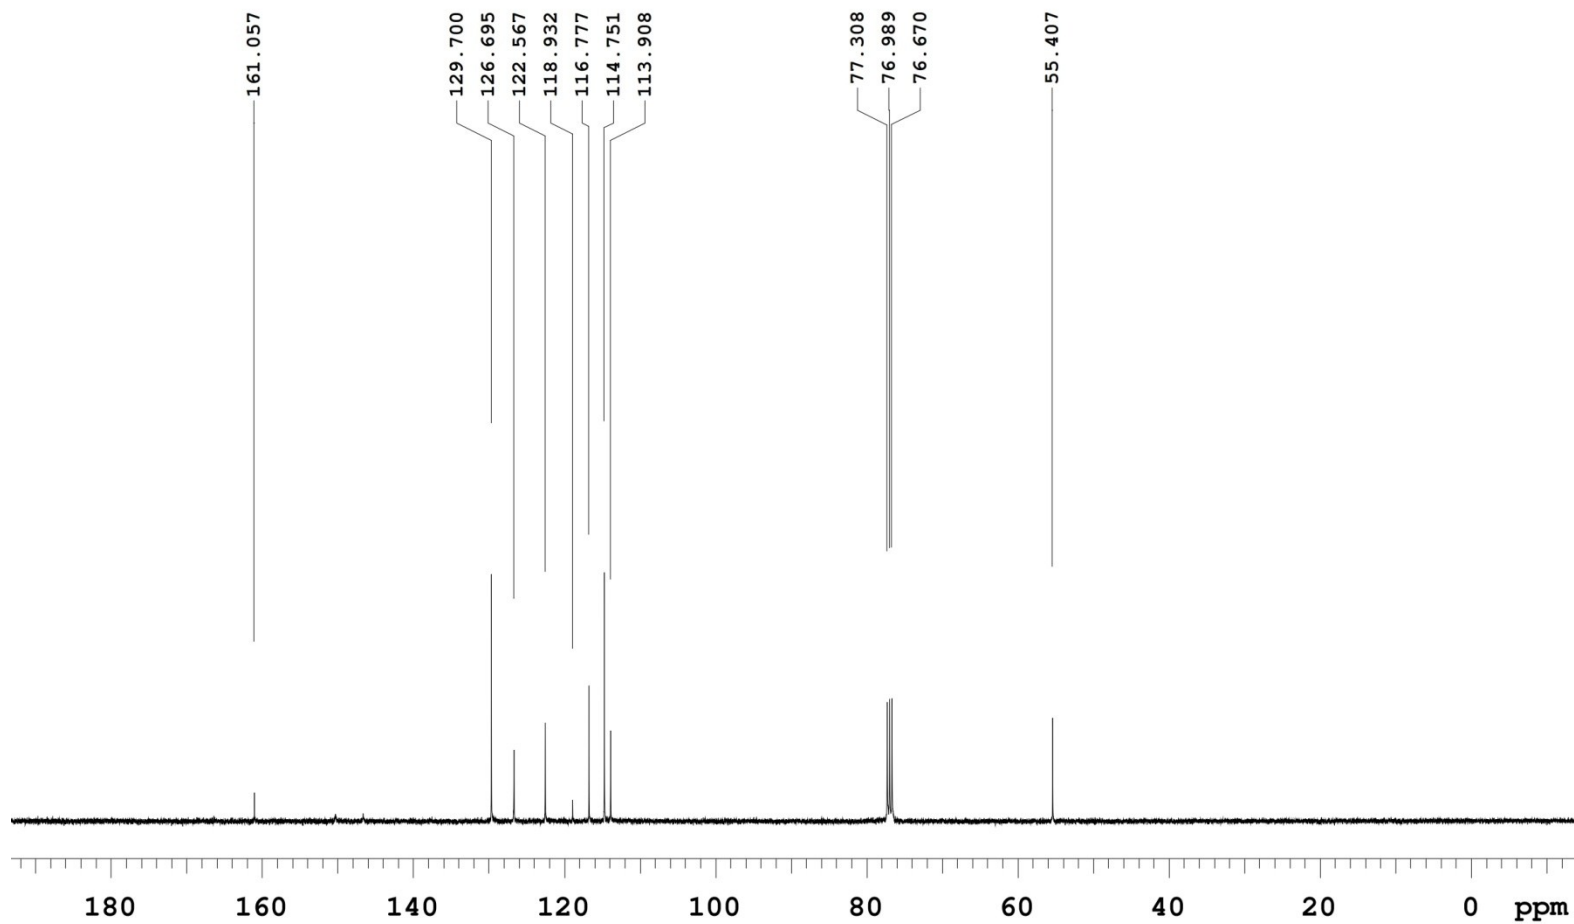



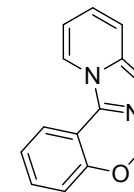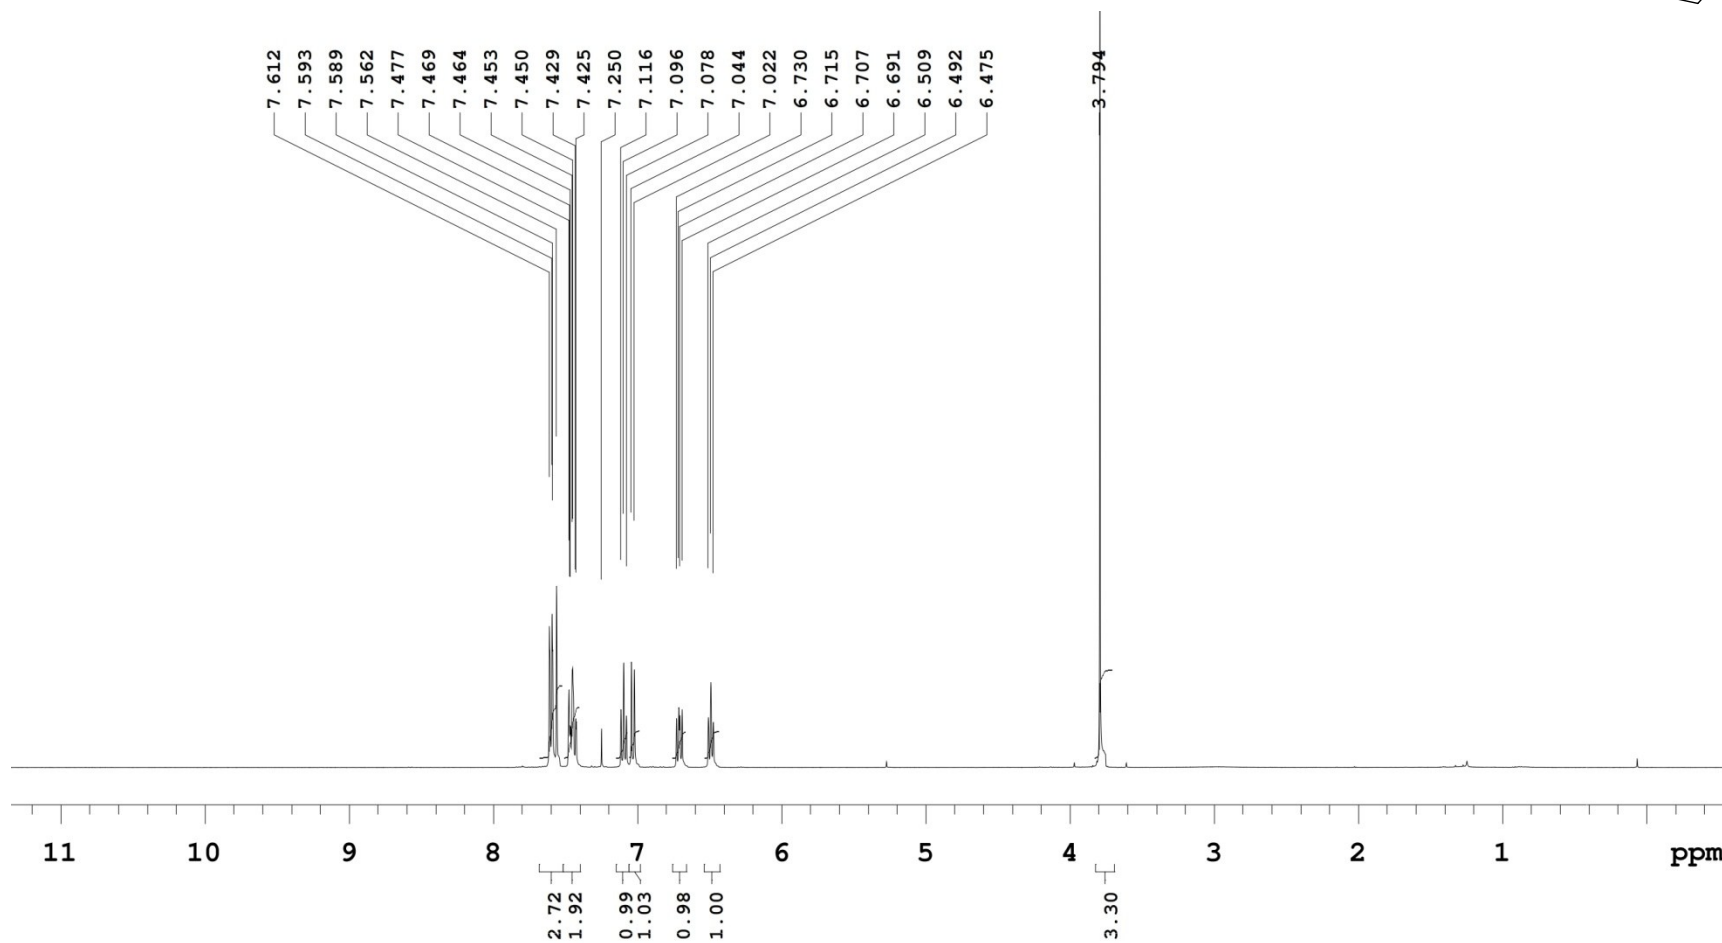

<sup>13</sup>C NMR of 5i

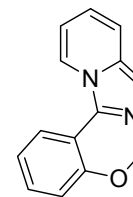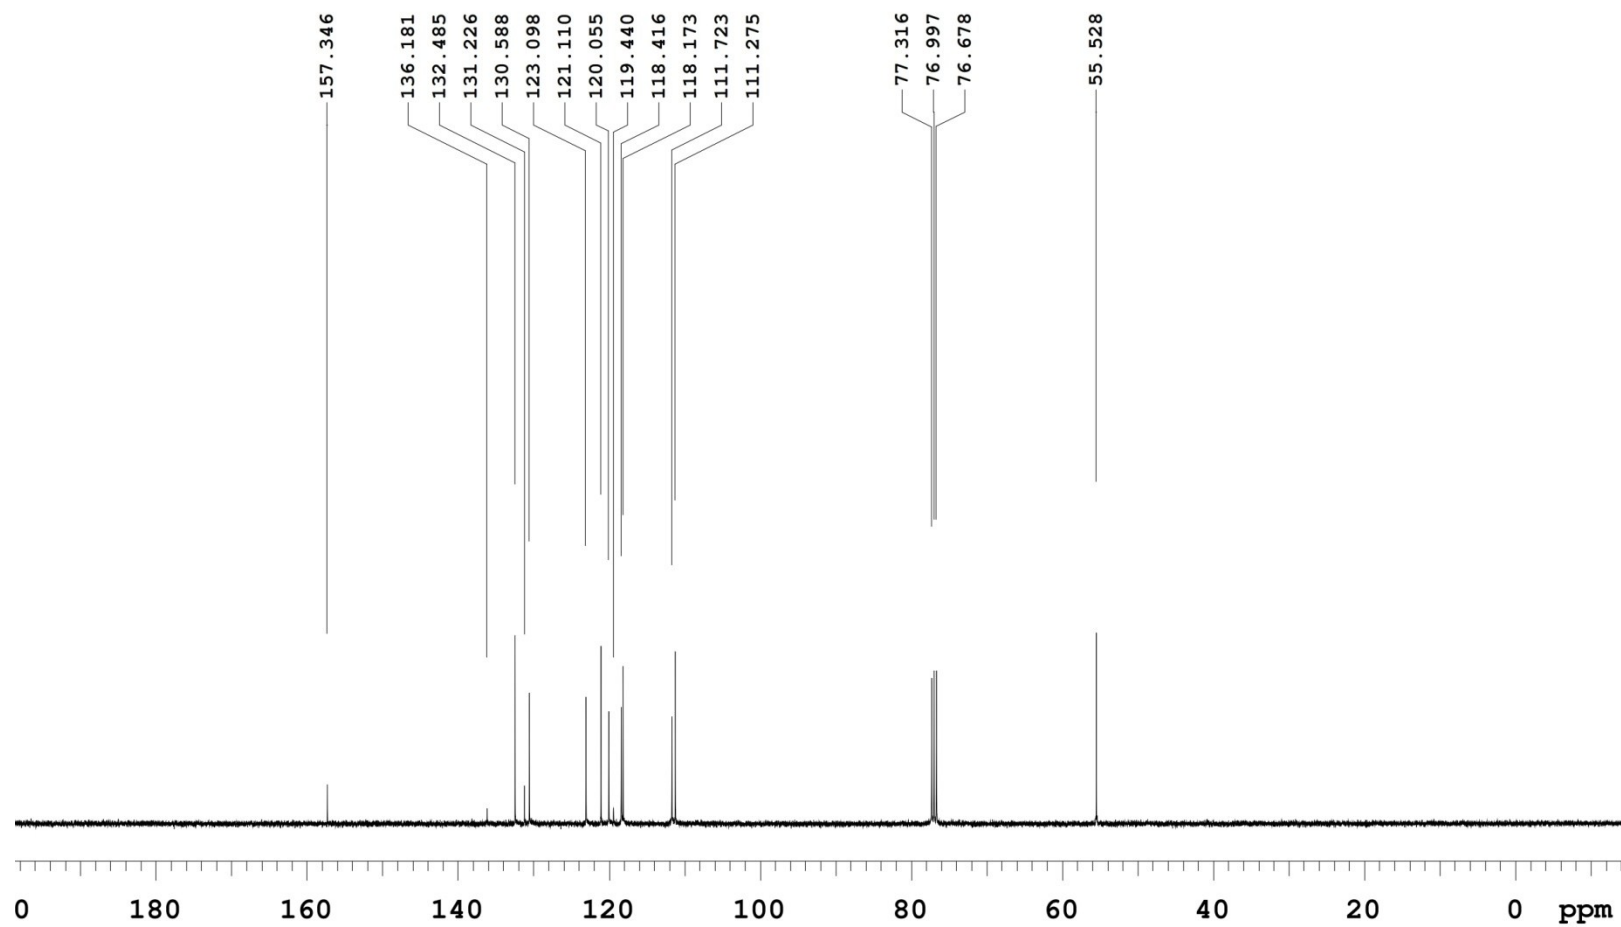

<sup>1</sup>H NMR of **5j**

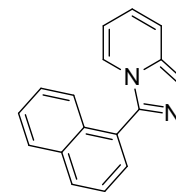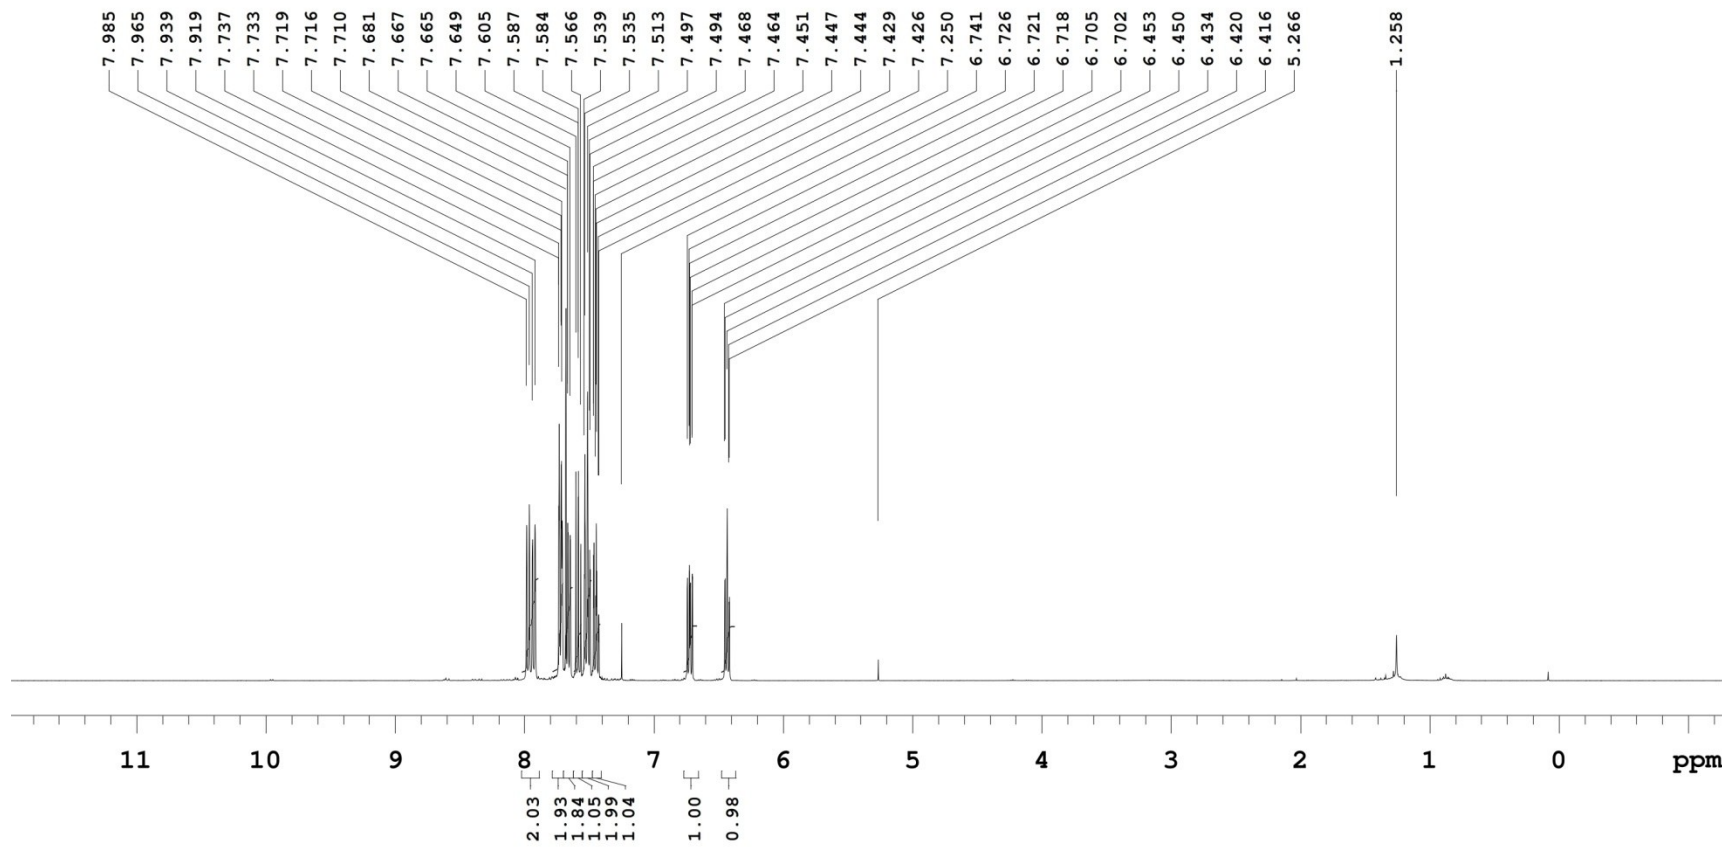

<sup>13</sup>C NMR of **5j**

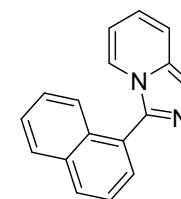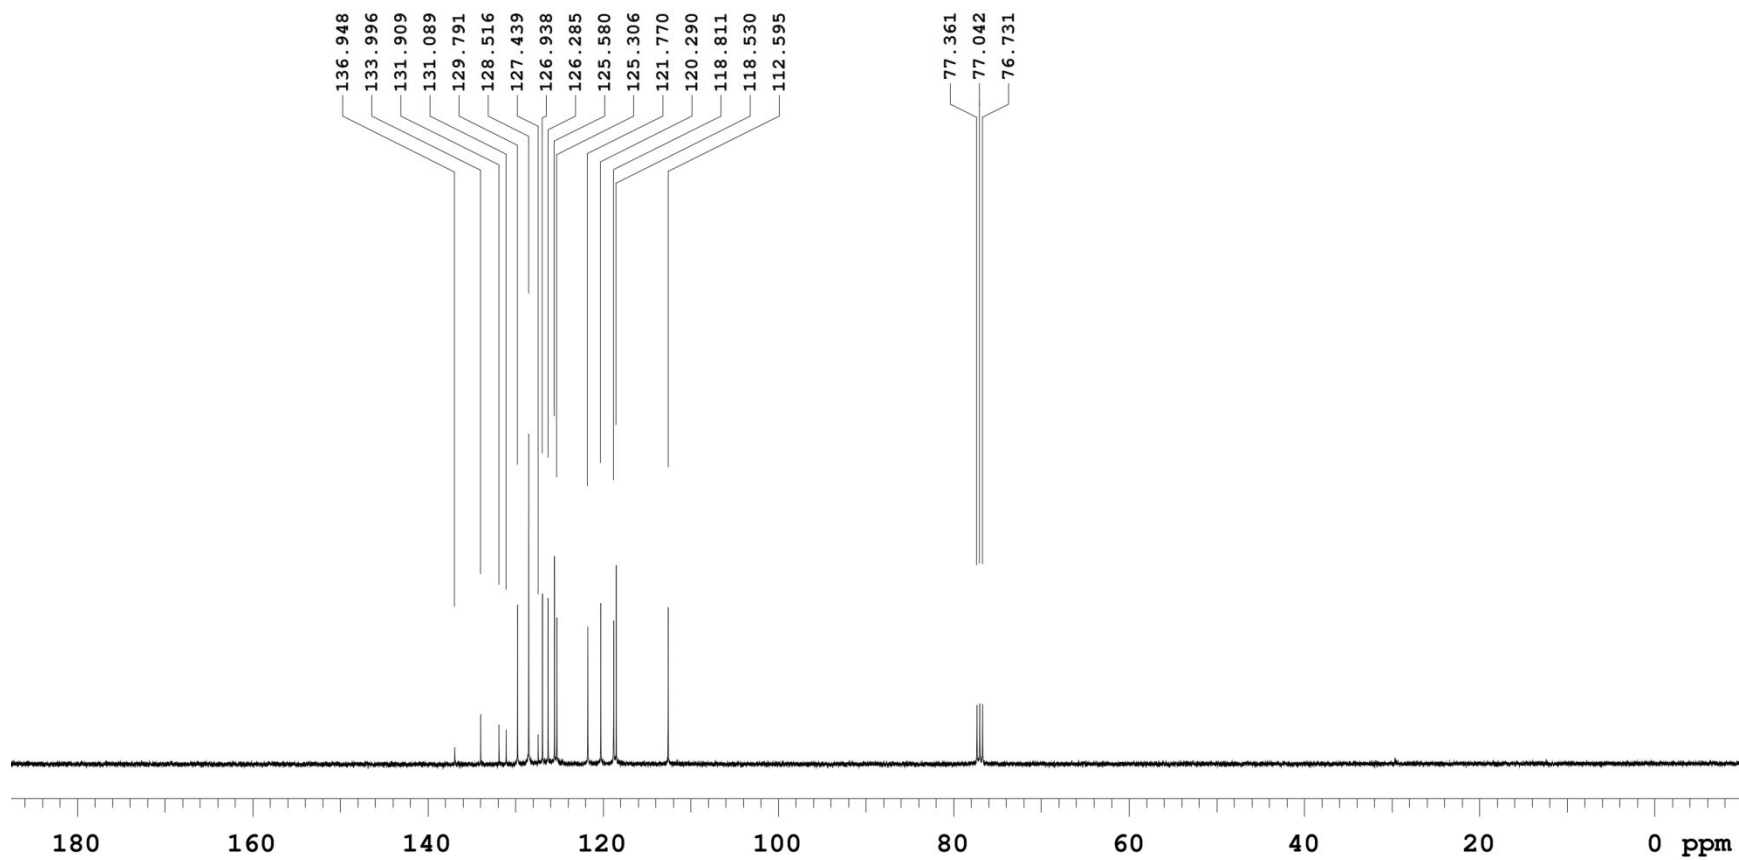

Supplement: c6ra03771b1.pdf [file c6ra03771b1.pdf]
